## **Identification of candidate biomarkers and pathways associated with type 1 diabetes mellitus using bioinformatics analysis**

Basavaraj Vastrad<sup>1</sup>, Chanabasayya Vastrad<sup>\*2</sup>

1. Department of Biochemistry, Basaveshwar College of Pharmacy, Gadag, Karnataka 582103, India.

2. Biostatistics and Bioinformatics, Chanabasava Nilaya, Bharthinagar, Dharwad 580001, Karnataka, India.

\* Chanabasayya Vastrad

channu.vastrad@gmail.com

Ph: +919480073398

Chanabasava Nilaya, Bharthinagar,

Dharwad 580001 , Karanataka, India

## Abstract

Type 1 diabetes mellitus (T1DM) is a metabolic disorder for which the underlying molecular mechanisms remain largely unclear. This investigation aimed to elucidate essential candidate genes and pathways in T1DM by integrated bioinformatics analysis. In this study, differentially expressed genes (DEGs) were analyzed using DESeq2 of R package from GSE162689 of the Gene Expression Omnibus (GEO). Gene ontology (GO) enrichment analysis, REACTOME pathway enrichment analysis, and construction and analysis of protein-protein interaction (PPI) network, modules, miRNA-hub gene regulatory network and TF-hub gene regulatory network, and validation of hub genes were then performed. A total of 952 DEGs (477 up regulated and 475 down regulated genes) were identified in T1DM. GO and REACTOME enrichment result results showed that DEGs mainly enriched in multicellular organism development, detection of stimulus, diseases of signal transduction by growth factor receptors and second messengers, and olfactory signaling pathway. The top hub genes such as MYC, EGFR, LNX1, YBX1, HSP90AA1, ESR1, FN1, TK1, ANLN and SMAD9 were screened out as the critical genes among the DEGs from the PPI network, modules, miRNA-hub gene regulatory network and TF-hub gene regulatory network. Receiver operating characteristic curve (ROC) analysis and RT-PCR confirmed that these genes were significantly associated with T1DM. In conclusion, the identified DEGs, particularly the hub genes, strengthen the understanding of the advancement and progression of T1DM, and certain genes might be used as candidate target molecules to diagnose, monitor and treat T1DM.

**Keywords:** differentially expressed genes; Type 1 diabetes mellitus; bioinformatics analysis; biomarkers; protein-protein interaction network

## Introduction

Type 1 diabetes mellitus (T1DM) is chronic autoimmune diabetes characterized by autoimmune mediated destruction of pancreatic beta cells [1]. T1DM is most generally identified in children and adolescents [2]. Epidemiological studies have shown that the incidence of T1DM has been increasing by 2% to 5% globally [3]. T1DM is a complex disease affected by numerous environmental factors, genetic factors and their interactions [4-5]. Several complication of T1DM such as cardiovascular disease [6], hypertension [7], diabetic retinopathy [8], diabetic nephropathy [9], diabetic neuropathy [10], obesity [11] and cognitive impairment [12]. Therefore, exploring the molecular mechanism of T1DM development and its associated biomarkers to improve the early diagnosis and treatment of T1DM.

Although the remarkable improvement is achieved in the treatment of T1DM is insulin therapy [13], the long-term survival rates of T1DM still remain low worldwide. One of the major reasons is that most patients with T1DM were diagnosed at advanced stages. It is crucial to find out new therapeutic targets and novel diagnostic biomarkers for the early diagnosis and timely treatment of T1DM. Therefore, it is still urgent to further explore the exact molecular mechanisms of the development of T1DM. At present, several genes and signaling pathway are identified; for example vitamin D receptor (VDR) [14], HLA-B and HLA-A [15], HLA-DQ [16], HLA-DQB1, HLA-DQA1 and HLA-DRB1 [17], IDDM2 [18], CaMKII/NF- $\kappa$ B/TGF- $\beta$ 1 and PPAR- $\gamma$  signaling pathway [19], Keap1/Nrf2 signaling pathway [20], HIF-1/VEGF pathway [21], NLRP3 and NLRP1 inflammasomes signaling pathway [22] and NO/cGMP signaling pathway [23]. Therefore, it is of great practical significance to explore the genes and signaling pathways of T1DM on  $\beta$  islet cells.

High-throughput RNA sequencing platform for gene expression analysis have been increasingly recognized as approaches with significant clinical value in areas such as molecular diagnosis, prognostic prediction and identification of novel therapeutic targets [24]. RNA sequencing analysis has been widely used in various gene expression profiling studies examining disease pathogenesis in the last decade, and has revealed many differentially expressed genes (DEGs) associated in various pathways, biological processes, and molecular functions. We

therefore used an expression profiling by high throughput sequencing dataset to investigate the pathogenesis of T1DM.

We downloaded expression profiling by high throughput sequencing dataset GSE162689 [25], from Gene Expression Omnibus database (GEO) (<http://www.ncbi.nlm.nih.gov/geo/>) [26], which contain gene expression data from T1DM samples and normal control samples. We then performed deep bioinformatics analysis, including identifying common differential expressed genes (DEGs), gene ontology (GO) enrichment analysis, REACTOME pathway enrichment analysis, and construction and analysis of protein-protein interaction (PPI) network, modules, miRNA-hub gene regulatory network and TF-hub gene regulatory network. The findings were further validated by receiver operating characteristic curve (ROC) analysis and RT-PCR. The aim of this study was to identify DEGs and important pathways, and to explore potential candidate biomarkers for the diagnosis, prognosis and therapeutic targets in T1DM.

## **Materials and methods**

### **Data resources**

Expression profiling by high throughput sequencing dataset GSE162689 [25] was obtained from GEO database. The dataset comprised total 59 samples, of which 27 were from T1DM samples and 32 were from normal control samples and was based on the GPL24014 Ion Torrent S5 XL (Homo sapiens).

### **Identification of DEGs**

Differentially expressed genes (DEGs) between T1DM and normal control samples were identified by using the DESeq2 package on R language software [27]. DEGs were considered when an adjusted  $P < 0.05$ , and a  $|\log_2 \text{fold change}| > 0.63$  for up regulated genes and  $|\log_2 \text{fold change}| < -1.3$  for down regulated genes. The adjusted  $P$  values, by employing Benjamini and Hochberg false discovery rate [28], were aimed to correct the occurrence of false positive results. The DEGs were presented in volcano plot and heat map drawn using a plotting tool ggplot2 and gplots based on the R language.

### **GO and REACTOME pathway enrichment analysis of DEGs**

One online tool, g:Profiler (<http://biit.cs.ut.ee/gprofiler/>) [29], was applied to carry out the functional annotation for DEGs. Gene Ontology (GO) (<http://geneontology.org/>) [30] generally perform enrichment analysis of genomes. And there are mainly biological processes (BP), cellular components (CC) and molecular functions (MF) in the GO enrichment analysis. REACTOME (<https://reactome.org/>) [31] is a comprehensive database of genomic, chemical, and systemic functional information. Therefore, g:Profiler was used to make enrichment analysis of GO and REACTOME.  $P < 0.05$  was set as the cutoff criterion.

### **Construction of the PPI network and module analysis**

PPI network was established using the IntAct Molecular Interaction Database (<https://www.ebi.ac.uk/intact/>) [32]. To assess possible PPI correlations, previously identified DEGs were mapped to the IntAct database, followed by extraction of PPI pairs with a combined score  $>0.4$ . Cytoscape 3.8.2 software ([www.cytoscape.org/](http://www.cytoscape.org/)) [33] was then employed to visualize the PPI network, and the Cytoscape plugin Network Analyzer was used to calculate the node degree [34], betweenness centrality [35], stress centrality [36] and closeness centrality [37] of each protein node. Specifically, nodes with a higher node degree, betweenness centrality, stress centrality and closeness centrality were likely to play a more vital role in maintaining the stability of the entire network. The PEWCC1 (<http://apps.cytoscape.org/apps/PEWCC1>) [38] plug-in was applied to analyze the modules in the PPI networks, with the default parameters (node score = 0.2, K-core  $\geq 2$ , and max depth = 100).

### **MiRNA-hub gene regulatory network construction**

The miRNAs targeting the T1DM related were predicted using the miRNet database (<https://www.mirnet.ca/>) [39], and those predicted by at least 14 databases (TarBase, miRTarBase, miRecords, miRanda, miR2Disease, HMDD, PhenomiR, SM2miR, PharmacomiR, EpimiR, starBase, TransmiR, ADmiRE, and TAM 2.0) were selected for constructing the miRNA-hub gene regulatory network by Cytoscape 3.8.2 software.

### **TF-hub gene regulatory network construction**

The TFs targeting the T1DM related were predicted using the NetworkAnalyst database (<https://www.networkanalyst.ca/>) [40], and those predicted by RegNetwork database was selected for constructing the TF-hub gene regulatory network by Cytoscape 3.8.2 software.

### **Validation of hub genes by receiver operating characteristic curve (ROC) analysis**

A ROC curve analysis is an approach for visualizing, organizing and selecting classifiers based on their achievement of hub genes. A diagnostic test was firstly performed in order to estimate the diagnostic value of hub genes in T1DM. ROC curves were obtained by plotting the sensitivity, against the specificity using the R package “pROC” [41]. Area under the curve (AUC) was used to measure the accuracy of these diagnostic values of the hub genes. An AUC  $> 0.9$  determined that the model had a favorable fitting effect.

### **Detection of the mRNA expression of the hub genes by RT-PCR**

Pancreatic beta MIN6 cells were maintained in Dulbecco’s minimal essential medium (DMEM) supplemented with 15 % fetal calf serum, 50 mg/l streptomycin and 75 mg/l penicillin sulphate. MIN6 cells treated with streptozotocin for T2DM and MIN6 cells untreated for normal control. All treated MIN6 cells and untreated MIN6 cells were incubated at 37 °C, 5% CO<sub>2</sub> in humidified incubator. Total RNA was extracted from the treated and untreated cells using TRI reagent (Sigma, USA) according to the manufacturer’s protocol. Reverse transcription kit (Thermo Fisher Scientific, Waltham, MA, USA) was used for Converting mRNA to cDNA. Expression levels of mRNAs were determined by RT-PCR using QuantStudio 7 Flex real-time PCR system (Thermo Fisher Scientific, Waltham, MA, USA). The protocol was set as follows: 50 °C for 2 min, 95 °C for 10 min, 40 cycles of 95 °C for 10 s, 60 °C for 30 s. All the samples were normalized to the corresponding expression of internal control  $\beta$ -actin . The test was performed in triplicate and the relative expression levels were calculated with the  $2^{-\Delta\Delta C_t}$  method [42]. Table 1 is given for primer sequences used in the RT-PCR.

## **Results**

### **Identification of DEGs**

On the basis of the cut-off criteria, DEGs in GEO dataset was identified between T1DN and normal control samples (Table 2). There were 952 DEGs, including 477 up regulated and 475 down regulated genes in GSE162689 with the threshold of adjusted  $P < 0.05$ , and a  $|\log_2 \text{fold change}| > 0.63$  for up regulated genes and  $|\log_2 \text{fold change}| < -1.3$  for down regulated genes. The volcano plot of the distribution of DEGs in is shown in Fig. 1. The expression heat map of the DEGs is shown in Fig. 2.

### **GO and REACTOME pathway enrichment analysis of DEGs**

To characterize the functional roles of the above DEGs, we used GO (Table 3) and REACTOME pathway (Table 4) enrichment analyses. The BP category of the GO analysis results showed that up regulated genes were significantly enriched in multicellular organism development and nitrogen compound metabolic process. For CC, these up regulated were enriched in membrane-enclosed lumen and nuclear lumen. Moreover, up regulated genes were significantly enriched in protein binding and transcription regulator activity in the MF categories. In addition, the most significantly enriched GO terms for down regulated genes were detection of stimulus and multicellular organismal process (BP), cell periphery and plasma membrane (CC), and transmembrane signaling receptor activity and molecular transducer activity (MF). According to REACTOME pathway enrichment analysis, up regulated genes were significantly enriched in diseases of signal transduction by growth factor receptors and second messengers and formation of the cornified envelope. Down regulated genes were enriched in olfactory signaling pathway and sensory perception.

### **Construction of the PPI network and module analysis**

The PPI network of the DEGs was constructed with 5111 nodes and 9392 edges by using the IntAct database (Fig. 3). A node with a higher node degree, betweenness centrality, stress centrality and closeness centrality consider as a hub genes and are listed in Table 5. The key points of the network include the up regulated hub genes, such as MYC, EGFR, LNX1, YBX1 and HSP90AA1, and the down regulated hub genes, such as ESR1, FN1, TK1, ANLN and SMAD9. To detect significant modules in the PPI network, the PEWCC1 plugin was used for analysis, and two modules that had the highest degree stood out. GO and pathway enrichment



analysis showed that module 1 contained 28 nodes and 63 edges (Fig.4A), which were associated with diseases of signal transduction by growth factor receptors and second messengers, disease, nitrogen compound metabolic process and membrane-enclosed lumen, while module 2 had 14 nodes and 30 edges (Fig.4B), which were mainly associated with signal transduction, multicellular organismal process and detection of stimulus.

### **MiRNA-hub gene regulatory network construction**

The network of miRNAs and predicted targets (hub genes) is presented in Table 6. Based on the miRNAs, a miRNA -hub gene regulatory network was constructed with 2568 nodes (miRNA: 2259; hub gene: 309) and 16618 interaction pairs (Fig.5). Notably, MYC targeted 194 miRNAs, including hsa-mir-4677-3p; HSP90AA1 targeted 188 miRNAs, including hsa-mir-3125; FKBP5 targeted 116 miRNAs, including hsa-mir-4779; RNPS1 targeted 109 miRNAs, including hsa-mir-548az-3p; SQSTM1 targeted 108 miRNAs, including hsa-mir-106a-5p; ANLN targeted 127 miRNAs, including hsa-mir-664a-3p; CDK1 targeted 109 miRNAs, including hsa-mir-5688; FN1 targeted 105 miRNAs, including hsa-mir-199b-3p; ESR1 targeted 98 miRNAs, including hsa-mir-206; TK1 targeted 80 miRNAs, including hsa-mir-6512-3p.

### **TF-hub gene regulatory network construction**

The network of TFs and predicted targets (hub genes) is presented in Table 6. Based on the TFs, a TF -hub gene regulatory network was constructed with 899 nodes (TF: 604; hub gene: 295) and 3542 interaction pairs (Fig.6). Notably, MAPK3 targeted 48 TFs, including JUND; HSP90AA1 targeted 35 TFs, including HSF2; SQSTM1 targeted 34 TFs, including SMAD4; STUB1 targeted 31 TFs, including ATF6; EGFR targeted 27 TFs, including ELF3; ESR1 targeted 126 TFs, including ELF3; SMAD9 targeted 38 TFs, including ELF3; CDK1 targeted 36 TFs, including ELF3; FN1 targeted 25 TFs, including ELF3; NEK6 targeted 16 TFs, including ELF3.

### **Validation of hub genes by receiver operating characteristic curve (ROC) analysis**



ROC curve analysis was for evaluating the capacity of MYC, EGFR, LNX1, YBX1, HSP90AA1, ESR1, FN1, TK1, ANLN and SMAD9, so as to distinguish T1DM from normal control (Fig.7). ROC curve analysis showed that MYC, EGFR, LNX1, YBX1, HSP90AA1, ESR1, FN1, TK1, ANLN and SMAD9 expression levels have potential diagnostic value for T1DM patients ( $AUC > 0.9$ ).

### **Detection of the mRNA expression of the hub genes by RT-PCR**

Next, in order to verify the results of previous bioinformatics analysis, the gene expression levels of MYC, EGFR, LNX1, YBX1, HSP90AA1, ESR1, FN1, TK1, ANLN and SMAD9 were detected by RT-PCR between T1DM and normal control. As shown in Fig 8, compared with normal tissues, MYC, EGFR, LNX1, YBX1 and HSP90AA1 mRNA expression levels were significantly up regulated in the T1DM, and ESR1, FN1, TK1, ANLN and SMAD9 mRNA level were down regulated, which was consistent with the results of bioinformatics analysis.

### **Discussion**

T1DM is the common forms of chronic autoimmune diabetes that affect an individual's quality of life [43]. However, the potential causes of T1DM remain uncertain. Understanding the underlying molecular pathogenesis of T1DM is of key importance for diagnosis, prognosis, and identifying drug targets. As high-throughput RNA sequencing can provide information regarding the expression levels of thousands of genes in the human genome simultaneously, this methodology has been widely used to predict the potential diagnostic and therapeutic targets for T1DM. In the present investigation, we extracted the data from GSE162689, which includes 27 T1DM samples and 32 normal control samples. We identified 477 up regulated and 475 down regulated genes between T1DM samples and normal control samples using bioinformatics analysis. FGA (fibrinogen alpha chain) [44] and FGB (fibrinogen beta chain) [45] genes have been found to be expressed in cardiovascular disease, but these genes might be novel target for T1DM. IGF2 [46], IAPP (islet amyloid polypeptide) [47], INS (insulin) [48] and MAFA (MAF bZIP transcription factor A) [49] have been reported be associated with the development of T1DM. Previous study have indicated the expression of ADCYAP1 is associated in type 2 diabetes mellitus [50], but this gene might be novel target for T1DM. Gold et al. [51] found the

CSNK1G1 was a prognostic factor in cognitive impairment, but this gene might be novel target for T1DM.

Furthermore, we investigated the biological functions of these DEGs by using online website, and GO and pathway enrichment analysis. Husemoen et al [52], Zhang et al [53], Hartz et al [54], Słomiński et al [55], Johansson et al [56], Pan et al [57], Lopez-Sanz et al [58], Grant, [59], Słomiński et al [60], Galán et al [61], Jordan et al [62], Winkler et al [63], Yip et al [64], Crookshank et al [65], Lempainen et al [66], Qu and Polychronakos, [67], Morrison et al [68], Zhang et al [69], Gerlinger-Romero et al [70], Belanger et al [71], Dieter et al [72], Wanic et al [73], Ushijima Wanic et al [74], Guo et al [75], Davis et al [76], Elbarbary et al [77], Villasenor et al [78], Zhang et al [79], Lee et al [80], Zhi et al [81], Li Calzi et al [82], Sebastiani et al [83], Cherney et al [84], Doggrell, [85] and Yanagihara et al [86] found that FLG (filaggrin), FGF21, PEMT (phosphatidylethanolamine N-methyltransferase) KL (klotho), CEL (carboxyl ester lipase), FOSL2, STAT1, TCF7L2, TP53, EGFR (epidermal growth factor receptor), ETS1, KCNJ8, DEAF1, GCG (glucagon), IKZF4, OAS1, IRS1, ABCG2, FBXO32, PTBP1, BACH2, CNDP2, KLF11, MT1E, DPP4, SLC29A3, RGS16, MAS1, GCGR (glucagon receptor), HLA-C, VASP (vasodilator stimulated phosphoprotein), CCR2, PTGS2, GLP1R and JMJD6 are involved in the progression of T1DM. Vassilev et al [87], Qin et al [88], Ma et al [89], West et al [90], Hoffmann et al [91], Deary et al [92], Belangero et al [93], Jung et al [94], Tang et al [95], Goodier et al [96], Petyuk et al [97], Roux et al [98], Castrogiovanni et al [99], Suleiman et al [100], Haack et al [101], Kwiatkowski et al [102], Pinacho et al [103], Luo et al [104], He et al [105], Moudi et al [106], Thevenon et al [107], Li et al [108], Reitz et al [109], Jenkins and Escayg [110], Letronne et al [111], Ma et al [112], Chabbert et al [113], Abramsson et al [114], Aeby et al [115] and Roll et al [116] found that the expression of DCC (DCC netrin 1 receptor), PLP1, SNX19, SH3RF1, TNFRSF1A, NCSTN (nicastrin), DGCR2, NPAS2, CDNF (cerebral dopamine neurotrophic factor), SMCR8, HSPA2, STUB1, CHID1, ATP13A2, SQSTM1, LIG3, SP4, ACSL6, ERN1, ATF6B, LRFN2, NRG3, LRRTM3, GABRA2, ADAM30, GABRR2, TSHZ3, LOXL1, SCN1B and SRPX2 are associated with the prognosis of patients with cognitive impairment, but these genes might be novel target for T1DM. Recent studies found that KCP (kielin cysteine rich BMP regulator) [117], NOG (noggin) [118], COL6A3 [119], BTG2 [120], RPS6 [121], KLF15 [122],

KLF3 [123], ZFP36 [124], ETV5 [125], TLE3 [126], NNMT (nicotinamide N-methyltransferase) [127], WDTC1 [128], ZFH3 [129], SIAH2 [130], MBOAT7 [131], RUNX1T1 [132], MAPK4 [133], KLF9 [134], SELENBP1 [135], HELZ2 [136], ELK1 [137], SERTAD2 [138], CRT3 [139], ABCB11 [140], TACR1 [141], SLC22A11 [142], PER3 [143], P2RX5 [144], MFAP5 [145], FGL1 [146], OLFM4 [147], NTN1 [148], ESR1 [149], ABCB1 [150], VAV3 [151] and LAMB3 [152] plays an important role in the occurrence and development of obesity, but these genes might be novel target for T1DM. STAR (steroidogenic acute regulatory protein) [153], IL1RN [154], AQP5 [155], EGR1 [156], SFTPD (surfactant protein D) [157], KLF10 [158], PODXL (podocalyxin like) [159], FOXN3 [160], IL6R [161], PBX1 [162], APOD (apolipoprotein D) [163], ACVR2B [164], CD34 [165], INSR (insulin receptor) [166], APOA5 [167], STAR (steroidogenic acute regulatory protein) [168], PDK4 [169], GLS (glutaminase) [170], FKBP5 [171], SLC6A15 [172], MT2A [173], SLC38A4 [174], AQP7 [175], ABHD15 [176], ABCA1 [177], ZNRF1 [178], PPP1R3B [179], MAOA (monoamine oxidase A) [180], UBE2E2 [181], RNASEK (ribonuclease K) [182], PREX1 [183], DGKG (diacylglycerol kinase gamma) [184], POSTN (periostin) [185], COMP (cartilage oligomeric matrix protein) [186], GAP43 [187], P2RY12 [188], SELL (selectin L) [189] and DLG2 [190] have been revealed to be associated with type 2 diabetes mellitus, but these genes might be novel target for T1DM. Expression of ERFFI1 [191], ALOX12 [192], SOCS5 [193], DDIT4 [194], DUSP4 [195], IL6ST [196], DUSP1 [197], SMAD1 [198], NCL (nucleolin) [199], METTL14 [200], FMOD (fibromodulin) [201], CYGB (cytoglobin) [202], UNC5A [203] and TAAR9 [204] are associated with prognosis in patients with diabetic nephropathy, but these genes might be novel target for T1DM. A previous study reported that FAP (fibroblast activation protein alpha) [205], EYA4 [206], BCL9 [207], IRF2BP2 [208], EGR3 [209], GADD45B [210], DMD (dystrophin) [211], LSR (lipolysis stimulated lipoprotein receptor) [212], DLL4 [213], SUN2 [214], SOS1 [215], PIK3CA [216], GAMT (guanidinoacetate N-methyltransferase) [217], RBM47 [218], HSP90AA1 [219], GAB1 [220], S1PR1 [221], EDNRB (endothelin receptor type B) [222], NFKBIA (NFKB inhibitor alpha) [223], GJA1 [224], GADD45G [225], PHLDA1 [226], CMPK2 [227], FIGN (fidgetin, microtubule severing factor) [228], KCNJ2 [229], ABCC9 [230], DIRAS3 [231], EPHX1 [232], RAB4A [233], UBIAD1 [234], CASQ2 [235], TTN (titin) [236], KCNH1 [237], JPH2 [238], OXGR1 [239], UCHL1 [240], SERPINA3 [241],

MMP28 [242], ADAMTS2 [243], P2RY1 [244], CSF2RA [245], MYO1F [246], SELPLG (selectin P ligand) [247] and SAMHD1 [248] are expressed in cardiovascular disease, but these genes might be novel target for T1DM. MAOB (monoamine oxidase B) [249], VEGFC (vascular endothelial growth factor C) [250], DBP (D-box binding PAR bZIP transcription factor) [251], MYADM (myeloid associated differentiation marker) [252], NES (nestin) [253], SMURF1 [254], EDNRB (endothelin receptor type B) [255], MUC6 [256], TOR2A [257], TNKS (tankyrase) [258], NEDD9 [259], ASIC1 [260], ADAMTS8 [261], DYSF (dysferlin) [262], SLC26A9 [263], SLC45A3 [264] and KCNQ2 [265] contributes to the progression of hypertension, but these genes might be novel target for T1DM. Yang et al [266], Zhang et al [267] and Wang et al [268] demonstrated that SYVN1, BTG1 and CFB (complement factor B) were associated with diabetic retinopathy, but these genes might be novel target for T1DM.

PPI network and modules were used to identify hub genes. The results of the present investigation might provide potential biomarkers for the diagnosis of T1DM. SMAD9 has been shown to be activated in hypertension [269], but this genes might be novel target for T1DM. MYC, LNX1, YBX1, FN1, TK1 and ANLN (anillin actin binding protein) might be the novel biomarkers for T1DM.

In this investigation, the miRNA-hub gene regulatory network and TF-hub gene regulatory network that regulates T1DM was constructed. Recent studies found that CDK1 [270], hsa-mir-199b-3p [271], JUND [272] and FOXF2 [273] plays an important role in the occurrence and development of obesity, but these genes might be novel target for T1DM. The hsa-mir-106a-5p [274], hsa-mir-206 [275], SMAD4 [276] and ATF6 [277] are a major regulator of type 2 diabetes mellitus, but these genes might be novel target for T1DM. Studies have shown that the hsa-mir-106a-5p [278] and HSF2 [279] are essential for regulating cardiovascular disease, but these genes might be novel target for T1DM. Mendes-Silva et al [280] indicated that hsa-mir-664a-3p facilitated cognitive impairment, but this gene might be novel target for T1DM. ELF3 participated in diabetic nephropathy [281], but this gene might be novel target for T1DM. SRY is crucial for hypertension progression [282], but this gene might be novel target for T1DM. RNPS1, MAPK3, NEK6, hsa-mir-4677-3p, hsa-mir-3125, hsa-mir-4779, hsa-mir-548az-3p, hsa-mir-5688, hsa-mir-6512-3p, XAB2, KHDRBS1 and RELA might be the novel biomarkers for T1DM.

In conclusion, the present investigation shows the global profile of DEGs and relative signaling pathways that might play in the initiation and progression of T1DM. In the pathogenesis of acne, the possible crucial genes are MYC, EGFR, LNX1, YBX1, HSP90AA1, ESR1, FN1, TK1, ANLN and SMAD9, and the possible important GO terms and pathways are multicellular organism development, detection of stimulus, diseases of signal transduction by growth factor receptors and second messengers, and olfactory signaling pathway. Therefore, it provides new research directions for the detection and treatment of T1DM. However, their involvement in the molecular mechanisms of disease needs further clinical studies.

### **Acknowledgement**

I thank Anders Roger Hedin, Uppsala University, Clinical immunology, Olle Korsgren, Uppsala, Uppland, Sweden, very much, the author who deposited their profiling by high throughput sequencing dataset GSE162689, into the public GEO database.

### **Conflict of interest**

The authors declare that they have no conflict of interest.

### **Ethical approval**

This article does not contain any studies with human participants or animals performed by any of the authors.

### **Informed consent**

No informed consent because this study does not contain human or animals participants.

### **Availability of data and materials**

The datasets supporting the conclusions of this article are available in the GEO (Gene Expression Omnibus) (<https://www.ncbi.nlm.nih.gov/geo/>) repository. [(GSE162689) (<https://www.ncbi.nlm.nih.gov/geo/query/acc.cgi?acc=GSE162689>)]

### **Consent for publication**

Not applicable.

### **Competing interests**

The authors declare that they have no competing interests.

### **Author Contributions**

B. V - Writing original draft, and review and editing

C. V - Software and investigation

### **Authors**

Basavaraj Vastrad

ORCID ID: [0000-0003-2202-7637](https://orcid.org/0000-0003-2202-7637)

Chanabasayya Vastrad

ORCID ID: [0000-0003-3615-4450](https://orcid.org/0000-0003-3615-4450)

### **References**

1. Bekris LM, Kavanagh TJ, Lernmark A. Targeting type 1 diabetes before and at the clinical onset of disease. *Endocr Metab Immune Disord Drug Targets*. 2006;6(1):103-124. doi:[10.2174/187153006776056576](https://doi.org/10.2174/187153006776056576)
2. Haller MJ, Atkinson MA, Schatz D. Type 1 diabetes mellitus: etiology, presentation, and management. *Pediatr Clin North Am*. 2005;52(6):1553-1578. doi:[10.1016/j.pcl.2005.07.006](https://doi.org/10.1016/j.pcl.2005.07.006)
3. Maahs DM, West NA, Lawrence JM, Mayer-Davis EJ. Epidemiology of type 1 diabetes. *Endocrinol Metab Clin North Am*. 2010;39(3):481-497. doi:[10.1016/j.ecl.2010.05.011](https://doi.org/10.1016/j.ecl.2010.05.011)
4. Akerblom HK, Vaarala O, Hyöty H, Ilonen J, Knip M. Environmental factors in the etiology of type 1 diabetes. *Am J Med Genet*. 2002;115(1):18-29. doi:[10.1002/ajmg.10340](https://doi.org/10.1002/ajmg.10340)
5. Pociot F, Lernmark Å. Genetic risk factors for type 1 diabetes. *Lancet*. 2016;387(10035):2331-2339. doi:[10.1016/S0140-6736\(16\)30582-7](https://doi.org/10.1016/S0140-6736(16)30582-7)
6. Nathan DM, Cleary PA, Backlund JY, Genuth SM, Lachin JM, Orchard TJ, Raskin P, Zinman B. Intensive diabetes treatment and cardiovascular disease in patients with type 1 diabetes. *N Engl J Med*. 2005;353(25):2643-2653. doi:[10.1056/NEJMoa052187](https://doi.org/10.1056/NEJMoa052187)



7. de Boer IH, Kestenbaum B, Rue TC, Steffes MW, Cleary PA, Molitch ME, Lachin JM, Weiss NS, Brunzell JD. Insulin therapy, hyperglycemia, and hypertension in type 1 diabetes mellitus. *Arch Intern Med.* 2008;168(17):1867-1873. doi:[10.1001/archinternmed.2008.2](https://doi.org/10.1001/archinternmed.2008.2)
8. Hammes HP, Kerner W, Hofer S, Kordonouri O, Raile K, Holl RW. Diabetic retinopathy in type 1 diabetes-a contemporary analysis of 8,784 patients. *Diabetologia.* 2011;54(8):1977-1984. doi:[10.1007/s00125-011-2198-1](https://doi.org/10.1007/s00125-011-2198-1)
9. Pätäri A, Forsblom C, Havana M, Taipale H, Groop PH, Holthöfer H. Nephropathy in diabetic nephropathy of type 1 diabetes. *Diabetes.* 2003;52(12):2969-2974. doi:[10.2337/diabetes.52.12.2969](https://doi.org/10.2337/diabetes.52.12.2969)
10. González-Clemente JM, Mauricio D, Richart C, Broch M, Caixàs A, Megia A, Giménez-Palop O, Simón I, Martínez-Riquelme A, Giménez-Pérez G, et al. Diabetic neuropathy is associated with activation of the TNF-alpha system in subjects with type 1 diabetes mellitus. *Clin Endocrinol (Oxf).* 2005;63(5):525-529. doi:[10.1111/j.1365-2265.2005.02376.x](https://doi.org/10.1111/j.1365-2265.2005.02376.x)
11. Sandhu N, Witmans MB, Lemay JF, Crawford S, Jadavji N, Pacaud D. Prevalence of overweight and obesity in children and adolescents with type 1 diabetes mellitus. *J Pediatr Endocrinol Metab.* 2008;21(7):631-640. doi:[10.1515/JPEM.2008.21.7.631](https://doi.org/10.1515/JPEM.2008.21.7.631)
12. Brismar T, Maurex L, Cooray G, Juntti-Berggren L, Lindström P, Ekberg K, Adner N, Andersson S. Predictors of cognitive impairment in type 1 diabetes. *Psychoneuroendocrinology.* 2007;32(8-10):1041-1051. doi:[10.1016/j.psyneuen.2007.08.002](https://doi.org/10.1016/j.psyneuen.2007.08.002)
13. Charbonnel B, Penfornis A, Varroud-Vial M, Kusnik-Joinville O, Detournay B. Insulin therapy for diabetes mellitus: treatment regimens and associated costs. *Diabetes Metab.* 2012;38(2):156-163. doi:[10.1016/j.diabet.2011.10.003](https://doi.org/10.1016/j.diabet.2011.10.003)
14. Chang TJ, Lei HH, Yeh JI, Chiu KC, Lee KC, Chen MC, Tai TY, Chuang LM. Vitamin D receptor gene polymorphisms influence susceptibility to type 1 diabetes mellitus in the Taiwanese population. *Clin Endocrinol (Oxf).* 2000;52(5):575-580. doi:[10.1046/j.1365-2265.2000.00985.x](https://doi.org/10.1046/j.1365-2265.2000.00985.x)
15. Nejentsev S, Howson JM, Walker NM, Szeszko J, Field SF, Stevens HE, Reynolds P, Hardy M, King E, Masters J, et al. Localization of type 1



- diabetes susceptibility to the MHC class I genes HLA-B and HLA-A. *Nature*. 2007;450(7171):887-892. doi:[10.1038/nature06406](https://doi.org/10.1038/nature06406)
16. Thorsby E, Rønningen KS. Particular HLA-DQ molecules play a dominant role in determining susceptibility or resistance to type 1 (insulin-dependent) diabetes mellitus. *Diabetologia*. 1993;36(5):371-377. doi:[10.1007/BF00402270](https://doi.org/10.1007/BF00402270)
  17. Nejentsev S, Sjöroos M, Soukka T, Knip M, Simell O, Lövgren T, Ilonen J. Population-based genetic screening for the estimation of Type 1 diabetes mellitus risk in Finland: selective genotyping of markers in the HLA-DQB1, HLA-DQA1 and HLA-DRB1 loci. *Diabet Med*. 1999;16(12):985-992. doi:[10.1046/j.1464-5491.1999.00186.x](https://doi.org/10.1046/j.1464-5491.1999.00186.x)
  18. Barratt BJ, Payne F, Lowe CE, Hermann R, Healy BC, Harold D, Concannon P, Gharani N, McCarthy MI, Olavesen MG, et al. Remapping the insulin gene/IDDM2 locus in type 1 diabetes. *Diabetes*. 2004;53(7):1884-1889. doi:[10.2337/diabetes.53.7.1884](https://doi.org/10.2337/diabetes.53.7.1884)
  19. Gbr AA, Abdel Baky NA, Mohamed EA, Zaky HS. Cardioprotective effect of pioglitazone and curcumin against diabetic cardiomyopathy in type 1 diabetes mellitus: impact on CaMKII/NF- $\kappa$ B/TGF- $\beta$ 1 and PPAR- $\gamma$  signaling pathway. *Naunyn Schmiedebergs Arch Pharmacol*. 2021;394(2):349-360. doi:[10.1007/s00210-020-01979-y](https://doi.org/10.1007/s00210-020-01979-y)
  20. Lou Y, Kong M, Li L, et al. Inhibition of the Keap1/Nrf2 Signaling Pathway Significantly Promotes the Progression of Type 1 Diabetes Mellitus. *Oxid Med Cell Longev*. 2021;2021:7866720. doi:[10.1155/2021/7866720](https://doi.org/10.1155/2021/7866720)
  21. Güzel D, Dursun AD, Fıçıcılar H, Tekin D, Tanyeli A, Akat F, Topal Çelikkan F, Sabuncuoğlu B, Baştuğ M. Effect of intermittent hypoxia on the cardiac HIF-1/VEGF pathway in experimental type 1 diabetes mellitus. *Anatol J Cardiol*. 2016;16(2):76-83. doi:[10.5152/akd.2015.5925](https://doi.org/10.5152/akd.2015.5925)
  22. Liu H, Xu R, Kong Q, Liu J, Yu Z, Zhao C. Downregulated NLRP3 and NLRP1 inflammasomes signaling pathways in the development and progression of type 1 diabetes mellitus. *Biomed Pharmacother*. 2017;94:619-626. doi:[10.1016/j.biopha.2017.07.102](https://doi.org/10.1016/j.biopha.2017.07.102)
  23. Farkas K, Jermendy G, Herold M, Ruzicska E, Sasvári M, Somogyi A. Impairment of the NO/cGMP pathway in the fasting and postprandial state in type 1 diabetes mellitus. *Exp Clin Endocrinol Diabetes*. 2004;112(5):258-263. doi:[10.1055/s-2004-817973](https://doi.org/10.1055/s-2004-817973)

24. Potter SS. Single-cell RNA sequencing for the study of development, physiology and disease. *Nat Rev Nephrol.* 2018;14(8):479-492. doi:[10.1038/s41581-018-0021-7](https://doi.org/10.1038/s41581-018-0021-7)
25. Seiron P, Stenwall A, Hedin A, Granlund L, Esguerra JLS, Volkov P, Renström E, Korsgren O, Lundberg M, Skog O. Transcriptional analysis of islets of Langerhans from organ donors of different ages. *PLoS One.* 2021;16(3):e0247888. doi:[10.1371/journal.pone.0247888](https://doi.org/10.1371/journal.pone.0247888)
26. Clough E, Barrett T. The Gene Expression Omnibus Database. *Methods Mol Biol.* 2016;1418:93-110. doi:[10.1007/978-1-4939-3578-9\\_5](https://doi.org/10.1007/978-1-4939-3578-9_5)
27. Varet H, Brillet-Guéguen L, Coppée JY, Dillies MA. SARTools: A DESeq2- and EdgeR-Based R Pipeline for Comprehensive Differential Analysis of RNA-Seq Data. *PLoS One.* 2016;11(6):e0157022. doi:[10.1371/journal.pone.0157022](https://doi.org/10.1371/journal.pone.0157022)
28. Hardcastle TJ. Generalized empirical Bayesian methods for discovery of differential data in high-throughput biology. *Bioinformatics.* 2016;32(2):195-202. doi:[10.1093/bioinformatics/btv569](https://doi.org/10.1093/bioinformatics/btv569)
29. Reimand J, Kull M, Peterson H, Hansen J, Vilo J. g:Profiler--a web-based toolset for functional profiling of gene lists from large-scale experiments. *Nucleic Acids Res.* 2007;35(Web Server issue):W193-W200. doi:[10.1093/nar/gkm226](https://doi.org/10.1093/nar/gkm226)
30. Thomas PD. The Gene Ontology and the Meaning of Biological Function. *Methods Mol Biol.* 2017;1446:15–24. doi:[10.1007/978-1-4939-3743-1\\_2](https://doi.org/10.1007/978-1-4939-3743-1_2)
31. Fabregat A, Jupe S, Matthews L, Sidiropoulos K, Gillespie M, Garapati P, Haw R, Jassal B, Korninger F, May B et al The Reactome Pathway Knowledgebase. *Nucleic Acids Res.* 2018;46(D1):D649–D655. doi:[10.1093/nar/gkx1132](https://doi.org/10.1093/nar/gkx1132)
32. Orchard S, Ammari M, Aranda B, Breuza L, Briganti L, Broackes-Carter F, Campbell NH, Chavali G, Chen C, del-Toro N, et al. The MIntAct project--IntAct as a common curation platform for 11 molecular interaction databases. *Nucleic Acids Res.* 2014;42(Database issue):D358-D363. doi:[10.1093/nar/gkt1115](https://doi.org/10.1093/nar/gkt1115)
33. Shannon P, Markiel A, Ozier O, Baliga NS, Wang JT, Ramage D, Amin N, Schwikowski B, Ideker T Cytoscape: a software environment for integrated models of biomolecular interaction networks. *Genome Res* 2003;13(11):2498-2504. doi:[10.1101/gr.1239303](https://doi.org/10.1101/gr.1239303)

34. Przulj N, Wigle DA, Jurisica I. Functional topology in a network of protein interactions. *Bioinformatics*. 2004;20(3):340–348. doi:[10.1093/bioinformatics/btg415](https://doi.org/10.1093/bioinformatics/btg415)
35. Nguyen TP, Liu WC, Jordán F. Inferring pleiotropy by network analysis: linked diseases in the human PPI network. *BMC Syst Biol*. 2011;5:179. doi:[10.1186/1752-0509-5-179](https://doi.org/10.1186/1752-0509-5-179)
36. Shi Z, Zhang B. Fast network centrality analysis using GPUs. *BMC Bioinformatics*. 2011;12:149. doi:[10.1186/1471-2105-12-149](https://doi.org/10.1186/1471-2105-12-149)
37. Fadhal E, Gamiieldien J, Mwambene EC. Protein interaction networks as metric spaces: a novel perspective on distribution of hubs. *BMC Syst Biol*. 2014;8:6. doi:[10.1186/1752-0509-8-6](https://doi.org/10.1186/1752-0509-8-6)
38. Zaki N, Efimov D, Berenguères J. Protein complex detection using interaction reliability assessment and weighted clustering coefficient. *BMC Bioinformatics*. 2013;14:163. doi:[10.1186/1471-2105-14](https://doi.org/10.1186/1471-2105-14)
39. Fan Y, Xia J (2018) miRNet-Functional Analysis and Visual Exploration of miRNA-Target Interactions in a Network Context. *Methods Mol Biol* 1819:215-233. doi:[10.1007/978-1-4939-8618-7\\_10](https://doi.org/10.1007/978-1-4939-8618-7_10)
40. Zhou G, Soufan O, Ewald J, Hancock REW, Basu N, Xia J (2019) NetworkAnalyst 3.0: a visual analytics platform for comprehensive gene expression profiling and meta-analysis. *Nucleic Acids Res* 47:W234-W241. doi:[10.1093/nar/gkz240](https://doi.org/10.1093/nar/gkz240)
41. Robin X, Turck N, Hainard A, Tiberti N, Lisacek F, Sanchez JC, Müller M. pROC: an open-source package for R and S+ to analyze and compare ROC curves. *BMC Bioinformatics* 2011;12:77. doi:[10.1186/1471-2105-12-77](https://doi.org/10.1186/1471-2105-12-77)
42. Livak KJ, Schmittgen TD. Analysis of relative gene expression data using real-time quantitative PCR and the 2<sup>-</sup>(Delta Delta C(T)) Method. *Methods* 2001;25:402–408. doi:[10.1006/meth.2001.1262](https://doi.org/10.1006/meth.2001.1262)
43. Gillespie KM. Type 1 diabetes: pathogenesis and prevention. *CMAJ*. 2006;175(2):165-170. doi:[10.1503/cmaj.060244](https://doi.org/10.1503/cmaj.060244)
44. Jacquemin B, Antoniadou C, Nyberg F, Plana E, Müller M, Greven S, Salomaa V, Sunyer J, Bellander T, Chalamandaris AG, et al. Common genetic polymorphisms and haplotypes of fibrinogen alpha, beta, and gamma chains affect fibrinogen levels and the response to proinflammatory stimulation in myocardial infarction survivors: the AIRGENE study. *J Am Coll Cardiol*. 2008;52(11):941-952. doi:[10.1016/j.jacc.2008.06.016](https://doi.org/10.1016/j.jacc.2008.06.016)

45. Theodoraki EV, Nikopentis T, Suhorutsenko J, Peppas V, Fili P, Kolovou G, Papamikos V, Richter D, Zakopoulos N, Krjutskov K, et al. Fibrinogen beta variants confer protection against coronary artery disease in a Greek case-control study. *BMC Med Genet.* 2010;11:28. doi:[10.1186/1471-2350-11-28](https://doi.org/10.1186/1471-2350-11-28)
46. Vafiadis P, Bennett ST, Todd JA, Grabs R, Polychronakos C. Divergence between genetic determinants of IGF2 transcription levels in leukocytes and of IDDM2-encoded susceptibility to type 1 diabetes. *J Clin Endocrinol Metab.* 1998;83(8):2933-2939. doi:[10.1210/jcem.83.8.5048](https://doi.org/10.1210/jcem.83.8.5048)
47. Paulsson JF, Ludvigsson J, Carlsson A, Casas R, Forsander G, Ivarsson SA, Kockum I, Lernmark Å, Marcus C, Lindblad B, et al. High plasma levels of islet amyloid polypeptide in young with new-onset of type 1 diabetes mellitus. *PLoS One.* 2014;9(3):e93053. doi:[10.1371/journal.pone.0093053](https://doi.org/10.1371/journal.pone.0093053)
48. Pugliese A, Zeller M, Fernandez A Jr, Zalcborg LJ, Bartlett RJ, Ricordi C, Pietropaolo M, Eisenbarth GS, Bennett ST, Patel DD. The insulin gene is transcribed in the human thymus and transcription levels correlated with allelic variation at the INS VNTR-IDDM2 susceptibility locus for type 1 diabetes. *Nat Genet.* 1997;15(3):293-297. doi:[10.1038/ng0397-293](https://doi.org/10.1038/ng0397-293)
49. Iacovazzo D, Flanagan SE, Walker E, Quezado R, de Sousa Barros FA, Caswell R, Johnson MB, Wakeling M, Brändle M, Guo M, et al. MAFA missense mutation causes familial insulinomatosis and diabetes mellitus. *Proc Natl Acad Sci U S A.* 2018;115(5):1027-1032. doi:[10.1073/pnas.1712262115](https://doi.org/10.1073/pnas.1712262115)
50. Gu HF. Genetic variation screening and association studies of the adenylyl cyclase activating polypeptide 1 (ADCYAP1) gene in patients with type 2 diabetes. *Hum Mutat.* 2002;19(5):572-573. doi:[10.1002/humu.9034](https://doi.org/10.1002/humu.9034)
51. Gold NB, Li D, Chassevent A, Kaiser FJ, Parenti I, Strom TM, Ramos FJ, Puisac B, Pié J, McWalter K, et al. Heterozygous de novo variants in CSNK1G1 are associated with syndromic developmental delay and autism spectrum disorder. *Clin Genet.* 2020;98(6):571-576. doi:[10.1111/cge.13851](https://doi.org/10.1111/cge.13851)
52. Husemoen LL, Skaaby T, Jørgensen T, Thyssen JP, Meldgaard M, Szecsi PB, Stender S, Johansen JD, Linneberg A. No association between loss-of-function mutations in filaggrin and diabetes, cardiovascular disease, and all-cause mortality. *PLoS One.* 2013;8(12):e84293. doi:[10.1371/journal.pone.0084293](https://doi.org/10.1371/journal.pone.0084293)

53. Zhang J, Weng W, Wang K, Lu X, Cai L, Sun J. The role of FGF21 in type 1 diabetes and its complications. *Int J Biol Sci.* 2018;14(9):1000-1011. doi:[10.7150/ijbs.25026](https://doi.org/10.7150/ijbs.25026)
54. Hartz CS, Nieman KM, Jacobs RL, Vance DE, Schalinske KL. Hepatic phosphatidylethanolamine N-methyltransferase expression is increased in diabetic rats. *J Nutr.* 2006;136(12):3005-3009. doi:[10.1093/jn/136.12.3005](https://doi.org/10.1093/jn/136.12.3005)
55. Słomiński B, Ryba-Stanisławowska M, Skrzypkowska M, Gabig-Cimińska M, Myśliwiec M. A new potential mode of cardiorenal protection of KLOTHO gene variability in type 1 diabetic adolescents. *J Mol Med (Berl).* 2020;98(7):955-962. doi:[10.1007/s00109-020-01918-7](https://doi.org/10.1007/s00109-020-01918-7)
56. Johansson BB, Torsvik J, Bjørkhaug L, Vesterhus M, Ragvin A, Tjora E, Fjeld K, Hoem D, Johansson S, Ræder H, et al. Diabetes and pancreatic exocrine dysfunction due to mutations in the carboxyl ester lipase gene-maturity onset diabetes of the young (CEL-MODY): a protein misfolding disease. *J Biol Chem.* 2011;286(40):34593-34605. doi:[10.1074/jbc.M111.222679](https://doi.org/10.1074/jbc.M111.222679)
57. Pan S, Li M, Yu H, Xie Z, Li X, Duan X, Huang G, Zhou Z. microRNA-143-3p contributes to inflammatory reactions by targeting FOSL2 in PBMCs from patients with autoimmune diabetes mellitus. *Acta Diabetol.* 2021;58(1):63-72. doi:[10.1007/s00592-020-01591-9](https://doi.org/10.1007/s00592-020-01591-9)
58. Lopez-Sanz L, Bernal S, Recio C, Lazaro I, Oguiza A, Melgar A, Jimenez-Castilla L, Egido J, Gomez-Guerrero C. SOCS1-targeted therapy ameliorates renal and vascular oxidative stress in diabetes via STAT1 and PI3K inhibition. *Lab Invest.* 2018;98(10):1276-1290. doi:[10.1038/s41374-018-0043-6](https://doi.org/10.1038/s41374-018-0043-6)
59. Grant SFA. The TCF7L2 Locus: A Genetic Window Into the Pathogenesis of Type 1 and Type 2 Diabetes. *Diabetes Care.* 2019;42(9):1624-1629. doi:[10.2337/dci19-0001](https://doi.org/10.2337/dci19-0001)
60. Słomiński B, Skrzypkowska M, Ryba-Stanisławowska M, Myśliwiec M, Trzonkowski P. Associations of TP53 codon 72 polymorphism with complications and comorbidities in patients with type 1 diabetes. *J Mol Med (Berl).* 2021;99(5):675-683. doi:[10.1007/s00109-020-02035-1](https://doi.org/10.1007/s00109-020-02035-1)
61. Galán M, Kassan M, Choi SK, Partyka M, Trebak M, Henrion D, Matrougui K. A novel role for epidermal growth factor receptor tyrosine kinase and its downstream endoplasmic reticulum stress in cardiac damage and



- microvascular dysfunction in type 1 diabetes mellitus. *Hypertension*. 2012;60(1):71-80. doi:[10.1161/HYPERTENSIONAHA.112.192500](https://doi.org/10.1161/HYPERTENSIONAHA.112.192500)
62. Jordan MA, Poulton LD, Fletcher JM, Baxter AG. Allelic variation of Ets1 does not contribute to NK and NKT cell deficiencies in type 1 diabetes susceptible NOD mice. *Rev Diabet Stud*. 2009;6(2):104-116. doi:[10.1900/RDS.2009.6.104](https://doi.org/10.1900/RDS.2009.6.104)
63. Winkler M, Lutz R, Russ U, Quast U, Bryan J. Analysis of two KCNJ11 neonatal diabetes mutations, V59G and V59A, and the analogous KCNJ8 I60G substitution: differences between the channel subtypes formed with SUR1. *J Biol Chem*. 2009;284(11):6752-6762. doi:[10.1074/jbc.M805435200](https://doi.org/10.1074/jbc.M805435200)
64. Yip L, Fuhlbrigge R, Taylor C, Creusot RJ, Nishikawa-Matsumura T, Whiting CC, Schartner JM, Akter R, von Herrath M, Fathman CG. Inflammation and hyperglycemia mediate Deaf1 splicing in the pancreatic lymph nodes via distinct pathways during type 1 diabetes. *Diabetes*. 2015;64(2):604-617. doi:[10.2337/db14-0803](https://doi.org/10.2337/db14-0803)
65. Crookshank JA, Serrano D, Wang GS, Patrick C, Morgan BS, Paré MF, Scott FW. Changes in insulin, glucagon and ER stress precede immune activation in type 1 diabetes. *J Endocrinol*. 2018;239(2):181-195. doi:[10.1530/JOE-18-0328](https://doi.org/10.1530/JOE-18-0328)
66. Lempainen J, Härkönen T, Laine A, Knip M, Ilonen J; Finnish Pediatric Diabetes Register. Associations of polymorphisms in non-HLA loci with autoantibodies at the diagnosis of type 1 diabetes: INS and IKZF4 associate with insulin autoantibodies. *Pediatr Diabetes*. 2013;14(7):490-496. doi:[10.1111/pedi.12046](https://doi.org/10.1111/pedi.12046)
67. Qu HQ, Polychronakos C; Type I Diabetes Genetics Consortium. Reassessment of the type I diabetes association of the OAS1 locus. *Genes Immun*. 2009;10 Suppl 1(Suppl 1):S69-S73. doi:[10.1038/gene.2009.95](https://doi.org/10.1038/gene.2009.95)
68. Morrison VA, Onengut-Gumuscu S, Concannon P. A functional variant of IRS1 is associated with type 1 diabetes in families from the US and UK. *Mol Genet Metab*. 2004;81(4):291-294. doi:[10.1016/j.ymgme.2003.10.018](https://doi.org/10.1016/j.ymgme.2003.10.018)
69. Zhang D, Ding Y, Wang X, Xin W, Du W, Chen W, Zhang X, Li P. Effects of ABCG2 and SLCO1B1 gene variants on inflammation markers in patients with hypercholesterolemia and diabetes mellitus treated with rosuvastatin.

- Eur J Clin Pharmacol. 2020;76(7):939-946. doi:[10.1007/s00228-020-02882-4](https://doi.org/10.1007/s00228-020-02882-4)
70. Gerlinger-Romero F, Yonamine CY, Junior DC, Esteves JV, Machado UF. Dysregulation between TRIM63/FBXO32 expression and soleus muscle wasting in diabetic rats: potential role of miR-1-3p, -29a/b-3p, and -133a/b-3p. *Mol Cell Biochem.* 2017;427(1-2):187-199. doi:[10.1007/s11010-016-2910-z](https://doi.org/10.1007/s11010-016-2910-z)
71. Belanger K, Nutter CA, Li J, Yu P, Kuyumcu-Martinez MN. A developmentally regulated spliced variant of PTBP1 is upregulated in type 1 diabetic hearts. *Biochem Biophys Res Commun.* 2019;509(2):384-389. doi:[10.1016/j.bbrc.2018.12.150](https://doi.org/10.1016/j.bbrc.2018.12.150)
72. Dieter C, Lemos NE, Dorfman LE, Duarte GCK, Assmann TS, Crispim D. The rs11755527 polymorphism in the BACH2 gene and type 1 diabetes mellitus: case control study in a Brazilian population. *Arch Endocrinol Metab.* 2020;64(2):138-143. doi:[10.20945/2359-3997000000214](https://doi.org/10.20945/2359-3997000000214)
73. Wanic K, Placha G, Dunn J, Smiles A, Warram JH, Krolewski AS. Exclusion of polymorphisms in carnosinase genes (CNDP1 and CNDP2) as a cause of diabetic nephropathy in type 1 diabetes: results of large case-control and follow-up studies. *Diabetes.* 2008;57(9):2547-2551. doi:[10.2337/db07-1303](https://doi.org/10.2337/db07-1303)
74. Ushijima K, Narumi S, Ogata T, Yokota I, Sugihara S, Kaname T, Horikawa Y, Matsubara Y, Fukami M, Kawamura T;KLF11 variant in a family clinically diagnosed with early childhood-onset type 1B diabetes. *Pediatr Diabetes.* 2019;20(6):712-719. doi:[10.1111/pedi.12868](https://doi.org/10.1111/pedi.12868)
75. Guo M, Zhang T, Dong X, Xiang JZ, Lei M, Evans T, Graumann J, Chen S. Using hESCs to Probe the Interaction of the Diabetes-Associated Genes CDKAL1 and MT1E. *Cell Rep.* 2017;19(8):1512-1521. doi:[10.1016/j.celrep.2017.04.070](https://doi.org/10.1016/j.celrep.2017.04.070)
76. Davis H, Jones Briscoe V, Dumbadze S, Davis SN. Using DPP-4 inhibitors to modulate beta cell function in type 1 diabetes and in the treatment of diabetic kidney disease. *Expert Opin Investig Drugs.* 2019;28(4):377-388. doi:[10.1080/13543784.2019.1592156](https://doi.org/10.1080/13543784.2019.1592156)
77. Elbarbary NS, Tjora E, Molnes J, Lie BA, Habib MA, Salem MA, Njølstad PR. An Egyptian family with H syndrome due to a novel mutation in SLC29A3 illustrating overlapping features with pigmented hypertrichotic



dermatosis with insulin-dependent diabetes and Faisalabad histiocytosis. *Pediatr Diabetes*. 2013;14(6):466-472. doi:[10.1111/j.1399-5448.2012.00925.x](https://doi.org/10.1111/j.1399-5448.2012.00925.x)

78. Villasenor A, Wang ZV, Rivera LB, Ocal O, Asterholm IW, Scherer PE, Brekken RA, Cleaver O, Wilkie TM. Rgs16 and Rgs8 in embryonic endocrine pancreas and mouse models of diabetes. *Dis Model Mech*. 2010;3(9-10):567-580. doi:[10.1242/dmm.003210](https://doi.org/10.1242/dmm.003210)
79. Zhang L, Londono P, Yu L, Grimes S, Blackburn P, Gottlieb P, Eisenbarth GS. MAS-1 adjuvant immunotherapy generates robust Th2 type and regulatory immune responses providing long-term protection from diabetes in late-stage pre-diabetic NOD mice. *Autoimmunity*. 2014;47(5):341-350. doi:[10.3109/08916934.2014.910768](https://doi.org/10.3109/08916934.2014.910768)
80. Lee Y, Wang MY, Du XQ, Charron MJ, Unger RH. Glucagon receptor knockout prevents insulin-deficient type 1 diabetes in mice. *Diabetes*. 2011;60(2):391-397. doi:[10.2337/db10-0426](https://doi.org/10.2337/db10-0426)
81. Zhi D, Sun C, Sedimbi SK, Luo F, Shen S, Sanjeevi CB. Killer cell immunoglobulin-like receptor along with HLA-C ligand genes are associated with type 1 diabetes in Chinese Han population. *Diabetes Metab Res Rev*. 2011;27(8):872-877. doi:[10.1002/dmrr.1264](https://doi.org/10.1002/dmrr.1264)
82. Li Calzi S, Purich DL, Chang KH, Afzal A, Nakagawa T, Busik JV, Agarwal A, Segal MS, Grant MB. Carbon monoxide and nitric oxide mediate cytoskeletal reorganization in microvascular cells via vasodilator-stimulated phosphoprotein phosphorylation: evidence for blunted responsiveness in diabetes. *Diabetes*. 2008;57(9):2488-2494. doi:[10.2337/db08-0381](https://doi.org/10.2337/db08-0381)
83. Sebastiani G, Ventriglia G, Stabilini A, Socci C, Morsiani C, Laurenzi A, Nigi L, Formichi C, Mfarrej B, Petrelli A, et al. Regulatory T-cells from pancreatic lymphnodes of patients with type-1 diabetes express increased levels of microRNA miR-125a-5p that limits CCR2 expression. *Sci Rep*. 2017;7(1):6897. doi:[10.1038/s41598-017-07172-1](https://doi.org/10.1038/s41598-017-07172-1)
84. Cherney DZ, Miller JA, Scholey JW, Nasrallah R, Hébert RL, Dekker MG, Slorach C, Sochett EB, Bradley TJ. Renal hyperfiltration is a determinant of endothelial function responses to cyclooxygenase 2 inhibition in type 1 diabetes. *Diabetes Care*. 2010;33(6):1344-1346. doi:[10.2337/dc09-2340](https://doi.org/10.2337/dc09-2340)

85. Doggrell SA. Do glucagon-like peptide-1 receptor (GLP-1R) agonists have potential as adjuncts in the treatment of type 1 diabetes?. *Expert Opin Pharmacother.* 2018;19(15):1655-1661. doi:[10.1080/14656566.2018.1519547](https://doi.org/10.1080/14656566.2018.1519547)
86. Yanagihara T, Tomino T, Uruno T, Fukui Y. Thymic epithelial cell-specific deletion of *Jmjd6* reduces Aire protein expression and exacerbates disease development in a mouse model of autoimmune diabetes. *Biochem Biophys Res Commun.* 2017;489(1):8-13. doi:[10.1016/j.bbrc.2017.05.113](https://doi.org/10.1016/j.bbrc.2017.05.113)
87. Vassilev P, Pantoja-Urban AH, Giroux M, Nouel D, Hernandez G, Orsini T, Flores C. Unique effects of social defeat stress in adolescent male mice on the Netrin-1/DCC pathway, prefrontal cortex dopamine and cognition (Social stress in adolescent vs. adult male mice). *eNeuro.* 2021;8(2):ENEURO.0045-21.2021. doi:[10.1523/ENEURO.0045-21.2021](https://doi.org/10.1523/ENEURO.0045-21.2021)
88. Qin W, Gao J, Xing Q, Yang J, Qian X, Li X, Guo Z, Chen H, Wang L, Huang X, et al. A family-based association study of PLP1 and schizophrenia. *Neurosci Lett.* 2005;375(3):207-210. doi:[10.1016/j.neulet.2004.11.013](https://doi.org/10.1016/j.neulet.2004.11.013)
89. Ma L, Semick SA, Chen Q, Li C, Tao R, Price AJ, Shin JH, Jia Y. Schizophrenia risk variants influence multiple classes of transcripts of sorting nexin 19 (SNX19). *Mol Psychiatry.* 2020;25(4):831-843. doi:[10.1038/s41380-018-0293-0](https://doi.org/10.1038/s41380-018-0293-0)
90. West RJH, Ugbo C, Gao FB, Sweeney ST. The pro-apoptotic JNK scaffold POSH/SH3RF1 mediates CHMP2B Intron5-associated toxicity in animal models of frontotemporal dementia. *Hum Mol Genet.* 2018;27(8):1382-1395. doi:[10.1093/hmg/ddy048](https://doi.org/10.1093/hmg/ddy048)
91. Hoffmann LA, Lohse P, König FB, Feneberg W, Hohlfeld R, Kümpfel T. TNFRSF1A R92Q mutation in association with a multiple sclerosis-like demyelinating syndrome. *Neurology.* 2008;70(13 Pt 2):1155-1156. doi:[10.1212/01.wnl.0000296279.98236.8a](https://doi.org/10.1212/01.wnl.0000296279.98236.8a)
92. Deary IJ, Hamilton G, Hayward C, Whalley LJ, Powell J, Starr JM, Lovestone S. Nicastrin gene polymorphisms, cognitive ability level and cognitive ageing. *Neurosci Lett.* 2005;373(2):110-114. doi:[10.1016/j.neulet.2004.09.073](https://doi.org/10.1016/j.neulet.2004.09.073)
93. Belangero SI, Ota VK, Gadelha A, Berberian AA, Assunção-Leme IB, Noto C, Christofolini DM, Bellucco FT, Santoro ML, Mazzotti DR, et al. DGCR2

- influences cortical thickness through a mechanism independent of schizophrenia pathogenesis. *Psychiatry Res.* 2019;274:391-394. doi:[10.1016/j.psychres.2019.02.068](https://doi.org/10.1016/j.psychres.2019.02.068)
94. Jung JS, Lee HJ, Cho CH, Kang SG, Yoon HK, Park YM, Moon JH, Yang HJ, Song HM, Kim L. Association between restless legs syndrome and CLOCK and NPAS2 gene polymorphisms in schizophrenia. *Chronobiol Int.* 2014;31(7):838-844. doi:[10.3109/07420528.2014.914034](https://doi.org/10.3109/07420528.2014.914034)
95. Tang T, Li Y, Jiao Q, Du X, Jiang H. Cerebral Dopamine Neurotrophic Factor: A Potential Therapeutic Agent for Parkinson's Disease. *Neurosci Bull.* 2017;33(5):568-575. doi:[10.1007/s12264-017-0123-4](https://doi.org/10.1007/s12264-017-0123-4)
96. Goodier JL, Soares AO, Pereira GC, DeVine LR, Sanchez L, Cole RN, García-Pérez JL. C9orf72-associated SMCR8 protein binds in the ubiquitin pathway and with proteins linked with neurological disease. *Acta Neuropathol Commun.* 2020;8(1):110. doi:[10.1186/s40478-020-00982-x](https://doi.org/10.1186/s40478-020-00982-x)
97. Petyuk VA, Chang R, Ramirez-Restrepo M, Beckmann ND, Henrion MYR, Piehowski PD, Zhu K, Wang S, Clarke J, Huentelman MJ, et al. The human brainome: network analysis identifies HSPA2 as a novel Alzheimer's disease target. *Brain.* 2018;141(9):2721-2739. doi:[10.1093/brain/awy215](https://doi.org/10.1093/brain/awy215)
98. Roux T, Barbier M, Papin M, Davoine CS, Sayah S, Coarelli G, Charles P, Marelli C, Parodi L, Tranchant C, et al. Clinical, neuropathological, and genetic characterization of STUB1 variants in cerebellar ataxias: a frequent cause of predominant cognitive impairment. *Genet Med.* 2020;22(11):1851-1862. doi:[10.1038/s41436-020-0899-x](https://doi.org/10.1038/s41436-020-0899-x)
99. Castrogiovanni P, Sanfilippo C, Imbesi R, Maugeri G, Lo Furno D, Tibullo D, Castorina A, Musumeci G, Di Rosa M. Brain CHD1 Expression Correlates with NRGN and CALB1 in Healthy Subjects and AD Patients. *Cells.* 2021;10(4):882. doi:[10.3390/cells10040882](https://doi.org/10.3390/cells10040882)
100. Suleiman J, Hamwi N, El-Hattab AW. ATP13A2 novel mutations causing a rare form of juvenile-onset Parkinson disease. *Brain Dev.* 2018;40(9):824-826. doi:[10.1016/j.braindev.2018.05.017](https://doi.org/10.1016/j.braindev.2018.05.017)
101. Haack TB, Ignatius E, Calvo-Garrido J, Iuso A, Isohanni P, Maffezzini C, Lönnqvist T, Suomalainen A, Gorza M, Kremer LS, et al. Absence of the Autophagy Adaptor SQSTM1/p62 Causes Childhood-Onset Neurodegeneration with Ataxia, Dystonia, and Gaze Palsy. *Am J Hum Genet.* 2016;99(3):735-743. doi:[10.1016/j.ajhg.2016.06.026](https://doi.org/10.1016/j.ajhg.2016.06.026)

102. Kwiatkowski D, Czarny P, Toma M, Korycinska A, Sowinska K, Galecki P, Bachurska A, Bielecka-Kowalska A, Szemraj J, Maes M, et al. Association between Single-Nucleotide Polymorphisms of the hOGG1, NEIL1, APEX1, FEN1, LIG1, and LIG3 Genes and Alzheimer's Disease Risk. *Neuropsychobiology*. 2016;73(2):98-107. doi:[10.1159/000444643](https://doi.org/10.1159/000444643)
103. Pinacho R, Valdizán EM, Pilar-Cuellar F, Prades R, Tarragó T, Haro JM, Ferrer I, Ramos B. Increased SP4 and SP1 transcription factor expression in the postmortem hippocampus of chronic schizophrenia. *J Psychiatr Res*. 2014;58:189-196. doi:[10.1016/j.jpsychires.2014.08.006](https://doi.org/10.1016/j.jpsychires.2014.08.006)
104. Luo XJ, Diao HB, Wang JK, Zhang H, Zhao ZM, Su B. Association of haplotypes spanning PDZ-GEF2, LOC728637 and ACSL6 with schizophrenia in Han Chinese. *J Med Genet*. 2008;45(12):818-826. doi:[10.1136/jmg.2008.060657](https://doi.org/10.1136/jmg.2008.060657)
105. He L, Loika Y, Park Y; Bennett DA, Kellis M, Kulminski AM. Exome-wide age-of-onset analysis reveals exonic variants in ERN1 and SPPL2C associated with Alzheimer's disease. *Transl Psychiatry*. 2021;11(1):146. doi:[10.1038/s41398-021-01263-4](https://doi.org/10.1038/s41398-021-01263-4)
106. Moudi M, Sargazi S, Heidari Nia M, Saravani R, Shirvaliloo M, Shakiba M. Polymorphism in the 3'-UTR of LIF but Not in the ATF6B Gene Associates with Schizophrenia Susceptibility: a Case-Control Study and In Silico Analyses. *J Mol Neurosci*. 2020;70(12):2093-2101. doi:[10.1007/s12031-020-01616-6](https://doi.org/10.1007/s12031-020-01616-6)
107. Thevenon J, Souchay C, Seabold GK, Dygai-Cochet I, Callier P, Gay S, Corbin L, Duplomb L, Thauvin-Robinet C, Masurel-Paulet A, et al. Heterozygous deletion of the LRFN2 gene is associated with working memory deficits. *Eur J Hum Genet*. 2016;24(6):911-918. doi:[10.1038/ejhg.2015.221](https://doi.org/10.1038/ejhg.2015.221)
108. Li Z, Liu L, Lin W, Zhou Y, Zhang G, Du X, Li Y, Tang W, Zhang X. NRG3 contributes to cognitive deficits in chronic patients with schizophrenia. *Schizophr Res*. 2020;215:134-139. doi:[10.1016/j.schres.2019.10.060](https://doi.org/10.1016/j.schres.2019.10.060)
109. Reitz C, Conrad C, Roszkowski K, Rogers RS, Mayeux R. Effect of genetic variation in LRRTM3 on risk of Alzheimer disease. *Arch Neurol*. 2012;69(7):894-900. doi:[10.1001/archneurol.2011.2463](https://doi.org/10.1001/archneurol.2011.2463)

110. Jenkins A, Escayg A. Reply: Novel GABRA2 variants in epileptic encephalopathy and intellectual disability with seizures. *Brain*. 2019;142(5):e16. doi:[10.1093/brain/awz086](https://doi.org/10.1093/brain/awz086)
111. Letronne F, Laumet G, Ayral AM, Chapuis J, Demiautte F, Laga M, Vandenberghe ME, Malmanche N, Leroux F, Eysert F, et al. ADAM30 Downregulates APP-Linked Defects Through Cathepsin D Activation in Alzheimer's Disease. *EBioMedicine*. 2016;9:278-292. doi:[10.1016/j.ebiom.2016.06.002](https://doi.org/10.1016/j.ebiom.2016.06.002)
112. Ma Z, Niu B, Shi Z, Li J, Wang J, Zhang F, Gao X, Zhang K. Genetic Polymorphism of GABRR2 Modulates Individuals' General Cognitive Ability in Healthy Chinese Han People. *Cell Mol Neurobiol*. 2017;37(1):93-100. doi:[10.1007/s10571-016-0347-2](https://doi.org/10.1007/s10571-016-0347-2)
113. Chabbert D, Caubit X, Roubertoux PL, Carlier M, Habermann B, Jacq B, Salin P, Metwaly M, Frahm C, Fatmi A, et al. Postnatal Tshz3 Deletion Drives Altered Corticostriatal Function and Autism Spectrum Disorder-like Behavior. *Biol Psychiatry*. 2019;86(4):274-285. doi:[10.1016/j.biopsych.2019.03.974](https://doi.org/10.1016/j.biopsych.2019.03.974)
114. Abramsson A, Landgren S, Zetterberg M, Seibt Palmer M, Minthon L, Gustafson DR, Skoog I, Blennow K, Zetterberg H. No association of LOXL1 gene polymorphisms with Alzheimer's disease. *Neuromolecular Med*. 2011;13(2):160-166. doi:[10.1007/s12017-011-8144-z](https://doi.org/10.1007/s12017-011-8144-z)
115. Aeby A, Sculier C, Bouza AA, Askar B, Lederer D, Schoonjans AS, Vander Ghinst M, Ceulemans B, Offord J, Lopez-Santiago LF, et al. SCN1B-linked early infantile developmental and epileptic encephalopathy. *Ann Clin Transl Neurol*. 2019;6(12):2354-2367. doi:[10.1002/acn3.50921](https://doi.org/10.1002/acn3.50921)
116. Roll P, Rudolf G, Pereira S, Royer B, Scheffer IE, Massacrier A, Valenti MP, Roeckel-Trevisiol N, Jamali S, Beclin C, et al. SRPX2 mutations in disorders of language cortex and cognition. *Hum Mol Genet*. 2006;15(7):1195-1207. doi:[10.1093/hmg/ddl035](https://doi.org/10.1093/hmg/ddl035)
117. Soofi A, Wolf KI, Emont MP, Qi N, Martinez-Santibanez G, Grimley E, Ostwani W, Dressler GR. The kielin/chordin-like protein (KCP) attenuates high-fat diet-induced obesity and metabolic syndrome in mice. *J Biol Chem*. 2017;292(22):9051-9062. doi:[10.1074/jbc.M116.771428](https://doi.org/10.1074/jbc.M116.771428)
118. Blázquez-Medela AM, Jumabay M, Rajbhandari P, Sallam T, Guo Y, Yao J, Vergnes L, Reue K, Zhang L, Yao Y, et al. Noggin depletion in



- adipocytes promotes obesity in mice. *Mol Metab.* 2019;25:50-63. doi:[10.1016/j.molmet.2019.04.004](https://doi.org/10.1016/j.molmet.2019.04.004)
119. McCulloch LJ, Rawling TJ, Sjöholm K, Franck N, Dankel SN, Price EJ, Knight B, Liversedge NH, Mellgren G, Nystrom F, et al. COL6A3 is regulated by leptin in human adipose tissue and reduced in obesity. *Endocrinology.* 2015;156(1):134-146. doi:[10.1210/en.2014-1042](https://doi.org/10.1210/en.2014-1042)
120. Gan M, Shen L, Wang S, Guo Z, Zheng T, Tan Y, Fan Y, Liu L, Chen L, Jiang A, et al. Genistein inhibits high fat diet-induced obesity through miR-222 by targeting BTG2 and adipor1. *Food Funct.* 2020;11(3):2418-2426. doi:[10.1039/c9fo00861f](https://doi.org/10.1039/c9fo00861f)
121. Han X, Guo J, You Y, Zhan J, Huang W. p-Coumaric acid prevents obesity via activating thermogenesis in brown adipose tissue mediated by mTORC1-RPS6. *FASEB J.* 2020;34(6):7810-7824. doi:[10.1096/fj.202000333R](https://doi.org/10.1096/fj.202000333R)
122. Wang G, Wu B, Cui Y, Zhang B, Jiang C, Wang H. Teneligliptin Promotes Bile Acid Synthesis and Attenuates Lipid Accumulation in Obese Mice by Targeting the KLF15-Fgf15 Pathway. *Chem Res Toxicol.* 2020;33(8):2164-2171. doi:[10.1021/acs.chemrestox.0c00192](https://doi.org/10.1021/acs.chemrestox.0c00192)
123. Zhou X, Shi X, Wang J, Zhang X, Xu Y, Liu Y, Li X, Yang G, et al. miR-324-5p promotes adipocyte differentiation and lipid droplet accumulation by targeting Krueppel-like factor 3 (KLF3). *J Cell Physiol.* 2020;235(10):7484-7495. doi:[10.1002/jcp.29652](https://doi.org/10.1002/jcp.29652)
124. Caracciolo V, Young J, Gonzales D, Ni Y, Flowers SJ, Summer R, Waldman SA, Kim JK, Jung DY, Noh HL, et al. Myeloid-specific deletion of Zfp36 protects against insulin resistance and fatty liver in diet-induced obese mice. *Am J Physiol Endocrinol Metab.* 2018;315(4):E676-E693. doi:[10.1152/ajpendo.00224.2017](https://doi.org/10.1152/ajpendo.00224.2017)
125. Lv D, Zhou D, Zhang Y, Zhang S, Zhu YM. Two obesity susceptibility loci in LYPLAL1 and ETV5 independently associated with childhood hypertension in Chinese population. *Gene.* 2017;627:284-289. doi:[10.1016/j.gene.2017.06.030](https://doi.org/10.1016/j.gene.2017.06.030)
126. Pearson S, Loft A, Rajbhandari P, Simcox J, Lee S, Tontonoz P, Mandrup S, Villanueva CJ. Loss of TLE3 promotes the mitochondrial program in beige adipocytes and improves glucose metabolism. *Genes Dev.* 2019;33(13-14):747-762. doi:[10.1101/gad.321059.118](https://doi.org/10.1101/gad.321059.118)

127. Brachs S, Polack J, Brachs M, Jahn-Hofmann K, Elvert R, Pfenninger A, Bärenz F, Margerie D, Mai K, Spranger J, et al. Genetic Nicotinamide N-Methyltransferase (Nnmt) Deficiency in Male Mice Improves Insulin Sensitivity in Diet-Induced Obesity but Does Not Affect Glucose Tolerance. *Diabetes*. 2019;68(3):527-542. doi:[10.2337/db18-0780](https://doi.org/10.2337/db18-0780)
128. Lai CQ, Parnell LD, Arnett DK, García-Bailo B, Tsai MY, Kabagambe EK, Straka RJ, Province MA, An P, Borecki IB, et al. WDT1, the ortholog of Drosophila adipose gene, associates with human obesity, modulated by MUFA intake. *Obesity (Silver Spring)*. 2009;17(3):593-600. doi:[10.1038/oby.2008.561](https://doi.org/10.1038/oby.2008.561)
129. Yang SA. Association study between ZFH3 gene polymorphisms and obesity in Korean population. *J Exerc Rehabil*. 2017;13(4):491-494. doi:[10.12965/jer.1735080.540](https://doi.org/10.12965/jer.1735080.540)
130. Kilroy G, Carter LE, Newman S, Burk DH, Manuel J, Möller A, Bowtell DD, Mynatt RL, Ghosh S, Floyd ZE. The ubiquitin ligase Siah2 regulates obesity-induced adipose tissue inflammation. *Obesity (Silver Spring)*. 2015;23(11):2223-2232. doi:[10.1002/oby.21220](https://doi.org/10.1002/oby.21220)
131. Zusi C, Morandi A, Maguolo A, Corradi M, Costantini S, Mosca A, Crudele A, Mantovani A, Alisi A, Miraglia Del Giudice E, et al. Association between MBOAT7 rs641738 polymorphism and non-alcoholic fatty liver in overweight or obese children. *Nutr Metab Cardiovasc Dis*. 2021;31(5):1548-1555. doi:[10.1016/j.numecd.2021.01.020](https://doi.org/10.1016/j.numecd.2021.01.020)
132. Zhou Y, Hambly BD, Simmons D, McLachlan CS. RUNX1T1 rs34269950 is associated with obesity and metabolic syndrome. *QJM*. 2020;hcaa208. doi:[10.1093/qjmed/hcaa208](https://doi.org/10.1093/qjmed/hcaa208)
133. Gao Y, Wang Y, Chen X, Peng Y, Chen F, He Y, Pang W, Yang G, Yu T. MiR-127 attenuates adipogenesis by targeting MAPK4 and HOXC6 in porcine adipocytes. *J Cell Physiol*. 2019;234(12):21838-21850. doi:[10.1002/jcp.28660](https://doi.org/10.1002/jcp.28660)
134. Wei Z, Qin X, Kang X, Zhou H, Wang S, Wei D. MiR-142-3p inhibits adipogenic differentiation and autophagy in obesity through targeting KLF9. *Mol Cell Endocrinol*. 2020;518:111028. doi:[10.1016/j.mce.2020.111028](https://doi.org/10.1016/j.mce.2020.111028)



135. Randi EB, Casili G, Jacquemai S, Szabo C. Selenium-Binding Protein 1 (SELENBP1) Supports Hydrogen Sulfide Biosynthesis and Adipogenesis. *Antioxidants* (Basel). 2021;10(3):361. doi:[10.3390/antiox10030361](https://doi.org/10.3390/antiox10030361)
136. Yoshino S, Satoh T, Yamada M, Hashimoto K, Tomaru T, Katano-Toki A, Kakizaki S, Okada S, Shimizu H, Ozawa A, et al. Protection against high-fat diet-induced obesity in Helz2-deficient male mice due to enhanced expression of hepatic leptin receptor. *Endocrinology*. 2014;155(9):3459-3472. doi:[10.1210/en.2013-2160](https://doi.org/10.1210/en.2013-2160)
137. Pang L, You L, Ji C, Shi C, Chen L, Yang L, Huang F, Zhou Y, Zhang J, Chen X, et al. miR-1275 inhibits adipogenesis via ELK1 and its expression decreases in obese subjects. *J Mol Endocrinol*. 2016;57(1):33-43. doi:[10.1530/JME-16-0007](https://doi.org/10.1530/JME-16-0007)
138. Chen C, Deng Y, Hu X, Ren H, Zhu J, Fu S, Xie J, Peng Y. miR-128-3p regulates 3T3-L1 adipogenesis and lipolysis by targeting Pparg and Sertad2. *J Physiol Biochem*. 2018;74(3):381-393. doi:[10.1007/s13105-018-0625-1](https://doi.org/10.1007/s13105-018-0625-1)
139. Prats-Puig A, Soriano-Rodríguez P, Oliveras G, Carreras-Badosa G, España S, Díaz-Roldán F, de Zegher F, Ibáñez L, Bassols J, Puig T, et al. Soluble CRT3: A Newly Identified Protein Released by Adipose Tissue That Is Associated with Childhood Obesity. *Clin Chem*. 2016;62(3):476-484. doi:[10.1373/clinchem.2015.249136](https://doi.org/10.1373/clinchem.2015.249136)
140. Henkel AS, Kavesh MH, Kriss MS, Dewey AM, Rinella ME, Green RM. Hepatic overexpression of abcb11 promotes hypercholesterolemia and obesity in mice. *Gastroenterology*. 2011;141(4):1404-1411.e14112. doi:[10.1053/j.gastro.2011.06.062](https://doi.org/10.1053/j.gastro.2011.06.062)
141. Klötting N, Wilke B, Klötting I. Alleles on rat chromosome 4 (D4Got41-Fabp1/Tacr1) regulate subphenotypes of obesity. *Obes Res*. 2005;13(3):589-595. doi:[10.1038/oby.2005.63](https://doi.org/10.1038/oby.2005.63)
142. Giri AK, Prasad G, Bandesh K, Parekatt V, Mahajan A, Banerjee P, Kauser Y, Chakraborty S, Rajashekar D; Multifaceted genome-wide study identifies novel regulatory loci in SLC22A11 and ZNF45 for body mass index in Indians. *Mol Genet Genomics*. 2020;295(4):1013-1026. doi:[10.1007/s00438-020-01678-6](https://doi.org/10.1007/s00438-020-01678-6)
143. Samblas M, Milagro FI, Mansego ML, Marti A, Martinez JA; GENOI members. PTPRS and PER3 methylation levels are associated with

- childhood obesity: results from a genome-wide methylation analysis. *Pediatr Obes.* 2018;13(3):149-158. doi:[10.1111/ijpo.12224](https://doi.org/10.1111/ijpo.12224)
144. Ussar S, Lee KY, Dankel SN, Boucher J, Haering MF, Kleinridders A, Thomou T, Xue R, Macotela Y, Cypess AM, et al. ASC-1, PAT2, and P2RX5 are cell surface markers for white, beige, and brown adipocytes. *Sci Transl Med.* 2014;6(247):247ra103. doi:[10.1126/scitranslmed.3008490](https://doi.org/10.1126/scitranslmed.3008490)
145. Vaittinen M, Kolehmainen M, Rydén M, Eskelinen M, Wabitsch M, Pihlajamäki J, Uusitupa M, Pulkkinen L. MFAP5 is related to obesity-associated adipose tissue and extracellular matrix remodeling and inflammation. *Obesity (Silver Spring).* 2015;23(7):1371-1378. doi:[10.1002/oby.21103](https://doi.org/10.1002/oby.21103)
146. Wu HT, Chen SC, Fan KC, Kuo CH, Lin SY, Wang SH, Chang CJ, Li HY. Targeting fibrinogen-like protein 1 is a novel therapeutic strategy to combat obesity. *FASEB J.* 2020;34(2):2958-2967. doi:[10.1096/fj.201901925R](https://doi.org/10.1096/fj.201901925R)
147. Albuquerque D, Nóbrega C, Rodríguez-López R, Manco L. Association study of common polymorphisms in MSRA, TFAP2B, MC4R, NRXN3, PPARGC1A, TMEM18, SEC16B, HOXB5 and OLFM4 genes with obesity-related traits among Portuguese children. *J Hum Genet.* 2014;59(6):307-313. doi:[10.1038/jhg.2014.23](https://doi.org/10.1038/jhg.2014.23)
148. Sharma M, Schlegel M, Brown EJ, Sansbury BE, Weinstock A, Afonso MS, Corr EM, van Solingen C, Shanley LC, Peled D, et al. Netrin-1 Alters Adipose Tissue Macrophage Fate and Function in Obesity. *Immunometabolism.* 2019;1(2):e190010. doi:[10.20900/immunometab20190010](https://doi.org/10.20900/immunometab20190010)
149. Guclu-Geyik F, Coban N, Can G, Erginel-Unaltuna N. The rs2175898 Polymorphism in the ESR1 Gene has a Significant Sex-Specific Effect on Obesity. *Biochem Genet.* 2020;58(6):935-952. doi:[10.1007/s10528-020-09987-6](https://doi.org/10.1007/s10528-020-09987-6)
150. Ichihara S, Yamada Y, Kato K, Hibino T, Yokoi K, Matsuo H, Kojima T, Watanabe S, Metoki N, Yoshida H, et al. Association of a polymorphism of ABCB1 with obesity in Japanese individuals. *Genomics.* 2008;91(6):512-516. doi:[10.1016/j.ygeno.2008.03.004](https://doi.org/10.1016/j.ygeno.2008.03.004)
151. Menacho-Márquez M, Nogueiras R, Fabbiano S, Sauzeau V, Al-Massadi O, Diéguez C, Bustelo XR. Chronic sympathoexcitation through

- loss of Vav3, a Rac1 activator, results in divergent effects on metabolic syndrome and obesity depending on diet. *Cell Metab.* 2013;18(2):199-211. doi:[10.1016/j.cmet.2013.07.001](https://doi.org/10.1016/j.cmet.2013.07.001)
152. Jiao H, Kulyté A, Näslund E, Thorell A, Gerdhem P, Kere J, Arner P, Dahlman I. Whole-Exome Sequencing Suggests LAMB3 as a Susceptibility Gene for Morbid Obesity. *Diabetes.* 2016;65(10):2980-2989. doi:[10.2337/db16-052](https://doi.org/10.2337/db16-052)
153. Qiu Y, Sui X, Zhan Y, Xu C, Li X, Ning Y, Zhi X, Yin L. Steroidogenic acute regulatory protein (StAR) overexpression attenuates HFD-induced hepatic steatosis and insulin resistance. *Biochim Biophys Acta Mol Basis Dis.* 2017;1863(4):978-990. doi:[10.1016/j.bbadis.2017.01.026](https://doi.org/10.1016/j.bbadis.2017.01.026)
154. Margaryan S, Kriegova E, Fillerova R, Smotkova Kraiczova V, Manukyan G. Hypomethylation of IL1RN and NFKB1 genes is linked to the dysbalance in IL1 $\beta$ /IL-1Ra axis in female patients with type 2 diabetes mellitus. *PLoS One.* 2020;15(5):e0233737. doi:[10.1371/journal.pone.0233737](https://doi.org/10.1371/journal.pone.0233737)
155. Gao C, Zhang W. Urinary AQP5 is independently associated with eGFR decline in patients with type 2 diabetes and nephropathy. *Diabetes Res Clin Pract.* 2019;155:107805. doi:[10.1016/j.diabres.2019.107805](https://doi.org/10.1016/j.diabres.2019.107805)
156. Wu J, Tao W, Bu D, Zhao Y, Zhang T, Chong D, Xue B, Xing Z, Li C. Egr-1 transcriptionally activates protein phosphatase PTP1B to facilitate hyperinsulinemia-induced insulin resistance in the liver in type 2 diabetes. *FEBS Lett.* 2019;593(21):3054-3063. doi:[10.1002/1873-3468.13537](https://doi.org/10.1002/1873-3468.13537)
157. Pueyo N, Ortega FJ, Mercader JM, Moreno-Navarrete JM, Sabater M, Bonàs S, Botas P, Delgado E, Ricart W, Martinez-Larrad MT, et al. Common genetic variants of surfactant protein-D (SP-D) are associated with type 2 diabetes. *PLoS One.* 2013;8(4):e60468. doi:[10.1371/journal.pone.0060468](https://doi.org/10.1371/journal.pone.0060468)
158. Gutierrez-Aguilar R, Benmezroua Y, Balkau B, Marre M, Helbecque N, Charpentier G, Polychronakos C, Sladek R, Froguel P, Neve B. Minor contribution of SMAD7 and KLF10 variants to genetic susceptibility of type 2 diabetes. *Diabetes Metab.* 2007;33(5):372-378. doi:[10.1016/j.diabet.2007.06.002](https://doi.org/10.1016/j.diabet.2007.06.002)
159. El-Ashmawy HM, Selim FO, Hosny TAM, Almassry HN. Association of serum podocalyxin levels with peripheral arterial disease in

- patients with type 2 diabetes. *J Diabetes Complications*. 2019;33(7):495-499. doi:[10.1016/j.jdiacomp.2019.04.003](https://doi.org/10.1016/j.jdiacomp.2019.04.003)
160. Erickson ML, Karanth S, Ravussin E, Schlegel A. FOXN3 hyperglycemic risk allele and insulin sensitivity in humans. *BMJ Open Diabetes Res Care*. 2019;7(1):e000688. doi:[10.1136/bmjdr-2019-000688](https://doi.org/10.1136/bmjdr-2019-000688)
161. Wu X, Yu T, Ji N, Huang Y, Gao L, Shi W, Yan Y, Li H, Ma L, Wu K, et al. IL6R inhibits viability and apoptosis of pancreatic beta-cells in type 2 diabetes mellitus via regulation by miR-22 of the JAK/STAT signaling pathway. *Diabetes Metab Syndr Obes*. 2019;12:1645-1657. doi:[10.2147/DMSO.S211700](https://doi.org/10.2147/DMSO.S211700)
162. Duesing K, Charpentier G, Marre M, Tichet J, Hercberg S, Balkau B, Froguel P, Gibson F. Evaluating the association of common PBX1 variants with type 2 diabetes. *BMC Med Genet*. 2008;9:14. doi:[10.1186/1471-2350-9-14](https://doi.org/10.1186/1471-2350-9-14)
163. Do Carmo S, Fournier D, Mounier C, Rassart E. Human apolipoprotein D overexpression in transgenic mice induces insulin resistance and alters lipid metabolism. *Am J Physiol Endocrinol Metab*. 2009;296(4):E802-E811. doi:[10.1152/ajpendo.90725.2008](https://doi.org/10.1152/ajpendo.90725.2008)
164. Dupont S, Hani EH, Cras-Méneur C, De Matos F, Lobbens S, Lecoecur C, Vaxillaire M, Scharfmann R, Froguel P. No evidence for linkage or for diabetes-associated mutations in the activin type 2B receptor gene (ACVR2B) in French patients with mature-onset diabetes of the young or type 2 diabetes. *Diabetes*. 2001;50(5):1219-1221. doi:[10.2337/diabetes.50.5.1219](https://doi.org/10.2337/diabetes.50.5.1219)
165. Tripaldi R, Lanuti P, Simeone PG, Liani R, Bologna G, Ciotti S, Simeone P, Di Castelnuovo A, Marchisio M, Cipollone F, et al. Endogenous PCSK9 may influence circulating CD45neg/CD34bright and CD45neg/CD34bright/CD146neg cells in patients with type 2 diabetes mellitus. *Sci Rep*. 2021;11(1):9659. doi:[10.1038/s41598-021-88941-x](https://doi.org/10.1038/s41598-021-88941-x)
166. Parvin M, Jahan F, Sarkar PK, Howlader ZH, Nabi AHMN, Hosen MI. Functional Polymorphism Located in the microRNA Binding Site of the Insulin Receptor (INSR) Gene Confers Risk for Type 2 Diabetes Mellitus in the Bangladeshi Population. *Biochem Genet*. 2019;57(1):20-33. doi:[10.1007/s10528-018-9872-7](https://doi.org/10.1007/s10528-018-9872-7)

167. Weber KS, Knebel B, Strassburger K, Kotzka J, Stehle P, Szendroedi J, Müssig K, Buyken AE, Roden M. Associations between explorative dietary patterns and serum lipid levels and their interactions with ApoA5 and ApoE haplotype in patients with recently diagnosed type 2 diabetes. *Cardiovasc Diabetol.* 2016;15(1):138. doi:[10.1186/s12933-016-0455-9](https://doi.org/10.1186/s12933-016-0455-9)
168. Qiu Y, Sui X, Cao S, Li X, Ning Y, Wang S, Yin L, Zhi X. Steroidogenic Acute Regulatory Protein (StAR) Overexpression Reduces Inflammation and Insulin Resistance in Obese Mice. *J Cell Biochem.* 2017;118(11):3932-3942. doi:[10.1002/jcb.26046](https://doi.org/10.1002/jcb.26046)
169. Mori J, Alrob OA, Wagg CS, Harris RA, Lopaschuk GD, Oudit GY. ANG II causes insulin resistance and induces cardiac metabolic switch and inefficiency: a critical role of PDK4. *Am J Physiol Heart Circ Physiol.* 2013;304(8):H1103-H1113. doi:[10.1152/ajpheart.00636.2012](https://doi.org/10.1152/ajpheart.00636.2012)
170. Griffin JWD, Liu Y, Bradshaw PC, Wang K. In Silico Preliminary Association of Ammonia Metabolism Genes GLS, CPS1, and GLUL with Risk of Alzheimer's Disease, Major Depressive Disorder, and Type 2 Diabetes. *J Mol Neurosci.* 2018;64(3):385-396. doi:[10.1007/s12031-018-1035-0](https://doi.org/10.1007/s12031-018-1035-0)
171. Sidibeh CO, Pereira MJ, Abalo XM, J Boersma G, Skrtic S, Lundkvist P, Katsogiannos P, Hausch F, Castillejo-López C, Eriksson JW. FKBP5 expression in human adipose tissue: potential role in glucose and lipid metabolism, adipogenesis and type 2 diabetes. *Endocrine.* 2018;62(1):116-128. doi:[10.1007/s12020-018-1674-5](https://doi.org/10.1007/s12020-018-1674-5)
172. Haydar S, Grigorescu F, Vintilă M, Cogne Y, Lautier C, Tutuncu Y, Brun JF, Robine JM, Pugeat M, Normand C, et al. Fine-scale haplotype mapping of MUT, AACS, SLC6A15 and PRKCA genes indicates association with insulin resistance of metabolic syndrome and relationship with branched chain amino acid metabolism or regulation. *PLoS One.* 2019;14(3):e0214122. doi:[10.1371/journal.pone.0214122](https://doi.org/10.1371/journal.pone.0214122)
173. Yang L, Li H, Yu T, Zhao H, Cherian MG, Cai L, Liu Y. Polymorphisms in metallothionein-1 and -2 genes associated with the risk of type 2 diabetes mellitus and its complications. *Am J Physiol Endocrinol Metab.* 2008;294(5):E987-E992. doi:[10.1152/ajpendo.90234.2008](https://doi.org/10.1152/ajpendo.90234.2008)
174. González-Rentería SM, Loera-Castañeda V, Chairez-Hernández I, Sosa-Macias M, Paniagua-Castro N, Lares-Aseff I, Rodríguez-Moran M,



- Guerrero-Romero F, Galaviz-Hernández C. Association of the polymorphisms 292 C>T and 1304 G>A in the SLC38A4 gene with hyperglycaemia. *Diabetes Metab Res Rev.* 2013;29(1):39-43. doi:[10.1002/dmrr.2344](https://doi.org/10.1002/dmrr.2344)
175. Lebeck J, Søndergaard E, Nielsen S. Increased AQP7 abundance in skeletal muscle from obese men with type 2 diabetes. *Am J Physiol Endocrinol Metab.* 2018;315(3):E367-E373. doi:[10.1152/ajpendo.00468.2017](https://doi.org/10.1152/ajpendo.00468.2017)
176. Xia W, Pessentheiner AR, Hofer DC, Amor M, Schreiber R, Schoiswohl G, Eichmann TO, Walenta E, Itariu B, Prager G, et al. Loss of ABHD15 Impairs the Anti-lipolytic Action of Insulin by Altering PDE3B Stability and Contributes to Insulin Resistance. *Cell Rep.* 2018;23(7):1948-1961. doi:[10.1016/j.celrep.2018.04.055](https://doi.org/10.1016/j.celrep.2018.04.055)
177. Ben Aissa M, Lewandowski CT, Ratia KM, Lee SH, Layden BT, LaDu MJ, Thatcher GRJ. Discovery of Nonlipogenic ABCA1 Inducing Compounds with Potential in Alzheimer's Disease and Type 2 Diabetes. *ACS Pharmacol Transl Sci.* 2021;4(1):143-154. doi:[10.1021/acsptsci.0c00149](https://doi.org/10.1021/acsptsci.0c00149)
178. Peng D, Wang J, Zhang R, Jiang F, Tang S, Chen M, Yan J, Sun X, Wang S, Wang T, et al. Common variants in or near ZNRF1, COLEC12, SCYL1BP1 and API5 are associated with diabetic retinopathy in Chinese patients with type 2 diabetes. *Diabetologia.* 2015;58(6):1231-1238. doi:[10.1007/s00125-015-3569-9](https://doi.org/10.1007/s00125-015-3569-9)
179. Manning AK, Goustin AS, Kleinbrink EL, Thepsuwan P, Cai J, Ju D, Leong A, Udler MS, Brown JB, Goodarzi MO, et al. A Long Non-coding RNA, LOC157273, Is an Effector Transcript at the Chromosome 8p23.1-PPP1R3B Metabolic Traits and Type 2 Diabetes Risk Locus. *Front Genet.* 2020;11:615. doi:[10.3389/fgene.2020.00615](https://doi.org/10.3389/fgene.2020.00615)
180. Ganic E, Johansson JK, Bennet H, Fex M, Artner I. Islet-specific monoamine oxidase A and B expression depends on MafA transcriptional activity and is compromised in type 2 diabetes. *Biochem Biophys Res Commun.* 2015;468(4):629-635. doi:[10.1016/j.bbrc.2015.11.002](https://doi.org/10.1016/j.bbrc.2015.11.002)
181. Plengvidhya N, Chanprasert C, Chongjaroen N, Yenchitsomanus PT, Homsanit M, Tangjittipokin W. Impact of KCNQ1, CDKN2A/2B, CDKAL1, HHEX, MTNR1B, SLC30A8, TCF7L2, and UBE2E2 on risk of



- developing type 2 diabetes in Thai population. *BMC Med Genet.* 2018;19(1):93. doi:[10.1186/s12881-018-0614-9](https://doi.org/10.1186/s12881-018-0614-9)
182. Traurig M, Hanson RL, Marinelarena A, Kobes S, Piaggi P, Cole S, Curran JE, Blangero J, Göring H, Kumar S, et al. Analysis of SLC16A11 Variants in 12,811 American Indians: Genotype-Obesity Interaction for Type 2 Diabetes and an Association With RNASEK Expression. *Diabetes.* 2016;65(2):510-519. doi:[10.2337/db15-0571](https://doi.org/10.2337/db15-0571)
183. Lewis JP, Palmer ND, Ellington JB, Divers J, Ng MC, Lu L, Langefeld CD, Freedman BI, Bowden DW. Analysis of candidate genes on chromosome 20q12-13.1 reveals evidence for BMI mediated association of PREX1 with type 2 diabetes in European Americans. *Genomics.* 2010;96(4):211-219. doi:[10.1016/j.ygeno.2010.07.006](https://doi.org/10.1016/j.ygeno.2010.07.006)
184. Mannerås-Holm L, Kirchner H, Björnholm M, Chibalin AV, Zierath JR. mRNA expression of diacylglycerol kinase isoforms in insulin-sensitive tissues: effects of obesity and insulin resistance. *Physiol Rep.* 2015;3(4):e12372. doi:[10.14814/phy2.12372](https://doi.org/10.14814/phy2.12372)
185. Luo Y, Qu H, Wang H, Wei H, Wu J, Duan Y, Liu D, Deng H. Plasma Periostin Levels Are Increased in Chinese Subjects with Obesity and Type 2 Diabetes and Are Positively Correlated with Glucose and Lipid Parameters. *Mediators Inflamm.* 2016;2016:6423637. doi:[10.1155/2016/6423637](https://doi.org/10.1155/2016/6423637)
186. Arellano Perez Vertti RD, Aguilar Muñoz LS, Morán Martínez J, González Galarza FF, Arguello Astorga R. Cartilage Oligomeric Matrix Protein Levels in Type 2 Diabetes Associated with Primary Knee Osteoarthritis Patients. *Genet Test Mol Biomarkers.* 2019;23(1):16-22. doi:[10.1089/gtmb.2018.0184](https://doi.org/10.1089/gtmb.2018.0184)
187. Bursova S, Dubovy P, Vlckova-Moravcova E, Nemeč M, Klusakova I, Belobradkova J, Bednarik J. Expression of growth-associated protein 43 in the skin nerve fibers of patients with type 2 diabetes mellitus. *J Neurol Sci.* 2012;315(1-2):60-63. doi:[10.1016/j.jns.2011.11.038](https://doi.org/10.1016/j.jns.2011.11.038)
188. Fejes Z, Póliska S, Czimmerer Z, Káplár M, Penyige A, Gál Szabó G, Beke Debreceni I, Kunapuli SP, Kappelmayer J, Nagy B Jr. Hyperglycaemia suppresses microRNA expression in platelets to increase P2RY12 and SELP levels in type 2 diabetes mellitus. *Thromb Haemost.* 2017;117(3):529-542. doi:[10.1160/TH16-04-0322](https://doi.org/10.1160/TH16-04-0322)

189. Stavarachi M, Panduru NM, Serafinceanu C, Moța E, Moța M, Cimponeriu D, Ion DA. Investigation of P213S SELL gene polymorphism in type 2 diabetes mellitus and related end stage renal disease. A case-control study. *Rom J Morphol Embryol*. 2011;52(3 Suppl):995-998.
190. Yang CH, Mangiafico SP, Waibel M, Loudovaris T, Loh K, Thomas HE, Morahan G, Andrikopoulos S. E2f8 and Dlg2 genes have independent effects on impaired insulin secretion associated with hyperglycaemia. *Diabetologia*. 2020;63(7):1333-1348. doi:[10.1007/s00125-020-05137-0](https://doi.org/10.1007/s00125-020-05137-0)
191. Lee IS, Lee JH, Kim HJ, Lee JM, Lee SK, Kim HS, Lee JM, Park KS, Ku BJ. Novel ERBB receptor feedback inhibitor 1 (ERRFI1) + 808 T/G polymorphism confers protective effect on diabetic nephropathy in a Korean population. *Dis Markers*. 2013;34(2):113-124. doi:[10.3233/DMA-120949](https://doi.org/10.3233/DMA-120949)
192. Roumeliotis AK, Roumeliotis SK, Panagoutsos SA, Tsetsos F, Georgitsi M, Manolopoulos V, Paschou P, Passadakis PS. Association of ALOX12 gene polymorphism with all-cause and cardiovascular mortality in diabetic nephropathy. *Int Urol Nephrol*. 2018;50(2):321-329. doi:[10.1007/s11255-017-1755-z](https://doi.org/10.1007/s11255-017-1755-z)
193. Tsai YC, Kuo PL, Hung WW, Wu LY, Wu PH, Chang WA, Kuo MC, Hsu YL. Angpt2 Induces Mesangial Cell Apoptosis through the MicroRNA-33-5p-SOCS5 Loop in Diabetic Nephropathy. *Mol Ther Nucleic Acids*. 2018;13:543-555. doi:[10.1016/j.omtn.2018.10.003](https://doi.org/10.1016/j.omtn.2018.10.003)
194. Wang H, Wang J, Qu H, Wei H, Ji B, Yang Z, Wu J, He Q, Luo Y, Liu D, et al. In vitro and in vivo inhibition of mTOR by 1,25-dihydroxyvitamin D3 to improve early diabetic nephropathy via the DDIT4/TSC2/mTOR pathway. *Endocrine*. 2016;54(2):348-359. doi:[10.1007/s12020-016-0999-1](https://doi.org/10.1007/s12020-016-0999-1)
195. Denhez B, Rousseau M, Dancosst DA, Lizotte F, Guay A, Auger-Messier M, Côté AM, Geraldès P. Diabetes-Induced DUSP4 Reduction Promotes Podocyte Dysfunction and Progression of Diabetic Nephropathy. *Diabetes*. 2019;68(5):1026-1039. doi:[10.2337/db18-0837](https://doi.org/10.2337/db18-0837)
196. Huang H, Zhang G, Ge Z. lncRNA MALAT1 Promotes Renal Fibrosis in Diabetic Nephropathy by Targeting the miR-2355-3p/IL6ST Axis. *Front Pharmacol*. 2021;12:647650. doi:[10.3389/fphar.2021.647650](https://doi.org/10.3389/fphar.2021.647650)

197. Sheng J, Li H, Dai Q, Lu C, Xu M, Zhang J, Feng J. DUSP1 recuses diabetic nephropathy via repressing JNK-Mff-mitochondrial fission pathways. *J Cell Physiol.* 2019;234(3):3043-3057. doi:[10.1002/jcp.27124](https://doi.org/10.1002/jcp.27124)
198. Doi T, Moriya T, Fujita Y, Minagawa N, Usami M, Sasaki T, Abe H, Kishi S, Murakami T, Ouchi M, et al. Urinary IgG4 and Smad1 Are Specific Biomarkers for Renal Structural and Functional Changes in Early Stages of Diabetic Nephropathy. *Diabetes.* 2018;67(5):986-993. doi:[10.2337/db17-1043](https://doi.org/10.2337/db17-1043)
199. Wang S, Chen X, Wang M, Yao D, Chen T, Yan Q, Lu W. Long Non-Coding RNA CYP4B1-PS1-001 Inhibits Proliferation and Fibrosis in Diabetic Nephropathy by Interacting with Nucleolin. *Cell Physiol Biochem.* 2018;49(6):2174-2187. doi:[10.1159/000493821](https://doi.org/10.1159/000493821)
200. Xu Z, Jia K, Wang H, Gao F, Zhao S, Li F, Hao J. METTL14-regulated PI3K/Akt signaling pathway via PTEN affects HDAC5-mediated epithelial-mesenchymal transition of renal tubular cells in diabetic kidney disease. *Cell Death Dis.* 2021;12(1):32. doi:[10.1038/s41419-020-03312-0](https://doi.org/10.1038/s41419-020-03312-0)
201. Feng S, Gao Y, Yin D, Lv L, Wen Y, Li Z, Wang B, Wu M, Liu B. Identification of Lumican and Fibromodulin as Hub Genes Associated with Accumulation of Extracellular Matrix in Diabetic Nephropathy. *Kidney Blood Press Res.* 2021;1-11. doi:[10.1159/000514013](https://doi.org/10.1159/000514013)
202. Xu ZJ, Shu S, Li ZJ, Liu YM, Zhang RY, Zhang Y. Liuwei Dihuang pill treats diabetic nephropathy in rats by inhibiting of TGF- $\beta$ /SMADS, MAPK, and NF-kB and upregulating expression of cytoglobin in renal tissues. *Medicine (Baltimore).* 2017;96(3):e5879. doi:[10.1097/MD.0000000000005879](https://doi.org/10.1097/MD.0000000000005879)
203. Jiao X, Zhang D, Hong Q, Yan L, Han Q, Shao F, Cai G, Chen X, Zhu H. Netrin-1 works with UNC5B to regulate angiogenesis in diabetic kidney disease. *Front Med.* 2020;14(3):293-304. doi:[10.1007/s11684-019-0715-7](https://doi.org/10.1007/s11684-019-0715-7)
204. Ruiz-Hernández A, Cabrera-Becerra S, Vera-Juárez G, Hong E, Fengyang H, Arauz J, Villafaña S. Diabetic nephropathy produces alterations in the tissue expression profile of the orphan receptors GPR149, GPR153, GPR176, TAAR3, TAAR5 and TAAR9 in Wistar rats. *Nucleosides Nucleotides Nucleic Acids.* 2020;39(8):1150-1161. doi:[10.1080/15257770.2020.1780437](https://doi.org/10.1080/15257770.2020.1780437)

205. Heckmann MB, Reinhardt F, Finke D, Katus HA, Haberkorn U, Leuschner F, Lehmann LH. Relationship Between Cardiac Fibroblast Activation Protein Activity by Positron Emission Tomography and Cardiovascular Disease. *Circ Cardiovasc Imaging*. 2020;13(9):e010628. doi:[10.1161/CIRCIMAGING.120.010628](https://doi.org/10.1161/CIRCIMAGING.120.010628)
206. Williams T, Hundertmark M, Nordbeck P, Voll S, Arias-Loza PA, Oppelt D, Mühlfelder M, Schraut S, Elsner I, Czolbe M, et al. Eya4 Induces Hypertrophy via Regulation of p27kip1. *Circ Cardiovasc Genet*. 2015;8(6):752-764. doi:[10.1161/CIRCGENETICS.115.001134](https://doi.org/10.1161/CIRCGENETICS.115.001134)
207. Cantù C, Felker A, Zimmerli D, Prummel KD, Cabello EM, Chiavacci E, Méndez-Acevedo KM, Kirchgeorg L, Burger S, Ripoll J, et al. Mutations in Bcl9 and Pygo genes cause congenital heart defects by tissue-specific perturbation of Wnt/ $\beta$ -catenin signaling. *Genes Dev*. 2018;32(21-22):1443-1458. doi:[10.1101/gad.315531.118](https://doi.org/10.1101/gad.315531.118)
208. Chen HH, Keyhanian K, Zhou X, Vilmundarson RO, Almontashiri NA, Cruz SA, Pandey NR, Lerma Yap N, Ho T, Stewart CA, et al. IRF2BP2 Reduces Macrophage Inflammation and Susceptibility to Atherosclerosis. *Circ Res*. 2015;117(8):671-683. doi:[10.1161/CIRCRESAHA.114.305777](https://doi.org/10.1161/CIRCRESAHA.114.305777)
209. Li X, Ma YT, Xie X, Yang YN, Ma X, Zheng YY, Pan S, Liu F, Chen BD. Association of Egr3 genetic polymorphisms and coronary artery disease in the Uygur and Han of China. *Lipids Health Dis*. 2014;13:84. doi:[10.1186/1476-511X-13-84](https://doi.org/10.1186/1476-511X-13-84)
210. Wang J, Wang H, Chen J, Wang X, Sun K, Wang Y, Wang J, Yang X, Song X, Xin Y, et al. GADD45B inhibits MKK7-induced cardiac hypertrophy and the polymorphisms of GADD45B is associated with inter-ventricular septum hypertrophy. *Biochem Biophys Res Commun*. 2008;372(4):623-628. doi:[10.1016/j.bbrc.2008.05.122](https://doi.org/10.1016/j.bbrc.2008.05.122)
211. Rodriguez-Gonzalez M, Lubian-Gutierrez M, Cascales-Poyatos HM, Perez-Reviriego AA, Castellano-Martinez A. Role of the Renin-Angiotensin-Aldosterone System in Dystrophin-Deficient Cardiomyopathy. *Int J Mol Sci*. 2020;22(1):356. doi:[10.3390/ijms22010356](https://doi.org/10.3390/ijms22010356)
212. Yen FT, Roitel O, Bonnard L, Notet V, Pratte D, Stenger C, Magueur E, Bihain BE. Lipolysis stimulated lipoprotein receptor: a novel molecular link between hyperlipidemia, weight gain, and atherosclerosis in mice. *J Biol Chem*. 2008;283(37):25650-25659. doi:[10.1074/jbc.M801027200](https://doi.org/10.1074/jbc.M801027200)

213. Nakano T, Katsuki S, Chen M, Decano JL, Halu A, Lee LH, Pestana DVS, Kum AST, Kuromoto RK, Golden WS, et al. Uremic Toxin Indoxyl Sulfate Promotes Proinflammatory Macrophage Activation Via the Interplay of OATP2B1 and Dll4-Notch Signaling. *Circulation*. 2019;139(1):78-96. doi:[10.1161/CIRCULATIONAHA.118.034588](https://doi.org/10.1161/CIRCULATIONAHA.118.034588)
214. Stewart RM, Rodriguez EC, King MC. Ablation of SUN2-containing LINC complexes drives cardiac hypertrophy without interstitial fibrosis. *Mol Biol Cell*. 2019;30(14):1664-1675. doi:[10.1091/mbc.E18-07-0438](https://doi.org/10.1091/mbc.E18-07-0438)
215. Cowan JR, Salyer L, Wright NT, Kinnamon DD, Amaya P, Jordan E, Bamshad MJ, Nickerson DA, Hershberger RE. SOS1 Gain-of-Function Variants in Dilated Cardiomyopathy. *Circ Genom Precis Med*. 2020;13(4):e002892. doi:[10.1161/CIRCGEN.119.002892](https://doi.org/10.1161/CIRCGEN.119.002892)
216. Yang X, Li X, Lin Q, Xu Q. Up-regulation of microRNA-203 inhibits myocardial fibrosis and oxidative stress in mice with diabetic cardiomyopathy through the inhibition of PI3K/Akt signaling pathway via PIK3CA. *Gene*. 2019;715:143995. doi:[10.1016/j.gene.2019.143995](https://doi.org/10.1016/j.gene.2019.143995)
217. Schmidt A, Marescau B, Boehm EA, Renema WK, Peco R, Das A, Steinfeld R, Chan S, Wallis J, Davidoff M, et al. Severely altered guanidino compound levels, disturbed body weight homeostasis and impaired fertility in a mouse model of guanidinoacetate N-methyltransferase (GAMT) deficiency. *Hum Mol Genet*. 2004;13(9):905-921. doi:[10.1093/hmg/ddh112](https://doi.org/10.1093/hmg/ddh112)
218. Liu C, Zhang H, Chen Y, Wang S, Chen Z, Liu Z, Wang J. Identifying RBM47, HCK, CD53, TYROBP, and HAVCR2 as Hub Genes in Advanced Atherosclerotic Plaques by Network-Based Analysis and Validation. *Front Genet*. 2021;11:602908. doi:[10.3389/fgene.2020.602908](https://doi.org/10.3389/fgene.2020.602908)
219. Zhu WS, Guo W, Zhu JN, Tang CM, Fu YH, Lin QX, Tan N, Shan ZX. Hsp90aa1: a novel target gene of miR-1 in cardiac ischemia/reperfusion injury. *Sci Rep*. 2016;6:24498. doi:[10.1038/srep24498](https://doi.org/10.1038/srep24498)
220. Qian X, Wang H, Wang Y, Chen J, Guo X, Deng H. Enhanced Autophagy in GAB1-Deficient Vascular Endothelial Cells Is Responsible for Atherosclerosis Progression. *Front Physiol*. 2021;11:559396. doi:[10.3389/fphys.2020.559396](https://doi.org/10.3389/fphys.2020.559396)
221. Cannavo A, Rengo G, Liccardo D, Pagano G, Zincarelli C, De Angelis MC, Puglia R, Di Pietro E, Rabinowitz JE, Barone MV, et al.  $\beta$ 1-adrenergic receptor and sphingosine-1-phosphate receptor 1 (S1PR1)



- reciprocal downregulation influences cardiac hypertrophic response and progression to heart failure: protective role of S1PR1 cardiac gene therapy. *Circulation*. 2013;128(15):1612-1622. doi:[10.1161/CIRCULATIONAHA.113.002659](https://doi.org/10.1161/CIRCULATIONAHA.113.002659)
222. Stobdan T, Zhou D, Williams AT, Cabrales P, Haddad GG. Cardiac-specific knockout and pharmacological inhibition of Endothelin receptor type B lead to cardiac resistance to extreme hypoxia. *J Mol Med (Berl)*. 2018;96(9):975-982. doi:[10.1007/s00109-018-1673-2](https://doi.org/10.1007/s00109-018-1673-2)
223. Song KY, Zhang XZ, Li F, Ji QR. Silencing of ATP2B1-AS1 contributes to protection against myocardial infarction in mouse via blocking NFKBIA-mediated NF- $\kappa$ B signalling pathway. *J Cell Mol Med*. 2020;24(8):4466-4479. doi:[10.1111/jcmm.15105](https://doi.org/10.1111/jcmm.15105)
224. Yang B, Lin H, Xiao J, Lu Y, Luo X, Li B, Zhang Y, Xu C, Bai Y, Wang H, et al. The muscle-specific microRNA miR-1 regulates cardiac arrhythmogenic potential by targeting GJA1 and KCNJ2 [published correction appears in *Nat Med*. 2011 Dec;17(12):1693]. *Nat Med*. 2007;13(4):486-491. doi:[10.1038/nm1569](https://doi.org/10.1038/nm1569)
225. Wan X, Yao B, Ma Y, Liu Y, Tang Y, Hu J, Li M, Fu S, Zheng X, Yin D. MicroRNA-128-1-5p attenuates myocardial ischemia/reperfusion injury by suppressing Gadd45g-mediated apoptotic signaling. *Biochem Biophys Res Commun*. 2020;530(1):314-321. doi:[10.1016/j.bbrc.2020.07.009](https://doi.org/10.1016/j.bbrc.2020.07.009)
226. Guo Y, Jia P, Chen Y, Yu H, Xin X, Bao Y, Yang H, Wu N, Sun Y, Jia D. PHLDA1 is a new therapeutic target of oxidative stress and ischemia reperfusion-induced myocardial injury. *Life Sci*. 2020;245:117347. doi:[10.1016/j.lfs.2020.117347](https://doi.org/10.1016/j.lfs.2020.117347)
227. Lai JH, Hung LF, Huang CY, Wu DW, Wu CH, Ho LJ. Mitochondrial protein CMPK2 regulates IFN alpha-enhanced foam cell formation, potentially contributing to premature atherosclerosis in SLE. *Arthritis Res Ther*. 2021;23(1):120. doi:[10.1186/s13075-021-02470-6](https://doi.org/10.1186/s13075-021-02470-6)
228. Wang D, Chu M, Wang F, Zhou A, Ruan M, Chen Y. A Genetic Variant in FIGN Gene Reduces the Risk of Congenital Heart Disease in Han Chinese Populations. *Pediatr Cardiol*. 2017;38(6):1169-1174. doi:[10.1007/s00246-017-1636-3](https://doi.org/10.1007/s00246-017-1636-3)



229. Vega AL, Tester DJ, Ackerman MJ, Makielski JC. Protein kinase A-dependent biophysical phenotype for V227F-KCNJ2 mutation in catecholaminergic polymorphic ventricular tachycardia. *Circ Arrhythm Electrophysiol.* 2009;2(5):540-547. doi:[10.1161/CIRCEP.109.872309](https://doi.org/10.1161/CIRCEP.109.872309)
230. Minoretti P, Falcone C, Aldeghi A, Olivieri V, Mori F, Emanuele E, Calcagnino M, Geroldi D. A novel Val734Ile variant in the ABCC9 gene associated with myocardial infarction. *Clin Chim Acta.* 2006;370(1-2):124-128. doi:[10.1016/j.cca.2006.02.007](https://doi.org/10.1016/j.cca.2006.02.007)
231. Zhuo C, Jiang R, Lin X, Shao M. LncRNA H19 inhibits autophagy by epigenetically silencing of DIRAS3 in diabetic cardiomyopathy. *Oncotarget.* 2017;8(1):1429-1437. doi:[10.18632/oncotarget.13637](https://doi.org/10.18632/oncotarget.13637)
232. Edin ML, Hamedani BG, Gruzdev A, Graves JP, Lih FB, Arbes SJ 3rd, Singh R, Orjuela Leon AC, Bradbury JA, DeGraff LM, et al. Epoxide hydrolase 1 (EPHX1) hydrolyzes epoxyeicosanoids and impairs cardiac recovery after ischemia. *J Biol Chem.* 2018;293(9):3281-3292. doi:[10.1074/jbc.RA117.000298](https://doi.org/10.1074/jbc.RA117.000298)
233. Sack MN. Rab4a signaling unmasks a pivotal link between myocardial homeostasis and metabolic remodeling in the diabetic heart. *J Mol Cell Cardiol.* 2010;49(6):908-910. doi:[10.1016/j.yjmcc.2010.09.002](https://doi.org/10.1016/j.yjmcc.2010.09.002)
234. Yan B, Wang J. UBIAD1 expression is associated with cardiac hypertrophy in spontaneously hypertensive rats. *Mol Med Rep.* 2019;19(1):651-659. doi:[10.3892/mmr.2018.9693](https://doi.org/10.3892/mmr.2018.9693)
235. Ng K, Titus EW, Lieve KV, Roston TM, Mazzanti A, Deiter FH, Denjoy I, Ingles J, Till J, Robyns T, et al. An International Multicenter Evaluation of Inheritance Patterns, Arrhythmic Risks, and Underlying Mechanisms of CASQ2-Catecholaminergic Polymorphic Ventricular Tachycardia. *Circulation.* 2020;142(10):932-947. doi:[10.1161/CIRCULATIONAHA.120.045723](https://doi.org/10.1161/CIRCULATIONAHA.120.045723)
236. Linschoten M, Teske AJ, Baas AF, Vink A, Dooijes D, Baars HF, Asselbergs FW. Truncating Titin (TTN) Variants in Chemotherapy-Induced Cardiomyopathy. *J Card Fail.* 2017;23(6):476-479. doi:[10.1016/j.cardfail.2017.03.003](https://doi.org/10.1016/j.cardfail.2017.03.003)
237. Noori MR, Zhang B, Pan L. Is KCNH1 mutation related to coronary artery ectasia. *BMC Cardiovasc Disord.* 2019;19(1):296. doi:[10.1186/s12872-019-01276-4](https://doi.org/10.1186/s12872-019-01276-4)

238. Hu J, Gao C, Wei C, Xue Y, Shao C, Hao Y, Gou LT, Zhou Y, Zhang J, Ren S, et al. RBFox2-miR-34a-Jph2 axis contributes to cardiac decompensation during heart failure. *Proc Natl Acad Sci U S A*. 2019;116(13):6172-6180. doi:[10.1073/pnas.1822176116](https://doi.org/10.1073/pnas.1822176116)
239. Omede A, Zi M, Prehar S, Maqsood A, Stafford N, Mamas M, Cartwright E, Oceandy D. The oxoglutarate receptor 1 (OXGR1) modulates pressure overload-induced cardiac hypertrophy in mice. *Biochem Biophys Res Commun*. 2016;479(4):708-714. doi:[10.1016/j.bbrc.2016.09.147](https://doi.org/10.1016/j.bbrc.2016.09.147)
240. Bi HL, Zhang YL, Yang J, Shu Q, Yang XL, Yan X, Chen C, Li Z, Li HH. Inhibition of UCHL1 by LDN-57444 attenuates Ang II-Induced atrial fibrillation in mice. *Hypertens Res*. 2020;43(3):168-177. doi:[10.1038/s41440-019-0354-z](https://doi.org/10.1038/s41440-019-0354-z)
241. Zhao L, Zheng M, Guo Z, Li K, Liu Y, Chen M, Yang X. Circulating Serpina3 levels predict the major adverse cardiac events in patients with myocardial infarction. *Int J Cardiol*. 2020;300:34-38. doi:[10.1016/j.ijcard.2019.08.034](https://doi.org/10.1016/j.ijcard.2019.08.034)
242. Zhou K, Li Y, Xu Y, Guo R. Circulating Matrix Metalloproteinase-28 Levels Are Related to GRACE Scores and Short-Term Outcomes in Patients with Acute Myocardial Infarction. *Biomed Res Int*. 2020;2020:9206703. doi:[10.1155/2020/9206703](https://doi.org/10.1155/2020/9206703)
243. Wang X, Chen W, Zhang J, Khan A, Li L, Huang F, Qiu Z, Wang L, Chen X. Critical Role of ADAMTS2 (A Disintegrin and Metalloproteinase With Thrombospondin Motifs 2) in Cardiac Hypertrophy Induced by Pressure Overload. *Hypertension*. 2017;69(6):1060-1069. doi:[10.1161/HYPERTENSIONAHA.116.08581](https://doi.org/10.1161/HYPERTENSIONAHA.116.08581)
244. Timur AA, Murugesan G, Zhang L, Aung PP, Barnard J, Wang QK, Gaussem P, Silverstein RL, Bhatt DL, Kottke-Marchant K. P2RY1 and P2RY12 polymorphisms and on-aspirin platelet reactivity in patients with coronary artery disease. *Int J Lab Hematol*. 2012;34(5):473-483. doi:[10.1111/j.1751-553X.2012.01420.x](https://doi.org/10.1111/j.1751-553X.2012.01420.x)
245. Huang R, Cao Y, Li H, Hu Z, Zhang H, Zhang L, Su W, Xu Y, Liang L, Melgiri ND, et al. miR-532-3p-CSF2RA Axis as a Key Regulator of Vulnerable Atherosclerotic Plaque Formation. *Can J Cardiol*. 2020;36(11):1782-1794. doi:[10.1016/j.cjca.2019.12.018](https://doi.org/10.1016/j.cjca.2019.12.018)

246. Mo XG, Liu W, Yang Y, Imani S, Lu S, Dan G, Nie X, Yan J, Zhan R, Li X, et al. NCF2, MYO1F, S1PR4, and FCN1 as potential noninvasive diagnostic biomarkers in patients with obstructive coronary artery: A weighted gene co-expression network analysis. *J Cell Biochem.* 2019;120(10):18219-18235. doi:[10.1002/jcb.29128](https://doi.org/10.1002/jcb.29128)
247. Tregouet DA, Barboux S, Poirier O, Blankenberg S, Bickel C, Escolano S, Rupprecht HJ, Meyer J, Cambien F, Tiret L. SELPLG gene polymorphisms in relation to plasma SELPLG levels and coronary artery disease. *Ann Hum Genet.* 2003;67(Pt 6):504-511. doi:[10.1046/j.1529-8817.2003.00053.x](https://doi.org/10.1046/j.1529-8817.2003.00053.x)
248. Li W, Xin B, Yan J, Wu Y, Hu B, Liu L, Wang Y, Ahn J, Skowronski J, Zhang Z, et al. SAMHD1 Gene Mutations Are Associated with Cerebral Large-Artery Atherosclerosis. *Biomed Res Int.* 2015;2015:739586. doi:[10.1155/2015/739586](https://doi.org/10.1155/2015/739586)
249. Guicheney P, Soliman H, Launay JM, Dreux C, Meyer P. Circulating monoamine oxidase B and phenolsulfotransferase activities in essential hypertensive patients. *Clin Exp Hypertens A.* 1988;10(4):533-544. doi:[10.3109/10641968809033907](https://doi.org/10.3109/10641968809033907)
250. Selvarajah V, Mäki-Petäjä KM, Pedro L, Bruggraber SFA, Burling K, Goodhart AK, Brown MJ, McEniery CM, Wilkinson IB. Novel Mechanism for Buffering Dietary Salt in Humans: Effects of Salt Loading on Skin Sodium, Vascular Endothelial Growth Factor C, and Blood Pressure. *Hypertension.* 2017;70(5):930-937. doi:[10.1161/HYPERTENSIONAHA.117.10003](https://doi.org/10.1161/HYPERTENSIONAHA.117.10003)
251. Zhao Q, Sun H, Yin L, Wang L. miR-126a-5p-Dbp and miR-31a-Crot/Mrp14 interaction pairs crucial for the development of hypertension and stroke. *Mol Med Rep.* 2019;20(5):4151-4167. doi:[10.3892/mmr.2019.10679](https://doi.org/10.3892/mmr.2019.10679)
252. Sun L, Lin P, Chen Y, Yu H, Ren S, Wang J, Zhao L, Du G. miR-182-3p/Myadm contribute to pulmonary artery hypertension vascular remodeling via a KLF4/p21-dependent mechanism. *Theranostics.* 2020;10(12):5581-5599. doi:[10.7150/thno.44687](https://doi.org/10.7150/thno.44687)
253. Zhou JJ, Li H, Qian YL, Quan RL, Chen XX, Li L, Li Y, Wang PH, Meng XM, Jing XL, et al. Nestin represents a potential marker of pulmonary vascular remodeling in pulmonary arterial hypertension associated with

- congenital heart disease. *J Mol Cell Cardiol.* 2020;149:41-53. doi:[10.1016/j.yjmcc.2020.09.005](https://doi.org/10.1016/j.yjmcc.2020.09.005)
254. Baptista R, Marques C, Catarino S, Enguita FJ, Costa MC, Matafome P, Zuzarte M, Castro G, Reis A, Monteiro P, et al. MicroRNA-424(322) as a new marker of disease progression in pulmonary arterial hypertension and its role in right ventricular hypertrophy by targeting SMURF1. *Cardiovasc Res.* 2018;114(1):53-64. doi:[10.1093/cvr/cvx187](https://doi.org/10.1093/cvr/cvx187)
255. Zicha J, Dobešová Z, Zídek V, Silhavý J, Simáková M, Mlejnek P, Vaněčková I, Kuneš J, Pravenec M. Pharmacogenetic analysis of captopril effects on blood pressure: possible role of the Ednrb (endothelin receptor type B) candidate gene. *Physiol Res.* 2014;63(2):263-265. doi:[10.33549/physiolres.932732](https://doi.org/10.33549/physiolres.932732)
256. Zou L, Li W, Han J, Yang Y, Jin J, Xiao F, Xu X, Zhai Z. Identification of a low frequency missense mutation in MUC6 contributing to pulmonary artery hypertension by whole-exome sequencing. *Pulm Circ.* 2018;8(3):2045894018794374. doi:[10.1177/2045894018794374](https://doi.org/10.1177/2045894018794374)
257. Sun S, Zhang F, Pan Y, Xu Y, Chen A, Wang J, Tang H, Han Y. A TOR2A Gene Product: Salusin- $\beta$  Contributes to Attenuated Vasodilatation of Spontaneously Hypertensive Rats. *Cardiovasc Drugs Ther.* 2021;35(1):125-139. doi:[10.1007/s10557-020-06983-1](https://doi.org/10.1007/s10557-020-06983-1)
258. Eaaswarkhanth M, Dos Santos ALC, Gokcumen O, Al-Mulla F, Thanaraj TA. Genome-Wide Selection Scan in an Arabian Peninsula Population Identifies a TNKS Haplotype Linked to Metabolic Traits and Hypertension. *Genome Biol Evol.* 2020;12(3):77-87. doi:[10.1093/gbe/evaa033](https://doi.org/10.1093/gbe/evaa033)
259. Wang J, Yang K, Yuan JX. NEDD9, a Hypoxia-upregulated Mediator for Pathogenic Platelet-endothelial Cell Interaction in Pulmonary Hypertension. *Am J Respir Crit Care Med.* 2021;10.1164/rccm.202101-0007ED. doi:[10.1164/rccm.202101-0007ED](https://doi.org/10.1164/rccm.202101-0007ED)
260. Nitta CH, Osmond DA, Herbert LM, Beasley BF, Resta TC, Walker BR, Jernigan NL. Role of ASIC1 in the development of chronic hypoxia-induced pulmonary hypertension. *Am J Physiol Heart Circ Physiol.* 2014;306(1):H41-H52. doi:[10.1152/ajpheart.00269.2013](https://doi.org/10.1152/ajpheart.00269.2013)
261. Omura J, Satoh K, Kikuchi N, Satoh T, Kurosawa R, Nogi M, Ohtsuki T, Al-Mamun ME, Siddique MAH, Yaoita N, et al. ADAMTS8 Promotes

- the Development of Pulmonary Arterial Hypertension and Right Ventricular Failure: A Possible Novel Therapeutic Target. *Circ Res.* 2019;125(10):884-906. doi:[10.1161/CIRCRESAHA.119.315398](https://doi.org/10.1161/CIRCRESAHA.119.315398)
262. White Z, Milad N, Tehrani AY, Chen WW, Donen G, Sellers SL, Bernatchez P. Angiotensin II receptor blocker losartan exacerbates muscle damage and exhibits weak blood pressure-lowering activity in a dysferlin-null model of Limb-Girdle muscular dystrophy type 2B. *PLoS One.* 2019;14(8):e0220903. doi:[10.1371/journal.pone.0220903](https://doi.org/10.1371/journal.pone.0220903)
263. Amlal H, Xu J, Barone S, Zahedi K, Soleimani M. The chloride channel/transporter Slc26a9 regulates the systemic arterial pressure and renal chloride excretion. *J Mol Med (Berl).* 2013;91(5):561-572. doi:[10.1007/s00109-012-0973-1](https://doi.org/10.1007/s00109-012-0973-1)
264. Le Ribeuz H, Courboulin A, Ghigna MR, Lambert M, Hautefort A, Humbert M, Montani D, Cohen-Kaminsky S, Perros F, Antigny F. In vivo miR-138-5p inhibition alleviates monocrotaline-induced pulmonary hypertension and normalizes pulmonary KCNK3 and SLC45A3 expression. *Respir Res.* 2020;21(1):186. doi:[10.1186/s12931-020-01444-7](https://doi.org/10.1186/s12931-020-01444-7)
265. Berg T. M-currents (Kv7.2-7.3/KCNQ2-KCNQ3) Are Responsible for Dysfunctional Autonomic Control in Hypertensive Rats. *Front Physiol.* 2016;7:584. doi:[10.3389/fphys.2016.00584](https://doi.org/10.3389/fphys.2016.00584)
266. Yang S, He H, Ma QS, Zhang Y, Zhu Y, Wan X, Wang FW, Wang SS, Liu L, Li B. Experimental study of the protective effects of SYVN1 against diabetic retinopathy. *Sci Rep.* 2015;5:14036. doi:[10.1038/srep14036](https://doi.org/10.1038/srep14036)
267. Zhang ZZ, Qin XH, Zhang J. MicroRNA-183 inhibition exerts suppressive effects on diabetic retinopathy by inactivating BTG1-mediated PI3K/Akt/VEGF signaling pathway. *Am J Physiol Endocrinol Metab.* 2019;316(6):E1050-E1060. doi:[10.1152/ajpendo.00444.2018](https://doi.org/10.1152/ajpendo.00444.2018)
268. Wang J, Yang MM, Li YB, Liu GD, Teng Y, Liu XM. Association of CFH and CFB gene polymorphisms with retinopathy in type 2 diabetic patients. *Mediators Inflamm.* 2013;2013:748435. doi:[10.1155/2013/748435](https://doi.org/10.1155/2013/748435)
269. Chen Y, Ye C, Chen J, Lin D, Wang H, Wang S. Association of the gene polymorphisms of BMPR2, ACVRL1, SMAD9 and their interactions with the risk of essential hypertension in the Chinese Han population. *Biosci Rep.* 2019;39(1):BSR20181217. doi:[10.1042/BSR20181217](https://doi.org/10.1042/BSR20181217)



270. Gregg T, Sdao SM, Dhillon RS, Rensvold JW, Lewandowski SL, Pagliarini DJ, Denu JM, Merrins MJ. Obesity-dependent CDK1 signaling stimulates mitochondrial respiration at complex I in pancreatic  $\beta$ -cells. *J Biol Chem*. 2019;294(12):4656-4666. doi:[10.1074/jbc.RA118.006085](https://doi.org/10.1074/jbc.RA118.006085)
271. Karere GM, Cox LA, Bishop AC, South AM, Shaltout HA, Mercado-Deane MG, Cuda S. Sex Differences in MicroRNA Expression and Cardiometabolic Risk Factors in Hispanic Adolescents with Obesity. *J Pediatr*. 2021;S0022-3476(21)00319-X. doi:[10.1016/j.jpeds.2021.03.070](https://doi.org/10.1016/j.jpeds.2021.03.070)
272. Costantino S, Akhmedov A, Melina G, Mohammed SA, Othman A, Ambrosini S, Wijnen WJ, Sada L, Ciavarella GM, Liberale L, et al. Obesity-induced activation of JunD promotes myocardial lipid accumulation and metabolic cardiomyopathy. *Eur Heart J*. 2019;40(12):997-1008. doi:[10.1093/eurheartj/ehy903](https://doi.org/10.1093/eurheartj/ehy903)
273. Westergren R, Nilsson D, Heglind M, Arani Z, Grände M, Cederberg A, Ahrén B, Enerbäck S. Overexpression of Foxf2 in adipose tissue is associated with lower levels of IRS1 and decreased glucose uptake in vivo. *Am J Physiol Endocrinol Metab*. 2010;298(3):E548-E554. doi:[10.1152/ajpendo.00395.2009](https://doi.org/10.1152/ajpendo.00395.2009)
274. Catanzaro G, Besharat ZM, Chiacchiarini M, Abballe L, Sabato C, Vacca A, Borgiani P, Dotta F, Tesauro M, Po A, et al. Circulating MicroRNAs in Elderly Type 2 Diabetic Patients. *Int J Endocrinol*. 2018;2018:6872635. doi:[10.1155/2018/6872635](https://doi.org/10.1155/2018/6872635)
275. Demirsoy İH, Ertural DY, Balci Ş, Çinkır Ü, Sezer K, Tamer L, Aras N. Profiles of Circulating MiRNAs Following Metformin Treatment in Patients with Type 2 Diabetes. *J Med Biochem*. 2018;37(4):499-506. doi:[10.2478/jomb-2018-0009](https://doi.org/10.2478/jomb-2018-0009)
276. Li L, Bai Y, Du R, Tang L, Li L. The role of Smad4 in the regulation of insulin resistance, inflammation and cell proliferation in HTR8-Svneo cells. *Cell Biochem Funct*. 2021;39(1):126-138. doi:[10.1002/cbf.3594](https://doi.org/10.1002/cbf.3594)
277. Wang N, Zhang D, Mao X, Zou F, Jin H, Ouyang J. Astragalus polysaccharides decreased the expression of PTP1B through relieving ER stress induced activation of ATF6 in a rat model of type 2 diabetes. *Mol Cell Endocrinol*. 2009;307(1-2):89-98. doi:[10.1016/j.mce.2009.03.001](https://doi.org/10.1016/j.mce.2009.03.001)
278. Onrat ST, Onrat E, Ercan Onay E, Yalım Z, Avşar A. The Genetic Determination of the Differentiation Between Ischemic Dilated



- Cardiomyopathy and Idiopathic Dilated Cardiomyopathy. *Genet Test Mol Biomarkers*. 2018;22(11):644-651. doi:[10.1089/gtmb.2018.0188](https://doi.org/10.1089/gtmb.2018.0188)
279. Huang CY, Kuo CH, Pai PY, Ho TJ, Lin YM, Chen RJ, Tsai FJ, Vijaya Padma V, Kuo WW, Huang CY. Inhibition of HSF2 SUMOylation via MEL18 upregulates IGF-IIR and leads to hypertension-induced cardiac hypertrophy. *Int J Cardiol*. 2018;257:283-290. doi:[10.1016/j.ijcard.2017.10.102](https://doi.org/10.1016/j.ijcard.2017.10.102)
280. Mendes-Silva AP, Pereira KS, Tolentino-Araujo GT, Nicolau Ede S, Silva-Ferreira CM, Teixeira AL, Diniz BS. Shared Biologic Pathways Between Alzheimer Disease and Major Depression: A Systematic Review of MicroRNA Expression Studies. *Am J Geriatr Psychiatry*. 2016;24(10):903-912. doi:[10.1016/j.jagp.2016.07.017](https://doi.org/10.1016/j.jagp.2016.07.017)
281. Sakurai A, Ono H, Ochi A, Matsuura M, Yoshimoto S, Kishi S, Murakami T, Tominaga T, Nagai K, Abe H, et al. Involvement of Elf3 on Smad3 activation-dependent injuries in podocytes and excretion of urinary exosome in diabetic nephropathy. *PLoS One*. 2019;14(5):e0216788. doi:[10.1371/journal.pone.0216788](https://doi.org/10.1371/journal.pone.0216788)
282. Yan L, Cogan JD, Hedges LK, Nunley B, Hamid R, Austin ED. The Y Chromosome Regulates BMPR2 Expression via SRY: A Possible Reason "Why" Fewer Males Develop Pulmonary Arterial Hypertension. *Am J Respir Crit Care Med*. 2018;198(12):1581-1583. doi:[10.1164/rccm.201802-0308LE](https://doi.org/10.1164/rccm.201802-0308LE)

## Tables

**Table 1** The sequences of primers for quantitative RT-PCR

| Genes    | Forward Primers      | Reverse Primers        |
|----------|----------------------|------------------------|
| MYC      | CTGTACCTCGTCCGATTCC  | GCTCTTCTTCAGAGTCGCT    |
| EGFR     | TGGAGCTATGGTGTCACTG  | TGAGATGTCACTTGCTGGG    |
| LNX1     | CTGTACTCGGAACTGGCTC  | TGGCCATTAGTGTCCAGTC    |
| YBX1     | AAGAAGGTCATCGCAACGA  | CAAATACGTCTTCCTTGGTGTC |
| HSP90AA1 | CAATTCATCGGACGCTCTG  | AGATTGATGTGCAGCTCCT    |
| ESR1     | CCTCTGGCTACCATTATGGG | AGTCATTGTGTCCTTGAATGC  |
| FN1      | TACCAAGGCTGGATGATGG  | TGCATCTGTTTCTGGAGGT    |
| TK1      | AGATTCAGGTGATTCTCGGG | ACTTGTA CTGGGCGATCTG   |
| ANLN     | TCCGACCACAAAGAGAAGAC | AGAGCCAGTTCTTGGTGAC    |
| SMAD9    | CACATTGGAAAGGGTGTGC  | GACAAAGATGCTGCTGTGC    |

**Table 2** The statistical metrics for key differentially expressed genes (DEGs)

| Gene Symbol | logFC    | pValue   | adj.P.Val | tvalue   | Regulation | Gene Name                                          |
|-------------|----------|----------|-----------|----------|------------|----------------------------------------------------|
| CRNN        | 5.712946 | 1.99E-09 | 6.00E-07  | 5.998709 | Up         | cornulin                                           |
| PGA5        | 4.614794 | 6.37E-06 | 0.000351  | 4.513665 | Up         | pepsinogen A5                                      |
| PGA4        | 4.56097  | 6.52E-06 | 0.000356  | 4.508769 | Up         | pepsinogen A4                                      |
| PGA3        | 4.488203 | 2.38E-06 | 0.00017   | 4.718    | Up         | pepsinogen A3                                      |
| CGA         | 4.197712 | 1.53E-05 | 0.000659  | 4.324569 | Up         | glycoprotein hormones, alpha polypeptide           |
| FGA         | 4.148471 | 0.000107 | 0.002674  | 3.873135 | Up         | fibrinogen alpha chain                             |
| IGF2        | 3.675622 | 1.58E-06 | 0.000129  | 4.800531 | Up         | insulin like growth factor 2                       |
| KRT6A       | 3.542048 | 3.39E-06 | 0.000219  | 4.645643 | Up         | keratin 6A                                         |
| FGB         | 3.450811 | 0.00024  | 0.004787  | 3.6727   | Up         | fibrinogen beta chain                              |
| LCE3D       | 3.269781 | 4.62E-09 | 1.14E-06  | 5.860339 | Up         | late cornified envelope 3D                         |
| PRR9        | 3.141513 | 2.53E-08 | 4.72E-06  | 5.571309 | Up         | proline rich 9                                     |
| SLC6A15     | 3.082853 | 0.004861 | 0.038891  | 2.816137 | Up         | solute carrier family 6 member 15                  |
| APOA5       | 3.070951 | 6.13E-06 | 0.000342  | 4.521718 | Up         | apolipoprotein A5                                  |
| SPRR3       | 2.937684 | 1.25E-05 | 0.000573  | 4.368603 | Up         | small proline rich protein 3                       |
| FLG         | 2.932836 | 0.000863 | 0.01179   | 3.331797 | Up         | filaggrin                                          |
| SPRR2D      | 2.867184 | 0.000152 | 0.003454  | 3.787481 | Up         | small proline rich protein 2D                      |
| SPRR1B      | 2.866557 | 2.47E-05 | 0.000915  | 4.217563 | Up         | small proline rich protein 1B                      |
| SLITRK6     | 2.858672 | 3.81E-05 | 0.001252  | 4.118929 | Up         | SLIT and NTRK like family member 6                 |
| CT62        | 2.82068  | 0.000229 | 0.004614  | 3.684932 | Up         | cancer/testis associated 62                        |
| FGF21       | 2.789926 | 3.91E-06 | 0.000244  | 4.615907 | Up         | fibroblast growth factor 21                        |
| FGG         | 2.773228 | 0.001178 | 0.01471   | 3.244101 | Up         | fibrinogen gamma chain                             |
| TBX22       | 2.752029 | 5.13E-05 | 0.001556  | 4.049842 | Up         | T-box transcription factor 22                      |
| CALCR       | 2.747775 | 0.000411 | 0.006924  | 3.533141 | Up         | calcitonin receptor                                |
| PGC         | 2.688901 | 2.74E-05 | 0.000994  | 4.194452 | Up         | progastricin                                       |
| SPRR1A      | 2.664413 | 0.000477 | 0.007678  | 3.493077 | Up         | small proline rich protein 1A                      |
| ABCB11      | 2.650492 | 0.004481 | 0.036813  | 2.842169 | Up         | ATP binding cassette subfamily B member 11         |
| USH2A       | 2.631238 | 0.002995 | 0.027872  | 2.968252 | Up         | usherin                                            |
| OTX2        | 2.568693 | 6.44E-06 | 0.000354  | 4.511363 | Up         | orthodenticle/homeobox 2                           |
| HBM         | 2.562338 | 0.002326 | 0.023468  | 3.045118 | Up         | hemoglobin subunit mu                              |
| DCC         | 2.561422 | 0.000102 | 0.002565  | 3.885894 | Up         | DCC netrin 1 receptor                              |
| POTED       | 2.474492 | 0.002454 | 0.024342  | 3.028922 | Up         | POTE ankyrin domain family member D                |
| MUC21       | 2.456424 | 0.005692 | 0.043083  | 2.765033 | Up         | mucin 21, cell surface associated                  |
| KCP         | 2.393659 | 0.001362 | 0.016053  | 3.202565 | Up         | kielin cysteine rich BMP regulator                 |
| RGPD3       | 2.363618 | 0.003817 | 0.032868  | 2.892895 | Up         | RANBP2 like and GRIP domain containing 3           |
| NOG         | 2.354832 | 0.000792 | 0.01105   | 3.355497 | Up         | noggin                                             |
| STAR        | 2.354313 | 0.000103 | 0.002597  | 3.882572 | Up         | steroidogenic acute regulatory protein             |
| KRT16       | 2.299283 | 0.004488 | 0.036852  | 2.841684 | Up         | keratin 16                                         |
| HSFX2       | 2.284692 | 0.000834 | 0.01146   | 3.341177 | Up         | heat shock transcription factor family, X-linked 2 |

|            |          |          |          |          |    |                                                                    |
|------------|----------|----------|----------|----------|----|--------------------------------------------------------------------|
| IL1RN      | 2.270537 | 0.001478 | 0.017037 | 3.179045 | Up | interleukin 1 receptor antagonist                                  |
| ZSCAN10    | 2.266233 | 0.000319 | 0.005811 | 3.599153 | Up | zinc finger and SCAN domain containing 10                          |
| MAGEA2     | 2.264446 | 0.000456 | 0.007479 | 3.505373 | Up | MAGE family member A2                                              |
| SHISA2     | 2.254679 | 2.83E-05 | 0.001022 | 4.186632 | Up | shisa family member 2                                              |
| TACR1      | 2.231669 | 0.001599 | 0.017899 | 3.156123 | Up | tachykinin receptor 1                                              |
| AQP5       | 2.195113 | 0.00015  | 0.003428 | 3.791855 | Up | aquaporin 5                                                        |
| PRRG3      | 2.180564 | 0.005567 | 0.042512 | 2.77226  | Up | proline rich and Gla domain 3                                      |
| SYNDIG1    | 2.170655 | 0.002504 | 0.024649 | 3.022825 | Up | synapse differentiation inducing 1                                 |
| TFAP2C     | 2.160589 | 0.000396 | 0.006739 | 3.542676 | Up | transcription factor AP-2 gamma                                    |
| ERRFI1     | 2.155407 | 3.75E-08 | 6.56E-06 | 5.5022   | Up | ERBB receptor feedback inhibitor 1                                 |
| TMEM174    | 2.090104 | 7.82E-05 | 0.002098 | 3.949874 | Up | transmembrane protein 174                                          |
| CNTNAP4    | 2.08132  | 0.001501 | 0.017188 | 3.174485 | Up | contactin associated protein family member 4                       |
| PLP1       | 2.069097 | 0.001613 | 0.017994 | 3.153457 | Up | proteolipid protein 1                                              |
| RUNX1T1    | 2.059542 | 8.51E-05 | 0.002242 | 3.929478 | Up | RUNX1 partner transcriptional co-repressor 1                       |
| ALOX12     | 2.044757 | 0.007045 | 0.049709 | 2.694705 | Up | arachidonate 12-lipoxygenase, 12S type                             |
| KRT13      | 2.038413 | 0.002945 | 0.027488 | 2.973453 | Up | keratin 13                                                         |
| SLC7A14    | 1.98194  | 0.006299 | 0.0461   | 2.731787 | Up | solute carrier family 7 member 14                                  |
| SPRR2E     | 1.941341 | 0.006326 | 0.046256 | 2.730406 | Up | small proline rich protein 2E                                      |
| PK4        | 1.930909 | 2.91E-10 | 1.25E-07 | 6.303686 | Up | pyruvate dehydrogenase kinase 4                                    |
| TENM1      | 1.914484 | 0.006644 | 0.047813 | 2.714165 | Up | teneurintransmembrane protein 1                                    |
| PRLHR      | 1.912351 | 0.006684 | 0.047973 | 2.712197 | Up | prolactin releasing hormone receptor                               |
| HAO1       | 1.901548 | 0.004154 | 0.03502  | 2.866261 | Up | hydroxyacid oxidase 1                                              |
| SLC22A11   | 1.873469 | 0.006672 | 0.047915 | 2.7128   | Up | solute carrier family 22 member 11                                 |
| LOC729080  | 1.856377 | 0.007083 | 0.049857 | 2.692934 | Up | glycine cleavage system protein H (aminomethyl carrier) pseudogene |
| PEMT       | 1.849123 | 7.27E-06 | 0.000386 | 4.485648 | Up | phosphatidylethanolamine N-methyltransferase                       |
| LY6H       | 1.840253 | 0.0016   | 0.017903 | 3.155867 | Up | lymphocyte antigen 6 family member H                               |
| FAM205A    | 1.836628 | 0.004029 | 0.034239 | 2.875852 | Up | family with sequence similarity 205 member A                       |
| TMEM236    | 1.814489 | 0.000914 | 0.012245 | 3.315815 | Up | transmembrane protein 236                                          |
| KCNJ13     | 1.809864 | 0.004278 | 0.035664 | 2.856913 | Up | potassium inwardly rectifying channel subfamily J member 13        |
| FAP        | 1.803439 | 0.000962 | 0.01274  | 3.301429 | Up | fibroblast activation protein alpha                                |
| EYA4       | 1.800375 | 0.003266 | 0.029605 | 2.941492 | Up | EYA transcriptional coactivator and phosphatase 4                  |
| BTBD11     | 1.791996 | 0.002099 | 0.021686 | 3.075855 | Up | BTB domain containing 11                                           |
| OR5J2      | 1.786096 | 0.000858 | 0.011727 | 3.333497 | Up | olfactory receptor family 5 subfamily J member 2                   |
| FBP2       | 1.783474 | 0.001941 | 0.020527 | 3.099056 | Up | fructose-bisphosphatase 2                                          |
| LCE3E      | 1.78332  | 0.000904 | 0.012149 | 3.318662 | Up | late cornified envelope 3E                                         |
| ZNF554     | 1.777372 | 0.000256 | 0.005002 | 3.656153 | Up | zinc finger protein 554                                            |
| OR10H1     | 1.769139 | 0.001545 | 0.017516 | 3.166037 | Up | olfactory receptor family 10 subfamily H member 1                  |
| AQP7P1     | 1.76578  | 0.000244 | 0.004837 | 3.668581 | Up | aquaporin 7 pseudogene 1                                           |
| EGR1       | 1.751068 | 8.94E-07 | 7.97E-05 | 4.913629 | Up | early growth response 1                                            |
| CSGALNACT1 | 1.736673 | 0.000245 | 0.004842 | 3.666956 | Up | chondroitin sulfate N-acetylgalactosaminyltransferase 1            |
| MT2A       | 1.736195 | 7.33E-07 | 6.80E-05 | 4.952342 | Up | metallothionein 2A                                                 |
| MAL        | 1.723595 | 5.94E-06 | 0.000338 | 4.528542 | Up | mal, T cell differentiation protein                                |
| SLC38A4    | 1.716457 | 0.00026  | 0.00507  | 3.652138 | Up | solute carrier family 38 member 4                                  |

|           |          |          |          |          |    |                                                            |
|-----------|----------|----------|----------|----------|----|------------------------------------------------------------|
| GCG       | 1.704823 | 0.004274 | 0.035664 | 2.857184 | Up | glucagon                                                   |
| OR13D1    | 1.699677 | 0.004653 | 0.037774 | 2.830118 | Up | olfactory receptor family 13 subfamily D member 1          |
| ASIC1     | 1.678655 | 0.00502  | 0.039748 | 2.805723 | Up | acid sensing ion channel subunit 1                         |
| MMP16     | 1.671308 | 0.005478 | 0.041991 | 2.777507 | Up | matrix metalloproteinase 16                                |
| ADAMTS8   | 1.657804 | 0.005782 | 0.043574 | 2.759899 | Up | ADAM metalloproteinase with thrombospondin type 1 motif 8  |
| PTGER4    | 1.653859 | 3.38E-07 | 3.75E-05 | 5.101075 | Up | prostaglandin E receptor 4                                 |
| TMEM201   | 1.653235 | 5.59E-10 | 2.16E-07 | 6.201596 | Up | transmembrane protein 201                                  |
| FLJ40194  | 1.624297 | 0.004189 | 0.035182 | 2.863583 | Up | uncharacterized FLJ40194                                   |
| SPATA31C2 | 1.606051 | 0.007008 | 0.049527 | 2.696447 | Up | SPATA31 subfamily C member 2                               |
| COL6A3    | 1.59849  | 2.57E-08 | 4.74E-06 | 5.56868  | Up | collagen type VI alpha 3 chain                             |
| MAPK4     | 1.583571 | 0.002391 | 0.023885 | 3.0368   | Up | mitogen-activated protein kinase 4                         |
| OAS2      | 1.57667  | 0.002062 | 0.02144  | 3.08113  | Up | 2'-5'-oligoadenylate synthetase 2                          |
| AQP7      | 1.564682 | 2.01E-05 | 0.000792 | 4.263552 | Up | aquaporin 7                                                |
| SLC25A48  | 1.563621 | 0.001616 | 0.017994 | 3.152948 | Up | solute carrier family 25 member 48                         |
| ETV4      | 1.562936 | 0.000269 | 0.005148 | 3.643839 | Up | ETS variant transcription factor 4                         |
| MAOB      | 1.561413 | 1.32E-08 | 2.88E-06 | 5.683282 | Up | monoamine oxidase B                                        |
| C2CD4B    | 1.560294 | 1.38E-11 | 9.97E-09 | 6.760282 | Up | C2 calcium dependent domain containing 4B                  |
| CCDC178   | 1.555319 | 0.006459 | 0.046949 | 2.723504 | Up | coiled-coil domain containing 178                          |
| GPC6      | 1.545071 | 0.000569 | 0.008694 | 3.445993 | Up | glypican 6                                                 |
| KCNJ2     | 1.54264  | 0.005658 | 0.042973 | 2.766965 | Up | potassium inwardly rectifying channel subfamily J member 2 |
| OR5D14    | 1.535933 | 0.004061 | 0.034442 | 2.873396 | Up | olfactory receptor family 5 subfamily D member 14          |
| MT1E      | 1.527259 | 4.13E-05 | 0.001326 | 4.100352 | Up | metallothionein 1E                                         |
| SOCS5     | 1.523522 | 0.002001 | 0.02099  | 3.090019 | Up | suppressor of cytokine signaling 5                         |
| GMNC      | 1.517516 | 0.001378 | 0.016174 | 3.199272 | Up | geminin coiled-coil domain containing                      |
| BCL9      | 1.517476 | 6.32E-05 | 0.00178  | 4.00057  | Up | BCL9 transcription coactivator                             |
| PDK3      | 1.516039 | 5.57E-05 | 0.001659 | 4.030114 | Up | pyruvate dehydrogenase kinase 3                            |
| ABCC9     | 1.508688 | 3.88E-05 | 0.001266 | 4.114451 | Up | ATP binding cassette subfamily C member 9                  |
| POU6F2    | 1.507127 | 0.000877 | 0.011878 | 3.327431 | Up | POU class 6 homeobox 2                                     |
| BTG2      | 1.506976 | 1.08E-05 | 0.000512 | 4.40043  | Up | BTG anti-proliferation factor 2                            |
| A4GNT     | 1.487207 | 0.006669 | 0.047915 | 2.712924 | Up | alpha-1,4-N-acetylglucosaminyltransferase                  |
| CST6      | 1.474865 | 0.005179 | 0.040581 | 2.795655 | Up | cystatin E/M                                               |
| CELP      | 1.456416 | 0.000752 | 0.010713 | 3.369855 | Up | carboxyl ester lipase pseudogene                           |
| PRR15     | 1.44211  | 4.79E-05 | 0.001473 | 4.065781 | Up | proline rich 15                                            |
| VEGFC     | 1.439026 | 0.000138 | 0.00323  | 3.81237  | Up | vascular endothelial growth factor C                       |
| FAM20C    | 1.417883 | 3.53E-07 | 3.87E-05 | 5.092481 | Up | FAM20C golgi associated secretory pathway kinase           |
| MPZ       | 1.412425 | 0.001225 | 0.015005 | 3.232986 | Up | myelin protein zero                                        |
| C16orf89  | 1.406088 | 0.002355 | 0.023671 | 3.041349 | Up | chromosome 16 open reading frame 89                        |
| USP27X    | 1.405375 | 2.98E-05 | 0.001061 | 4.175094 | Up | ubiquitin specific peptidase 27 X-linked                   |
| STK32B    | 1.401504 | 0.00137  | 0.016106 | 3.200934 | Up | serine/threonine kinase 32B                                |
| TMEM176A  | 1.395841 | 0.001167 | 0.014603 | 3.24678  | Up | transmembrane protein 176A                                 |
| KLK13     | 1.39366  | 0.003137 | 0.028793 | 2.95399  | Up | kallikrein related peptidase 13                            |
| RPS6      | 1.393238 | 0.000141 | 0.003288 | 3.806963 | Up | ribosomal protein S6                                       |
| ID3       | 1.379774 | 0.001032 | 0.01339  | 3.281721 | Up | inhibitor of DNA binding 3, HLH protein                    |

|          |          |          |          |          |    |                                                          |
|----------|----------|----------|----------|----------|----|----------------------------------------------------------|
| PGAP2    | 1.372801 | 0.003315 | 0.029859 | 2.936936 | Up | post-GPI attachment to proteins 2                        |
| ALOXE3   | 1.371318 | 0.005208 | 0.040713 | 2.793904 | Up | arachidonateloxygenase 3                                 |
| LSM11    | 1.370033 | 0.000167 | 0.003679 | 3.763746 | Up | LSM11, U7 small nuclear RNA associated                   |
| BCAP31   | 1.366767 | 0.000323 | 0.005863 | 3.596276 | Up | B cell receptor associated protein 31                    |
| DDIT4    | 1.357877 | 2.95E-05 | 0.001054 | 4.177066 | Up | DNA damage inducible transcript 4                        |
| DPP4     | 1.354505 | 0.000874 | 0.01186  | 3.328261 | Up | dipeptidyl peptidase 4                                   |
| TYSND1   | 1.351009 | 1.59E-09 | 5.04E-07 | 6.035046 | Up | trypsin like peroxisomal matrix peptidase 1              |
| IRF2BP2  | 1.34637  | 5.95E-18 | 2.15E-14 | 8.633426 | Up | interferon regulatory factor 2 binding protein 2         |
| KLF15    | 1.343721 | 1.94E-06 | 0.000145 | 4.760024 | Up | Kruppel like factor 15                                   |
| PCDHB7   | 1.334027 | 0.002902 | 0.027259 | 2.97794  | Up | protocadherin beta 7                                     |
| EGR3     | 1.31896  | 0.00597  | 0.044535 | 2.749441 | Up | early growth response 3                                  |
| RNF165   | 1.312414 | 0.004877 | 0.038959 | 2.815046 | Up | ring finger protein 165                                  |
| GRPR     | 1.2879   | 0.000461 | 0.007519 | 3.502487 | Up | gastrin releasing peptide receptor                       |
| SLC10A5  | 1.281611 | 0.000367 | 0.006373 | 3.562596 | Up | solute carrier family 10 member 5                        |
| AQP8     | 1.275576 | 0.000165 | 0.003653 | 3.767345 | Up | aquaporin 8                                              |
| SLC22A17 | 1.275441 | 0.005167 | 0.040504 | 2.796408 | Up | solute carrier family 22 member 17                       |
| PHLDA1   | 1.265    | 7.26E-07 | 6.77E-05 | 4.954344 | Up | pleckstrin homology like domain family A member 1        |
| FAM86B2  | 1.261397 | 0.00011  | 0.002723 | 3.868009 | Up | family with sequence similarity 86 member B2             |
| TNXA     | 1.26094  | 0.000548 | 0.008447 | 3.456266 | Up | tenascin XA (pseudogene)                                 |
| LTBP4    | 1.249779 | 1.25E-10 | 6.48E-08 | 6.432767 | Up | latent transforming growth factor beta binding protein 4 |
| IKZF4    | 1.247809 | 0.005701 | 0.043119 | 2.764503 | Up | IKAROS family zinc finger 4                              |
| CREB3L1  | 1.240081 | 0.001747 | 0.019045 | 3.13026  | Up | cAMP responsive element binding protein 3 like 1         |
| A1CF     | 1.237404 | 0.000302 | 0.00558  | 3.613598 | Up | APOBEC1 complementation factor                           |
| EMX1     | 1.231921 | 0.007097 | 0.049918 | 2.692267 | Up | empty spiracles homeobox 1                               |
| NAT10    | 1.230925 | 0.000288 | 0.005418 | 3.625785 | Up | N-acetyltransferase 10                                   |
| NETO2    | 1.226436 | 2.78E-05 | 0.001004 | 4.191134 | Up | neuropilin and tolloid like 2                            |
| ACSL6    | 1.22516  | 0.000699 | 0.010166 | 3.390161 | Up | acyl-CoA synthetase long chain family member 6           |
| KLF3     | 1.222656 | 2.23E-09 | 6.52E-07 | 5.979866 | Up | Kruppel like factor 3                                    |
| ZFP36    | 1.222469 | 2.71E-07 | 3.23E-05 | 5.142302 | Up | ZFP36 ring finger protein                                |
| QDPR     | 1.212418 | 0.000429 | 0.007144 | 3.521702 | Up | quinoxindihydropteridinereductase                        |
| OAS1     | 1.211224 | 0.004602 | 0.03752  | 2.833639 | Up | 2'-5'-oligoadenylate synthetase 1                        |
| ETV5     | 1.20819  | 3.13E-06 | 0.00021  | 4.662414 | Up | ETS variant transcription factor 5                       |
| GRIK5    | 1.206035 | 0.002239 | 0.022781 | 3.056565 | Up | glutamate ionotropic receptor kainate type subunit 5     |
| KL       | 1.201704 | 0.006204 | 0.045712 | 2.736802 | Up | klotho                                                   |
| ZNF385C  | 1.200196 | 0.00318  | 0.029058 | 2.94975  | Up | zinc finger protein 385C                                 |
| TMEM168  | 1.200047 | 0.001202 | 0.014842 | 3.238427 | Up | transmembrane protein 168                                |
| GADD45B  | 1.195691 | 6.00E-06 | 0.000339 | 4.526504 | Up | growth arrest and DNA damage inducible beta              |
| SLC29A3  | 1.193652 | 1.40E-05 | 0.000618 | 4.344205 | Up | solute carrier family 29 member 3                        |
| GPR63    | 1.189122 | 5.77E-05 | 0.001693 | 4.022037 | Up | G protein-coupled receptor 63                            |
| MAN1A1   | 1.187174 | 5.53E-06 | 0.000322 | 4.54348  | Up | mannosidase alpha class 1A member 1                      |
| NXN      | 1.184622 | 3.38E-05 | 0.001161 | 4.146023 | Up | nucleoredoxin                                            |
| CGREF1   | 1.181501 | 0.004649 | 0.037769 | 2.830375 | Up | cell growth regulator with EF-hand domain 1              |
| TLE3     | 1.181041 | 1.46E-09 | 4.91E-07 | 6.048256 | Up | TLE family member 3, transcriptional corepressor         |

|            |          |          |          |          |    |                                                                   |
|------------|----------|----------|----------|----------|----|-------------------------------------------------------------------|
| RPL8       | 1.175798 | 8.84E-06 | 0.000445 | 4.443715 | Up | ribosomal protein L8                                              |
| HEYL       | 1.175375 | 7.83E-05 | 0.002098 | 3.94967  | Up | hes related family bHLH transcription factor with YRPW motif like |
| PER3       | 1.174824 | 2.57E-06 | 0.00018  | 4.702617 | Up | period circadian regulator 3                                      |
| CXXC4      | 1.172558 | 0.000526 | 0.008232 | 3.46716  | Up | CXXC finger protein 4                                             |
| HRAS       | 1.17075  | 4.69E-05 | 0.001454 | 4.070447 | Up | HRas proto-oncogene, GTPase                                       |
| GLI3       | 1.168455 | 0.00011  | 0.002728 | 3.866542 | Up | GLI family zinc finger 3                                          |
| SYCN       | 1.16423  | 0.001588 | 0.017817 | 3.158183 | Up | syncollin                                                         |
| WDR89      | 1.15871  | 0.003082 | 0.028428 | 2.959443 | Up | WD repeat domain 89                                               |
| KIAA0408   | 1.156987 | 0.00359  | 0.031565 | 2.912147 | Up | KIAA0408                                                          |
| SFTPD      | 1.156467 | 0.000869 | 0.011855 | 3.329763 | Up | surfactant protein D                                              |
| MYC        | 1.155459 | 0.000232 | 0.004664 | 3.68131  | Up | MYC proto-oncogene, bHLH transcription factor                     |
| TTI1       | 1.153438 | 7.67E-06 | 0.000403 | 4.474283 | Up | TELO2 interacting protein 1                                       |
| IFIT3      | 1.153223 | 0.001484 | 0.017069 | 3.177774 | Up | interferon induced protein with tetratricopeptide repeats 3       |
| IGSF8      | 1.147182 | 3.42E-05 | 0.00117  | 4.143533 | Up | immunoglobulin superfamily member 8                               |
| RPRD2      | 1.136951 | 4.05E-09 | 1.04E-06 | 5.882334 | Up | regulation of nuclear pre-mRNA domain containing 2                |
| MT1JP      | 1.135989 | 0.002674 | 0.025796 | 3.002974 | Up | metallothionein 1J, pseudogene                                    |
| SNORA81    | 1.134404 | 7.05E-05 | 0.001942 | 3.974527 | Up | small nucleolar RNA, H/ACA box 81                                 |
| DMD        | 1.134394 | 0.0025   | 0.024649 | 3.02331  | Up | dystrophin                                                        |
| ZNF416     | 1.12885  | 3.44E-06 | 0.00022  | 4.642339 | Up | zinc finger protein 416                                           |
| AQP12B     | 1.122447 | 0.003687 | 0.032134 | 2.903728 | Up | aquaporin 12B                                                     |
| FKBP8      | 1.12091  | 0.000337 | 0.006069 | 3.585204 | Up | FKBP prolylisomerase 8                                            |
| IRS1       | 1.109776 | 2.50E-09 | 7.07E-07 | 5.961342 | Up | insulin receptor substrate 1                                      |
| KIAA1958   | 1.104138 | 2.20E-07 | 2.72E-05 | 5.181865 | Up | KIAA1958                                                          |
| RPS28      | 1.099636 | 2.86E-10 | 1.25E-07 | 6.306441 | Up | ribosomal protein S28                                             |
| TMEM140    | 1.093078 | 0.00016  | 0.003573 | 3.774447 | Up | transmembrane protein 140                                         |
| DBP        | 1.092264 | 1.15E-06 | 9.80E-05 | 4.86439  | Up | D-box binding PAR bZIP transcription factor                       |
| MUC6       | 1.08831  | 0.005474 | 0.041981 | 2.777718 | Up | mucin 6, oligomeric mucus/gel-forming                             |
| MTCH1      | 1.088002 | 0.004192 | 0.035182 | 2.86336  | Up | mitochondrial carrier 1                                           |
| CHST10     | 1.086677 | 0.005118 | 0.040291 | 2.799519 | Up | carbohydrate sulfotransferase 10                                  |
| ABHD15     | 1.086125 | 0.000312 | 0.005712 | 3.605158 | Up | abhydrolase domain containing 15                                  |
| KLF9       | 1.080005 | 8.43E-13 | 9.53E-10 | 7.15394  | Up | Kruppel like factor 9                                             |
| EIF4B      | 1.06405  | 0.000817 | 0.011276 | 3.347136 | Up | eukaryotic translation initiation factor 4B                       |
| KLF10      | 1.055746 | 0.000299 | 0.005546 | 3.616276 | Up | Kruppel like factor 10                                            |
| PODXL      | 1.05305  | 1.75E-06 | 0.000137 | 4.780037 | Up | podocalyxin like                                                  |
| BVES       | 1.050529 | 0.000813 | 0.011258 | 3.348218 | Up | blood vessel epicardial substance                                 |
| GLTP       | 1.050372 | 5.80E-06 | 0.000333 | 4.533591 | Up | glycolipid transfer protein                                       |
| MNT        | 1.045232 | 2.72E-05 | 0.000992 | 4.195389 | Up | MAX network transcriptional repressor                             |
| LSR        | 1.044877 | 1.76E-05 | 0.000726 | 4.292801 | Up | lipolysis stimulated lipoprotein receptor                         |
| CEL        | 1.038816 | 0.002503 | 0.024649 | 3.023013 | Up | carboxyl ester lipase                                             |
| NUP205     | 1.036199 | 0.002925 | 0.027371 | 2.975558 | Up | nucleoporin 205                                                   |
| MT1L       | 1.036012 | 0.001676 | 0.018469 | 3.142292 | Up | metallothionein 1L, pseudogene                                    |
| FOSL2      | 1.035358 | 3.00E-05 | 0.001065 | 4.173687 | Up | FOS like 2, AP-1 transcription factor subunit                     |
| ACVR2B-AS1 | 1.03269  | 0.002713 | 0.026028 | 2.998466 | Up | ACVR2B antisense RNA 1                                            |



|          |          |          |          |          |    |                                                                |
|----------|----------|----------|----------|----------|----|----------------------------------------------------------------|
| SLC1A5   | 1.032611 | 0.000353 | 0.006238 | 3.572762 | Up | solute carrier family 1 member 5                               |
| ZNF362   | 1.03072  | 5.17E-06 | 0.000306 | 4.557695 | Up | zinc finger protein 362                                        |
| WASF1    | 1.029075 | 9.96E-05 | 0.002531 | 3.891542 | Up | WASP family member 1                                           |
| PAPSS2   | 1.024653 | 0.003229 | 0.029385 | 2.945045 | Up | 3'-phosphoadenosine 5'-phosphosulfate synthase 2               |
| TMCO4    | 1.023584 | 0.000267 | 0.005139 | 3.645801 | Up | transmembrane and coiled-coil domains 4                        |
| KIAA1549 | 1.022711 | 0.000159 | 0.003558 | 3.777019 | Up | KIAA1549                                                       |
| NR1D1    | 1.022533 | 0.002444 | 0.024264 | 3.030221 | Up | nuclear receptor subfamily 1 group D member 1                  |
| DUSP4    | 1.013696 | 5.02E-05 | 0.001535 | 4.054499 | Up | dual specificity phosphatase 4                                 |
| SNX19    | 1.013619 | 3.95E-05 | 0.001287 | 4.110135 | Up | sorting nexin 19                                               |
| SMCR8    | 1.013255 | 1.35E-05 | 0.000604 | 4.351545 | Up | SMCR8-C9orf72 complex subunit                                  |
| FECH     | 1.008972 | 1.98E-05 | 0.000786 | 4.267423 | Up | ferrochelatase                                                 |
| FOXN3    | 1.007664 | 3.12E-10 | 1.31E-07 | 6.292462 | Up | forkhead box N3                                                |
| IL6ST    | 1.006029 | 0.002468 | 0.024433 | 3.027296 | Up | interleukin 6 signal transducer                                |
| IL6R     | 0.999744 | 0.006884 | 0.048917 | 2.702392 | Up | interleukin 6 receptor                                         |
| PCDHB6   | 0.994986 | 0.005158 | 0.040486 | 2.796974 | Up | protocadherin beta 6                                           |
| ZNF581   | 0.993708 | 0.000106 | 0.00265  | 3.876665 | Up | zinc finger protein 581                                        |
| KLF6     | 0.991792 | 6.78E-07 | 6.43E-05 | 4.967609 | Up | Kruppel like factor 6                                          |
| CPA1     | 0.99028  | 0.003622 | 0.031696 | 2.909338 | Up | carboxypeptidase A1                                            |
| ABCA1    | 0.989596 | 0.000135 | 0.003174 | 3.817307 | Up | ATP binding cassette subfamily A member 1                      |
| ZFP36L1  | 0.983112 | 0.000597 | 0.009015 | 3.432766 | Up | ZFP36 ring finger protein like 1                               |
| PBX1     | 0.979927 | 4.02E-13 | 5.59E-10 | 7.254949 | Up | PBX homeobox 1                                                 |
| DYSF     | 0.977559 | 0.006334 | 0.046301 | 2.729951 | Up | dysferlin                                                      |
| SH3RF1   | 0.977474 | 0.000206 | 0.004295 | 3.711432 | Up | SH3 domain containing ring finger 1                            |
| PLEKHG6  | 0.975335 | 0.000311 | 0.0057   | 3.605994 | Up | pleckstrin homology and RhoGEF domain containing G6            |
| URM1     | 0.974945 | 1.43E-08 | 3.05E-06 | 5.670336 | Up | ubiquitin related modifier 1                                   |
| ERN1     | 0.974217 | 0.000112 | 0.002749 | 3.86398  | Up | endoplasmic reticulum to nucleus signaling 1                   |
| RPL18    | 0.972875 | 1.59E-06 | 0.000129 | 4.799987 | Up | ribosomal protein L18                                          |
| CNTN3    | 0.966787 | 0.001627 | 0.018064 | 3.151099 | Up | contactin 3                                                    |
| CYGB     | 0.960228 | 4.03E-05 | 0.001303 | 4.105482 | Up | cytoglobin                                                     |
| RNF24    | 0.952932 | 0.000767 | 0.010872 | 3.364507 | Up | ring finger protein 24                                         |
| ABCG2    | 0.942728 | 0.002598 | 0.025251 | 3.011741 | Up | ATP binding cassette subfamily G member 2 (Junior blood group) |
| PRRC1    | 0.940958 | 1.44E-05 | 0.000633 | 4.337711 | Up | proline rich coiled-coil 1                                     |
| NHEJ1    | 0.940305 | 0.005191 | 0.040636 | 2.794938 | Up | non-homologous end joining factor 1                            |
| PDK2     | 0.936816 | 1.05E-05 | 0.000505 | 4.406224 | Up | pyruvate dehydrogenase kinase 2                                |
| BOC      | 0.933366 | 6.19E-06 | 0.000345 | 4.519766 | Up | BOC cell adhesion associated, oncogene regulated               |
| PNPLA4   | 0.92827  | 1.98E-09 | 6.00E-07 | 5.999168 | Up | patatin like phospholipase domain containing 4                 |
| SELENBP1 | 0.925116 | 5.37E-07 | 5.49E-05 | 5.012682 | Up | selenium binding protein 1                                     |
| STAT1    | 0.92016  | 2.19E-08 | 4.26E-06 | 5.596302 | Up | signal transducer and activator of transcription 1             |
| TMC4     | 0.918004 | 7.50E-06 | 0.000396 | 4.479012 | Up | transmembrane channel like 4                                   |
| HSPA2    | 0.917681 | 0.000234 | 0.004701 | 3.678748 | Up | heat shock protein family A (Hsp70) member 2                   |
| DUSP1    | 0.916798 | 6.01E-06 | 0.000339 | 4.526156 | Up | dual specificity phosphatase 1                                 |
| CLSTN2   | 0.915169 | 0.000756 | 0.010747 | 3.368549 | Up | calsynenin 2                                                   |
| DIP2B    | 0.914675 | 3.23E-05 | 0.001126 | 4.156545 | Up | disco interacting protein 2 homolog B                          |

|            |          |          |          |          |    |                                                                        |
|------------|----------|----------|----------|----------|----|------------------------------------------------------------------------|
| FMOD       | 0.902186 | 0.001186 | 0.01473  | 3.242196 | Up | fibromodulin                                                           |
| SNORA46    | 0.900951 | 0.006185 | 0.045618 | 2.737784 | Up | small nucleolar RNA, H/ACA box 46                                      |
| MYADM      | 0.899156 | 9.01E-06 | 0.000447 | 4.439634 | Up | myeloid associated differentiation marker                              |
| ARPC1A     | 0.896149 | 8.17E-09 | 1.92E-06 | 5.764985 | Up | actin related protein 2/3 complex subunit 1A                           |
| PCDHB11    | 0.894232 | 0.006266 | 0.045933 | 2.733512 | Up | protocadherin beta 11                                                  |
| KCTD12     | 0.89297  | 0.000774 | 0.010938 | 3.361758 | Up | potassium channel tetramerization domain containing 12                 |
| APOD       | 0.89142  | 0.00345  | 0.030622 | 2.924542 | Up | apolipoprotein D                                                       |
| GLS        | 0.884954 | 0.00026  | 0.00507  | 3.652426 | Up | glutaminase                                                            |
| FBXO32     | 0.881866 | 3.15E-06 | 0.000211 | 4.660468 | Up | F-box protein 32                                                       |
| ST6GALNAC6 | 0.879554 | 2.07E-05 | 0.000809 | 4.257572 | Up | ST6 N-acetylgalactosaminide alpha-2,6-sialyltransferase 6              |
| SRM        | 0.878308 | 0.000309 | 0.005677 | 3.607559 | Up | spermidine synthase                                                    |
| DIRAS3     | 0.876306 | 0.003122 | 0.028685 | 2.955463 | Up | DIRAS family GTPase 3                                                  |
| NR0B2      | 0.874431 | 7.41E-05 | 0.002024 | 3.962782 | Up | nuclear receptor subfamily 0 group B member 2                          |
| NHS        | 0.87443  | 0.005302 | 0.041077 | 2.788104 | Up | NHS actin remodeling regulator                                         |
| SYVN1      | 0.872096 | 0.000139 | 0.003248 | 3.810686 | Up | synoviolin 1                                                           |
| ARL6IP1    | 0.872037 | 0.001505 | 0.017219 | 3.173755 | Up | ADP ribosylation factor like GTPase 6 interacting protein 1            |
| TCF7L2     | 0.871267 | 8.46E-06 | 0.000435 | 4.45327  | Up | transcription factor 7 like 2                                          |
| TMUB1      | 0.869907 | 2.94E-05 | 0.00105  | 4.178279 | Up | transmembrane and ubiquitin like domain containing 1                   |
| SNHG9      | 0.868128 | 0.000191 | 0.004072 | 3.730146 | Up | small nucleolar RNA host gene 9                                        |
| DHRS11     | 0.86627  | 5.84E-08 | 9.11E-06 | 5.423684 | Up | dehydrogenase/reductase 11                                             |
| MRPL37     | 0.864054 | 1.60E-06 | 0.000129 | 4.79874  | Up | mitochondrial ribosomal protein L37                                    |
| DLL4       | 0.858948 | 0.003304 | 0.029823 | 2.937894 | Up | delta like canonical Notch ligand 4                                    |
| HELZ2      | 0.856157 | 8.62E-05 | 0.002263 | 3.926561 | Up | helicase with zinc finger 2                                            |
| NNMT       | 0.851608 | 0.001206 | 0.014883 | 3.237453 | Up | nicotinamide N-methyltransferase                                       |
| SMAD1      | 0.850932 | 1.92E-07 | 2.46E-05 | 5.206868 | Up | SMAD family member 1                                                   |
| TP53       | 0.850773 | 0.000201 | 0.004226 | 3.717618 | Up | tumor protein p53                                                      |
| PCDH18     | 0.850737 | 0.000247 | 0.004858 | 3.665575 | Up | protocadherin 18                                                       |
| FAM160B2   | 0.848165 | 0.00339  | 0.030322 | 2.929974 | Up | family with sequence similarity 160 member B2                          |
| ELK1       | 0.84679  | 7.59E-05 | 0.002058 | 3.957072 | Up | ETS transcription factor ELK1                                          |
| SUN2       | 0.846146 | 4.47E-08 | 7.36E-06 | 5.471101 | Up | Sad1 and UNC84 domain containing 2                                     |
| TMEM150A   | 0.84345  | 7.57E-07 | 6.88E-05 | 4.946241 | Up | transmembrane protein 150A                                             |
| PTBP1      | 0.84235  | 1.45E-05 | 0.000636 | 4.335712 | Up | polypyrimidine tract binding protein 1                                 |
| SOS1       | 0.842032 | 1.25E-05 | 0.000573 | 4.369507 | Up | SOS Ras/Rac guanine nucleotide exchange factor 1                       |
| PRKACA     | 0.841424 | 0.000208 | 0.004333 | 3.708612 | Up | protein kinase cAMP-activated catalytic subunit alpha                  |
| BACH2      | 0.840276 | 0.004124 | 0.034884 | 2.868539 | Up | BTB domain and CNC homolog 2                                           |
| TOR2A      | 0.838785 | 0.000805 | 0.011164 | 3.351168 | Up | torsin family 2 member A                                               |
| CTSF       | 0.836129 | 6.47E-06 | 0.000355 | 4.51037  | Up | cathepsin F                                                            |
| EGFR       | 0.835307 | 0.002303 | 0.023314 | 3.048103 | Up | epidermal growth factor receptor                                       |
| ETS1       | 0.834376 | 0.002812 | 0.0267   | 2.987581 | Up | ETS proto-oncogene 1, transcription factor                             |
| PIK3CA     | 0.834263 | 9.81E-06 | 0.000476 | 4.421306 | Up | phosphatidylinositol-4,5-bisphosphate 3-kinase catalytic subunit alpha |
| ZNRF1      | 0.834005 | 0.000348 | 0.006201 | 3.57648  | Up | zinc and ring finger 1                                                 |
| CMPK2      | 0.833442 | 0.000382 | 0.006568 | 3.552511 | Up | cytidine/uridine monophosphate kinase 2                                |
| C17orf49   | 0.831035 | 6.49E-08 | 9.94E-06 | 5.404842 | Up | chromosome 17 open reading frame 49                                    |

|           |          |          |          |          |    |                                                            |
|-----------|----------|----------|----------|----------|----|------------------------------------------------------------|
| GUK1      | 0.830906 | 0.005863 | 0.043941 | 2.755329 | Up | guanylate kinase 1                                         |
| TSHZ1     | 0.830001 | 0.001412 | 0.016467 | 3.192239 | Up | teashirt zinc finger homeobox 1                            |
| ZNF326    | 0.829871 | 2.09E-05 | 0.000816 | 4.255297 | Up | zinc finger protein 326                                    |
| MED13L    | 0.825296 | 1.99E-05 | 0.000788 | 4.266458 | Up | mediator complex subunit 13L                               |
| GCNT2     | 0.824275 | 0.006687 | 0.047973 | 2.712061 | Up | glucosaminyl (N-acetyl) transferase 2 (I blood group)      |
| SAE1      | 0.821934 | 1.76E-05 | 0.000726 | 4.292772 | Up | SUMO1 activating enzyme subunit 1                          |
| GTPBP8    | 0.820509 | 1.28E-06 | 0.000107 | 4.842977 | Up | GTP binding protein 8 (putative)                           |
| PKN1      | 0.820314 | 9.18E-05 | 0.002377 | 3.911368 | Up | protein kinase N1                                          |
| TNFRSF1A  | 0.819517 | 8.65E-06 | 0.000442 | 4.448543 | Up | TNF receptor superfamily member 1A                         |
| ELOVL1    | 0.818479 | 2.24E-06 | 0.000163 | 4.730554 | Up | ELOVL fatty acid elongase 1                                |
| TUT1      | 0.81736  | 0.000101 | 0.002556 | 3.887148 | Up | terminal uridylyltransferase 1, U6 snRNA-specific          |
| NCSTN     | 0.814539 | 5.60E-10 | 2.16E-07 | 6.201177 | Up | nicastatin                                                 |
| MFAP2     | 0.814276 | 0.004538 | 0.037128 | 2.838125 | Up | microfibril associated protein 2                           |
| YBX1      | 0.812937 | 9.16E-05 | 0.002377 | 3.911852 | Up | Y-box binding protein 1                                    |
| PPP1R3B   | 0.810696 | 0.000614 | 0.009215 | 3.425208 | Up | protein phosphatase 1 regulatory subunit 3B                |
| PLCE1     | 0.80763  | 0.005261 | 0.040902 | 2.790596 | Up | phospholipase C epsilon 1                                  |
| NDST1     | 0.801304 | 1.38E-10 | 6.95E-08 | 6.417856 | Up | N-deacetylase and N-sulfotransferase 1                     |
| KCNJ8     | 0.800647 | 0.000248 | 0.004871 | 3.664642 | Up | potassium inwardly rectifying channel subfamily J member 8 |
| ATF6B     | 0.795539 | 5.53E-06 | 0.000322 | 4.543457 | Up | activating transcription factor 6 beta                     |
| GAMT      | 0.794851 | 0.000283 | 0.00535  | 3.630634 | Up | guanidinoacetate N-methyltransferase                       |
| DGCR2     | 0.792202 | 0.000263 | 0.005112 | 3.649418 | Up | DiGeorge syndrome critical region gene 2                   |
| ME2       | 0.792173 | 0.002342 | 0.02356  | 3.043104 | Up | malic enzyme 2                                             |
| SNORA70F  | 0.791991 | 0.001262 | 0.015252 | 3.22447  | Up | small nucleolar RNA, H/ACA box 70F                         |
| TPI1      | 0.791213 | 0.000701 | 0.010178 | 3.389207 | Up | triosephosphate isomerase 1                                |
| JMJD8     | 0.790139 | 3.01E-05 | 0.001068 | 4.172555 | Up | jumonji domain containing 8                                |
| NES       | 0.788137 | 1.56E-05 | 0.000667 | 4.320476 | Up | nestin                                                     |
| CDC42EP3  | 0.787657 | 0.006527 | 0.047324 | 2.72008  | Up | CDC42 effector protein 3                                   |
| SECISBP2L | 0.785942 | 0.002747 | 0.026216 | 2.994768 | Up | SECIS binding protein 2 like                               |
| PRPF8     | 0.785467 | 4.09E-05 | 0.001317 | 4.102281 | Up | pre-mRNA processing factor 8                               |
| DNAJC4    | 0.784209 | 1.19E-06 | 0.000101 | 4.856749 | Up | DnaJ heat shock protein family (Hsp40) member C4           |
| EIF3B     | 0.783198 | 4.65E-05 | 0.001445 | 4.072672 | Up | eukaryotic translation initiation factor 3 subunit B       |
| EPHX1     | 0.78283  | 0.000166 | 0.003661 | 3.766555 | Up | epoxide hydrolase 1                                        |
| WDTC1     | 0.782558 | 8.41E-06 | 0.000434 | 4.454475 | Up | WD and tetratricopeptide repeats 1                         |
| MAML1     | 0.78192  | 2.54E-05 | 0.000933 | 4.210975 | Up | mastermind like transcriptional coactivator 1              |
| PCDHB4    | 0.779944 | 0.00151  | 0.01726  | 3.172676 | Up | protocadherin beta 4                                       |
| CRNKL1    | 0.776112 | 0.001354 | 0.015976 | 3.204332 | Up | crooked neck pre-mRNA splicing factor 1                    |
| NFIB      | 0.775622 | 0.005204 | 0.040705 | 2.794109 | Up | nuclear factor I B                                         |
| MAPK3     | 0.774729 | 6.63E-06 | 0.000361 | 4.505204 | Up | mitogen-activated protein kinase 3                         |
| SLC23A2   | 0.771981 | 0.005612 | 0.042695 | 2.769626 | Up | solute carrier family 23 member 2                          |
| RPL18A    | 0.771037 | 0.000204 | 0.004258 | 3.713912 | Up | ribosomal protein L18a                                     |
| FAM83B    | 0.769782 | 0.000435 | 0.007223 | 3.51776  | Up | family with sequence similarity 83 member B                |
| CNDP2     | 0.768381 | 0.000586 | 0.008901 | 3.43821  | Up | carnosinedipeptidase 2                                     |
| SERTAD2   | 0.768202 | 3.98E-05 | 0.001293 | 4.108585 | Up | SERTA domain containing 2                                  |

|          |          |          |          |          |    |                                                                  |
|----------|----------|----------|----------|----------|----|------------------------------------------------------------------|
| RCE1     | 0.76665  | 0.000172 | 0.003741 | 3.757149 | Up | Ras converting CAAX endopeptidase 1                              |
| C2orf69  | 0.766464 | 8.05E-05 | 0.002142 | 3.942914 | Up | chromosome 2 open reading frame 69                               |
| FOXK1    | 0.764006 | 0.001585 | 0.0178   | 3.158636 | Up | forkhead box K1                                                  |
| ZNF646   | 0.763811 | 0.000536 | 0.00834  | 3.462129 | Up | zinc finger protein 646                                          |
| CAMSAP3  | 0.762877 | 1.95E-05 | 0.000779 | 4.271089 | Up | calmodulin regulated spectrin associated protein family member 3 |
| ACVR2B   | 0.761578 | 2.49E-05 | 0.000919 | 4.215416 | Up | activin A receptor type 2B                                       |
| ATXN7L1  | 0.761216 | 0.001983 | 0.020842 | 3.09281  | Up | ataxin 7 like 1                                                  |
| LRRC8B   | 0.761015 | 0.000468 | 0.007577 | 3.49819  | Up | leucine rich repeat containing 8 VRAC subunit B                  |
| PLOD3    | 0.760059 | 3.88E-05 | 0.001266 | 4.114231 | Up | procollagen-lysine,2-oxoglutarate 5-dioxygenase 3                |
| FAM193B  | 0.758019 | 1.78E-05 | 0.000726 | 4.291384 | Up | family with sequence similarity 193 member B                     |
| ZFH3     | 0.757752 | 0.001036 | 0.013414 | 3.280609 | Up | zinc finger homeobox 3                                           |
| SMURF1   | 0.756591 | 1.06E-05 | 0.000508 | 4.404419 | Up | SMAD specific E3 ubiquitin protein ligase 1                      |
| AOX1     | 0.756086 | 0.003594 | 0.031565 | 2.911801 | Up | aldehyde oxidase 1                                               |
| RPS15    | 0.755554 | 6.99E-07 | 6.59E-05 | 4.961597 | Up | ribosomal protein S15                                            |
| PRMT6    | 0.753247 | 0.001239 | 0.01511  | 3.22983  | Up | protein arginine methyltransferase 6                             |
| TRIM24   | 0.752928 | 1.16E-05 | 0.000543 | 4.384086 | Up | tripartite motif containing 24                                   |
| PRKCSH   | 0.750891 | 0.000284 | 0.005365 | 3.629653 | Up | protein kinase C substrate 80K-H                                 |
| ETV6     | 0.75061  | 9.73E-07 | 8.46E-05 | 4.896989 | Up | ETS variant transcription factor 6                               |
| GSK3A    | 0.7503   | 0.000194 | 0.004091 | 3.727348 | Up | glycogen synthase kinase 3 alpha                                 |
| WDR74    | 0.749277 | 0.000605 | 0.009092 | 3.429532 | Up | WD repeat domain 74                                              |
| KCNC4    | 0.746517 | 0.002407 | 0.023989 | 3.03483  | Up | potassium voltage-gated channel subfamily C member 4             |
| LARP6    | 0.745789 | 7.94E-05 | 0.002124 | 3.946332 | Up | La ribonucleoprotein 6, translational regulator                  |
| BCOR     | 0.744144 | 0.00012  | 0.002934 | 3.845436 | Up | BCL6 corepressor                                                 |
| PSD4     | 0.741924 | 0.005215 | 0.040726 | 2.793473 | Up | pleckstrin and Sec7 domain containing 4                          |
| URB1     | 0.74192  | 6.05E-05 | 0.00174  | 4.01084  | Up | URB1 ribosome biogenesis homolog                                 |
| RAB4A    | 0.740681 | 0.000763 | 0.010829 | 3.365815 | Up | RAB4A, member RAS oncogene family                                |
| ZNF341   | 0.740369 | 0.002638 | 0.025544 | 3.007083 | Up | zinc finger protein 341                                          |
| SGTA     | 0.740279 | 0.000162 | 0.003593 | 3.77241  | Up | small glutamine rich tetratricopeptide repeat containing alpha   |
| STUB1    | 0.739139 | 0.000973 | 0.012833 | 3.298143 | Up | STIP1 homology and U-box containing protein 1                    |
| SLC35E1  | 0.736682 | 9.91E-09 | 2.30E-06 | 5.732304 | Up | solute carrier family 35 member E1                               |
| RSBN1    | 0.73582  | 4.22E-08 | 7.07E-06 | 5.481284 | Up | round spermatid basic protein 1                                  |
| NPAS2    | 0.732705 | 3.23E-05 | 0.001126 | 4.156955 | Up | neuronal PAS domain protein 2                                    |
| MAOA     | 0.731781 | 4.31E-06 | 0.000262 | 4.595946 | Up | monoamine oxidase A                                              |
| USP1     | 0.728983 | 0.003174 | 0.029017 | 2.950339 | Up | ubiquitin specific peptidase 1                                   |
| RBM47    | 0.728968 | 1.56E-08 | 3.21E-06 | 5.654557 | Up | RNA binding motif protein 47                                     |
| RNF43    | 0.728384 | 0.000997 | 0.013032 | 3.291369 | Up | ring finger protein 43                                           |
| KIAA0930 | 0.728341 | 6.95E-05 | 0.001924 | 3.977861 | Up | KIAA0930                                                         |
| SHISA5   | 0.72744  | 0.000573 | 0.008736 | 3.444214 | Up | shisa family member 5                                            |
| TCOF1    | 0.727002 | 0.00054  | 0.008367 | 3.460175 | Up | treacle ribosome biogenesis factor 1                             |
| NCL      | 0.725941 | 0.002185 | 0.022354 | 3.063829 | Up | nucleolin                                                        |
| FKBP5    | 0.724631 | 7.85E-06 | 0.000411 | 4.469326 | Up | FKBP prolyl isomerase 5                                          |
| RBM22    | 0.723796 | 3.19E-06 | 0.000211 | 4.6585   | Up | RNA binding motif protein 22                                     |
| SLC48A1  | 0.720957 | 2.30E-05 | 0.000874 | 4.233151 | Up | solute carrier family 48 member 1                                |

|          |          |          |          |          |    |                                                         |
|----------|----------|----------|----------|----------|----|---------------------------------------------------------|
| GNL1     | 0.720727 | 0.000309 | 0.005676 | 3.607864 | Up | G protein nucleolar 1 (putative)                        |
| FOXP1    | 0.720205 | 1.58E-09 | 5.04E-07 | 6.036016 | Up | forkhead box P1                                         |
| TRAPPC3  | 0.719608 | 0.000551 | 0.008489 | 3.45471  | Up | trafficking protein particle complex 3                  |
| METTL14  | 0.718111 | 0.000565 | 0.008669 | 3.447662 | Up | methyltransferase like 14                               |
| PIGM     | 0.716435 | 0.000194 | 0.004091 | 3.727242 | Up | phosphatidylinositol glycan anchor biosynthesis class M |
| MZT2B    | 0.714175 | 0.001677 | 0.018471 | 3.142085 | Up | mitotic spindle organizing protein 2B                   |
| ATF7IP   | 0.712488 | 4.27E-09 | 1.07E-06 | 5.873211 | Up | activating transcription factor 7 interacting protein   |
| RWDD2B   | 0.711793 | 0.000232 | 0.00466  | 3.681821 | Up | RWD domain containing 2B                                |
| POLR1D   | 0.708737 | 0.005643 | 0.042875 | 2.767845 | Up | RNA polymerase I and III subunit D                      |
| UBIAD1   | 0.706576 | 8.09E-06 | 0.00042  | 4.46291  | Up | UbiAprenyltransferase domain containing 1               |
| SFXN2    | 0.700426 | 0.001682 | 0.018509 | 3.141299 | Up | sideroflexin 2                                          |
| FIGN     | 0.699523 | 3.68E-05 | 0.001226 | 4.126718 | Up | fidgetin, microtubule severing factor                   |
| UBAP2    | 0.699319 | 3.77E-08 | 6.56E-06 | 5.50114  | Up | ubiquitin associated protein 2                          |
| UBE2E2   | 0.699156 | 5.75E-05 | 0.001693 | 4.022695 | Up | ubiquitin conjugating enzyme E2 E2                      |
| MX1      | 0.698814 | 0.003319 | 0.029859 | 2.936555 | Up | MX dynamin like GTPase 1                                |
| SPPL3    | 0.697852 | 0.000696 | 0.010145 | 3.390959 | Up | signal peptide peptidase like 3                         |
| KCTD11   | 0.697791 | 2.01E-05 | 0.000792 | 4.263333 | Up | potassium channel tetramerization domain containing 11  |
| HSP90AA1 | 0.696743 | 0.00019  | 0.00406  | 3.731557 | Up | heat shock protein 90 alpha family class A member 1     |
| BTG1     | 0.694132 | 4.22E-06 | 0.000257 | 4.600208 | Up | BTG anti-proliferation factor 1                         |
| GALM     | 0.693238 | 0.005154 | 0.040486 | 2.797233 | Up | galactosemutarotase                                     |
| GAB1     | 0.693194 | 1.58E-08 | 3.21E-06 | 5.652613 | Up | GRB2 associated binding protein 1                       |
| PXMP2    | 0.692523 | 0.001283 | 0.015424 | 3.21973  | Up | peroxisomal membrane protein 2                          |
| SCARNA17 | 0.691261 | 8.34E-06 | 0.000432 | 4.456247 | Up | small Cajal body-specific RNA 17                        |
| S1PR1    | 0.691074 | 6.64E-05 | 0.001855 | 3.988707 | Up | sphingosine-1-phosphate receptor 1                      |
| THRB     | 0.691029 | 0.000885 | 0.011987 | 3.324668 | Up | thyroid hormone receptor beta                           |
| RPL39    | 0.690209 | 0.005561 | 0.042488 | 2.77258  | Up | ribosomal protein L39                                   |
| UTP14A   | 0.6899   | 0.003424 | 0.030472 | 2.926834 | Up | UTP14A small subunit processome component               |
| EDNRB    | 0.689734 | 0.000237 | 0.004752 | 3.6754   | Up | endothelin receptor type B                              |
| CRTC3    | 0.689519 | 8.27E-05 | 0.002191 | 3.936548 | Up | CREB regulated transcription coactivator 3              |
| AK1      | 0.689426 | 0.001162 | 0.014574 | 3.248124 | Up | adenylate kinase 1                                      |
| PTGER3   | 0.687494 | 0.001956 | 0.020638 | 3.09677  | Up | prostaglandin E receptor 3                              |
| SYBU     | 0.687308 | 0.000239 | 0.004773 | 3.674039 | Up | syntabulin                                              |
| MED25    | 0.687197 | 0.002406 | 0.023989 | 3.034873 | Up | mediator complex subunit 25                             |
| ERP29    | 0.686161 | 0.000267 | 0.005139 | 3.645521 | Up | endoplasmic reticulum protein 29                        |
| RBM23    | 0.685812 | 0.000216 | 0.004436 | 3.699217 | Up | RNA binding motif protein 23                            |
| GPATCH4  | 0.684195 | 0.001189 | 0.014747 | 3.241437 | Up | G-patch domain containing 4                             |
| CDNF     | 0.684189 | 0.001318 | 0.015708 | 3.212028 | Up | cerebral dopamine neurotrophic factor                   |
| RNASEK   | 0.683852 | 0.005382 | 0.041449 | 2.783259 | Up | ribonuclease K                                          |
| LPCAT3   | 0.683539 | 0.000328 | 0.005946 | 3.591945 | Up | lysophosphatidylcholineacyltransferase 3                |
| CASC3    | 0.683245 | 0.000342 | 0.006117 | 3.581073 | Up | CASC3 exon junction complex subunit                     |
| MTMR3    | 0.682235 | 0.000873 | 0.01186  | 3.328634 | Up | myotubularin related protein 3                          |
| TNKS     | 0.681959 | 0.000955 | 0.012674 | 3.303437 | Up | tankyrase                                               |
| SF3A1    | 0.681792 | 0.000107 | 0.002666 | 3.87484  | Up | splicing factor 3a subunit 1                            |

|          |          |          |          |          |    |                                                                   |
|----------|----------|----------|----------|----------|----|-------------------------------------------------------------------|
| CHID1    | 0.681692 | 2.35E-05 | 0.000888 | 4.228751 | Up | chitinase domain containing 1                                     |
| AGPAT3   | 0.679929 | 4.02E-06 | 0.000249 | 4.610538 | Up | 1-acylglycerol-3-phosphate O-acyltransferase 3                    |
| ADPRHL1  | 0.67793  | 0.003299 | 0.029823 | 2.93839  | Up | ADP-ribosylhydrolase like 1                                       |
| MEX3C    | 0.676707 | 1.74E-07 | 2.28E-05 | 5.225485 | Up | mex-3 RNA binding family member C                                 |
| SIAH2    | 0.676628 | 4.59E-05 | 0.001437 | 4.075423 | Up | siah E3 ubiquitin protein ligase 2                                |
| ACD      | 0.674822 | 0.000397 | 0.006739 | 3.541993 | Up | ACD shelterin complex subunit and telomerase recruitment factor   |
| NFKBIA   | 0.671989 | 2.49E-09 | 7.07E-07 | 5.961923 | Up | NFKB inhibitor alpha                                              |
| CDC42EP4 | 0.670577 | 3.53E-05 | 0.001193 | 4.136046 | Up | CDC42 effector protein 4                                          |
| ARHGAP17 | 0.670458 | 0.000353 | 0.006238 | 3.572609 | Up | Rho GTPase activating protein 17                                  |
| GJA1     | 0.669532 | 0.000191 | 0.004071 | 3.730543 | Up | gap junction protein alpha 1                                      |
| RNPS1    | 0.669286 | 0.000469 | 0.007577 | 3.498063 | Up | RNA binding protein with serine rich domain 1                     |
| ATP13A2  | 0.668974 | 0.001969 | 0.020738 | 3.094808 | Up | ATPase cation transporting 13A2                                   |
| ZSWIM3   | 0.666665 | 0.005783 | 0.043574 | 2.759838 | Up | zinc finger SWIM-type containing 3                                |
| TXNDC5   | 0.666561 | 6.22E-05 | 0.001775 | 4.004346 | Up | thioredoxin domain containing 5                                   |
| PPFIBP2  | 0.66328  | 0.00471  | 0.038127 | 2.826221 | Up | PPFIA binding protein 2                                           |
| MRPL49   | 0.661083 | 4.76E-05 | 0.001473 | 4.066891 | Up | mitochondrial ribosomal protein L49                               |
| SLC35C2  | 0.660269 | 0.002623 | 0.025458 | 3.008774 | Up | solute carrier family 35 member C2                                |
| CD34     | 0.656903 | 0.001941 | 0.020527 | 3.099122 | Up | CD34 molecule                                                     |
| SQSTM1   | 0.656832 | 0.000903 | 0.012146 | 3.319117 | Up | sequestosome 1                                                    |
| DEAF1    | 0.656044 | 0.000482 | 0.007723 | 3.490807 | Up | DEAF1 transcription factor                                        |
| CPNE8    | 0.655935 | 0.006745 | 0.048175 | 2.709168 | Up | copine 8                                                          |
| INSR     | 0.655878 | 0.001522 | 0.017355 | 3.170368 | Up | insulin receptor                                                  |
| RPL19    | 0.655743 | 0.0001   | 0.002543 | 3.889412 | Up | ribosomal protein L19                                             |
| NR1D2    | 0.655727 | 0.001279 | 0.015407 | 3.220621 | Up | nuclear receptor subfamily 1 group D member 2                     |
| SLC25A43 | 0.655559 | 0.000873 | 0.01186  | 3.32843  | Up | solute carrier family 25 member 43                                |
| AGBL5    | 0.654572 | 0.003824 | 0.032915 | 2.892293 | Up | ATP/GTP binding protein like 5                                    |
| SLC39A4  | 0.653952 | 0.005292 | 0.041019 | 2.788697 | Up | solute carrier family 39 member 4                                 |
| SP2      | 0.652169 | 0.002758 | 0.026271 | 2.993532 | Up | Sp2 transcription factor                                          |
| SLC2A4RG | 0.65117  | 0.00165  | 0.018241 | 3.146991 | Up | SLC2A4 regulator                                                  |
| YIPF3    | 0.650173 | 3.26E-05 | 0.001131 | 4.15422  | Up | Yip1 domain family member 3                                       |
| MRPS18B  | 0.649811 | 7.15E-06 | 0.000383 | 4.489106 | Up | mitochondrial ribosomal protein S18B                              |
| NEDD9    | 0.648825 | 0.000492 | 0.007837 | 3.485031 | Up | neural precursor cell expressed, developmentally down-regulated 9 |
| GADD45G  | 0.648736 | 0.006811 | 0.048569 | 2.705943 | Up | growth arrest and DNA damage inducible gamma                      |
| ZNRF3    | 0.648723 | 0.001296 | 0.015533 | 3.216764 | Up | zinc and ring finger 3                                            |
| MAST3    | 0.648387 | 0.001533 | 0.017433 | 3.168306 | Up | microtubule associated serine/threonine kinase 3                  |
| SNX12    | 0.648357 | 0.001185 | 0.014729 | 3.242554 | Up | sorting nexin 12                                                  |
| TMED5    | 0.647804 | 4.52E-05 | 0.001421 | 4.079333 | Up | transmembrane p24 trafficking protein 5                           |
| BAZ2A    | 0.647031 | 0.000218 | 0.004449 | 3.69755  | Up | bromodomain adjacent to zinc finger domain 2A                     |
| CCDC86   | 0.646936 | 0.000592 | 0.008966 | 3.435136 | Up | coiled-coil domain containing 86                                  |
| MBOAT7   | 0.644983 | 0.005086 | 0.040095 | 2.801514 | Up | membrane bound O-acyltransferase domain containing 7              |
| GID8     | 0.644926 | 0.00015  | 0.003436 | 3.790262 | Up | GID complex subunit 8 homolog                                     |
| DCPS     | 0.642919 | 0.002036 | 0.021241 | 3.084943 | Up | decapping enzyme, scavenger                                       |
| LIG3     | 0.642442 | 5.43E-05 | 0.001633 | 4.036185 | Up | DNA ligase 3                                                      |



|              |          |          |          |          |      |                                                                          |
|--------------|----------|----------|----------|----------|------|--------------------------------------------------------------------------|
| BSG          | 0.641779 | 0.001141 | 0.014369 | 3.253151 | Up   | basigin (Ok blood group)                                                 |
| SP4          | 0.640664 | 0.000992 | 0.012988 | 3.292727 | Up   | Sp4 transcription factor                                                 |
| KLF11        | 0.63968  | 1.52E-05 | 0.000659 | 4.325257 | Up   | Kruppel like factor 11                                                   |
| CIZ1         | 0.63856  | 1.87E-05 | 0.000756 | 4.279502 | Up   | CDKN1A interacting zinc finger protein 1                                 |
| LNX1         | 0.636517 | 1.47E-05 | 0.000641 | 4.333615 | Up   | ligand of numb-protein X 1                                               |
| RALB         | 0.63579  | 3.37E-06 | 0.000219 | 4.646621 | Up   | RAS like proto-oncogene B                                                |
| BTF3         | 0.632977 | 0.000199 | 0.004195 | 3.720016 | Up   | basic transcription factor 3                                             |
| ZNF836       | 0.632392 | 0.002077 | 0.021526 | 3.078926 | Up   | zinc finger protein 836                                                  |
| NET1         | 0.631653 | 0.005749 | 0.043387 | 2.761785 | Up   | neuroepithelial cell transforming 1                                      |
| IAPP         | -10.801  | 2.63E-45 | 2.38E-41 | -14.126  | Down | islet amyloid polypeptide                                                |
| INS          | -10.3513 | 7.60E-52 | 1.37E-47 | -15.1498 | Down | insulin                                                                  |
| HAPLN4       | -6.9522  | 3.78E-09 | 1.00E-06 | -5.89366 | Down | hyaluronan and proteoglycan link protein 4                               |
| ADCYAP1      | -6.37952 | 7.01E-16 | 1.81E-12 | -8.07029 | Down | adenylatecyclase activating polypeptide 1                                |
| CSNK1G1      | -6.37349 | 5.07E-14 | 8.34E-11 | -7.53001 | Down | casein kinase 1 gamma 1                                                  |
| MAFA         | -6.08612 | 2.10E-12 | 1.90E-09 | -7.02742 | Down | MAF bZIP transcription factor A                                          |
| IGLL5        | -5.95682 | 0.00111  | 0.014081 | -3.26108 | Down | immunoglobulin lambda like polypeptide 5                                 |
| WSCD2        | -5.89111 | 1.55E-09 | 5.04E-07 | -6.03927 | Down | WSC domain containing 2                                                  |
| PLCH2        | -5.70065 | 1.54E-15 | 3.49E-12 | -7.9734  | Down | phospholipase C eta 2                                                    |
| SLCO1A2      | -5.65472 | 9.18E-05 | 0.002377 | -3.9112  | Down | solute carrier organic anion transporter family member 1A2               |
| HHATL        | -5.54001 | 4.92E-11 | 3.23E-08 | -6.57335 | Down | hedgehog acyltransferase like                                            |
| DMBT1        | -5.11154 | 0.000502 | 0.007945 | -3.47993 | Down | deleted in malignant brain tumors 1                                      |
| RGS16        | -4.81121 | 1.53E-18 | 9.23E-15 | -8.78743 | Down | regulator of G protein signaling 16                                      |
| PREX1        | -4.79312 | 5.00E-11 | 3.23E-08 | -6.57103 | Down | phosphatidylinositol-3,4,5-trisphosphate dependent Rac exchange factor 1 |
| SYT16        | -4.64825 | 1.25E-08 | 2.80E-06 | -5.69211 | Down | synaptotagmin 16                                                         |
| ASB9         | -4.60995 | 1.08E-17 | 3.26E-14 | -8.56492 | Down | ankyrin repeat and SOCS box containing 9                                 |
| LRFN2        | -4.54487 | 1.77E-05 | 0.000726 | -4.29175 | Down | leucine rich repeat and fibronectin type III domain containing 2         |
| NRG3         | -4.53264 | 3.24E-05 | 0.001126 | -4.15624 | Down | neuregulin 3                                                             |
| HSD17B13     | -4.51785 | 1.90E-09 | 5.93E-07 | -6.00595 | Down | hydroxysteroid 17-beta dehydrogenase 13                                  |
| DLK1         | -4.43907 | 2.20E-12 | 1.90E-09 | -7.02104 | Down | delta like non-canonical Notch ligand 1                                  |
| LOC100286922 | -4.09518 | 0.00035  | 0.00622  | -3.57543 | Down | DnaJ heat shock protein family (Hsp40) member B3 pseudogene              |
| LRRTM3       | -4.05763 | 3.63E-06 | 0.00023  | -4.63163 | Down | leucine rich repeat transmembrane neuronal 3                             |
| GABRA2       | -3.9965  | 1.21E-06 | 0.000101 | -4.85468 | Down | gamma-aminobutyric acid type A receptor subunit alpha2                   |
| GTSE1        | -3.96587 | 8.59E-06 | 0.00044  | -4.44996 | Down | gametocyte specific factor 1                                             |
| NTNG2        | -3.89902 | 1.78E-07 | 2.30E-05 | -5.22131 | Down | netrin G2                                                                |
| GLRA1        | -3.83003 | 4.47E-05 | 0.001413 | -4.08161 | Down | glycine receptor alpha 1                                                 |
| DGKG         | -3.7646  | 8.17E-13 | 9.53E-10 | -7.15833 | Down | diacylglycerol kinase gamma                                              |
| ISX          | -3.75152 | 0.001191 | 0.014761 | -3.24097 | Down | intestine specific homeobox                                              |
| OR10J3       | -3.70449 | 1.79E-06 | 0.000139 | -4.77542 | Down | olfactory receptor family 10 subfamily J member 3                        |
| SLC6A17      | -3.70444 | 1.83E-05 | 0.00074  | -4.28474 | Down | solute carrier family 6 member 17                                        |
| DACH2        | -3.67639 | 4.10E-08 | 6.95E-06 | -5.48656 | Down | dachshund family transcription factor 2                                  |
| VPREB1       | -3.6609  | 0.001658 | 0.018315 | -3.14545 | Down | V-set pre-B cell surrogate light chain 1                                 |
| RXRG         | -3.64353 | 3.01E-06 | 0.000204 | -4.67042 | Down | retinoid X receptor gamma                                                |
| IFNA16       | -3.63676 | 0.00089  | 0.012039 | -3.32325 | Down | interferon alpha 16                                                      |

|           |          |          |          |          |      |                                                               |
|-----------|----------|----------|----------|----------|------|---------------------------------------------------------------|
| G6PC2     | -3.62269 | 3.42E-06 | 0.00022  | -4.64385 | Down | glucose-6-phosphatase catalytic subunit 2                     |
| OR4F5     | -3.59416 | 0.001252 | 0.015226 | -3.22678 | Down | olfactory receptor family 4 subfamily F member 5              |
| SLC18A2   | -3.57954 | 7.56E-09 | 1.80E-06 | -5.77806 | Down | solute carrier family 18 member A2                            |
| BIRC8     | -3.56786 | 5.34E-05 | 0.001609 | -4.04035 | Down | baculoviral IAP repeat containing 8                           |
| KLHL1     | -3.55633 | 6.13E-05 | 0.001753 | -4.00789 | Down | kelch like family member 1                                    |
| SLC26A9   | -3.53742 | 0.000256 | 0.005002 | -3.65613 | Down | solute carrier family 26 member 9                             |
| OR6C74    | -3.52371 | 0.000373 | 0.006457 | -3.55827 | Down | olfactory receptor family 6 subfamily C member 74             |
| DKK4      | -3.51465 | 3.70E-05 | 0.001229 | -4.12522 | Down | dickkopf WNT signaling pathway inhibitor 4                    |
| UNC5A     | -3.5005  | 3.25E-06 | 0.000214 | -4.65467 | Down | unc-5 netrin receptor A                                       |
| OR5L1     | -3.49176 | 0.000203 | 0.004248 | -3.71483 | Down | olfactory receptor family 5 subfamily L member 1              |
| LOC154761 | -3.48046 | 1.69E-05 | 0.000707 | -4.30203 | Down | family with sequence similarity 115, member C pseudogene      |
| OR4D2     | -3.47937 | 0.001687 | 0.018539 | -3.14047 | Down | olfactory receptor family 4 subfamily D member 2              |
| KCNG3     | -3.45067 | 5.90E-07 | 5.87E-05 | -4.99431 | Down | potassium voltage-gated channel modifier subfamily G member 3 |
| ARHGEF35  | -3.42973 | 0.00378  | 0.032645 | -2.89592 | Down | Rho guanine nucleotide exchange factor 35                     |
| SLC27A6   | -3.42698 | 0.00025  | 0.004903 | -3.66238 | Down | solute carrier family 27 member 6                             |
| OR2T33    | -3.40998 | 0.000418 | 0.007022 | -3.52868 | Down | olfactory receptor family 2 subfamily T member 33             |
| KIF4B     | -3.39216 | 0.000503 | 0.00795  | -3.47931 | Down | kinesin family member 4B                                      |
| CLDN25    | -3.35937 | 0.000658 | 0.009732 | -3.40632 | Down | claudin 25                                                    |
| OR2T6     | -3.33501 | 0.000203 | 0.004248 | -3.71558 | Down | olfactory receptor family 2 subfamily T member 6              |
| EBLN1     | -3.32606 | 0.000711 | 0.010271 | -3.38516 | Down | endogenous Bornavirus like nucleoprotein 1                    |
| TKTL2     | -3.32283 | 0.000899 | 0.012131 | -3.32029 | Down | transketolase like 2                                          |
| ST8SIA5   | -3.29995 | 9.50E-05 | 0.002441 | -3.90304 | Down | ST8 alpha-N-acetyl-neuraminide alpha-2,8-sialyltransferase 5  |
| ADAM30    | -3.29013 | 0.003501 | 0.030982 | -2.91998 | Down | ADAM metallopeptidase domain 30                               |
| CDHR1     | -3.24111 | 0.000721 | 0.010362 | -3.38165 | Down | cadherin related family member 1                              |
| GJA10     | -3.22733 | 0.000173 | 0.003765 | -3.75491 | Down | gap junction protein alpha 10                                 |
| CYP3A43   | -3.20066 | 3.99E-05 | 0.001294 | -4.10804 | Down | cytochrome P450 family 3 subfamily A member 43                |
| BMP5      | -3.18774 | 4.18E-06 | 0.000255 | -4.60225 | Down | bone morphogenetic protein 5                                  |
| PRUNE2    | -3.17519 | 1.38E-09 | 4.71E-07 | -6.05767 | Down | prune homolog 2 with BCH domain                               |
| LINC00602 | -3.17107 | 0.000318 | 0.005801 | -3.60012 | Down | long intergenic non-protein coding RNA 602                    |
| RASD1     | -3.16012 | 1.06E-09 | 3.74E-07 | -6.10078 | Down | ras related dexamethasone induced 1                           |
| TAAR9     | -3.13989 | 0.003702 | 0.032231 | -2.90248 | Down | trace amine associated receptor 9                             |
| OR8H2     | -3.12734 | 0.000427 | 0.007125 | -3.5231  | Down | olfactory receptor family 8 subfamily H member 2              |
| INSRR     | -3.11972 | 0.005572 | 0.042533 | -2.77196 | Down | insulin receptor related receptor                             |
| POSTN     | -3.11052 | 1.26E-07 | 1.75E-05 | -5.28454 | Down | periostin                                                     |
| OR4N2     | -3.09015 | 0.00604  | 0.044854 | -2.74562 | Down | olfactory receptor family 4 subfamily N member 2              |
| CASQ2     | -3.08655 | 0.001058 | 0.013583 | -3.27466 | Down | calsequestrin 2                                               |
| LOC441204 | -3.08411 | 7.24E-05 | 0.001987 | -3.96836 | Down | uncharacterized LOC441204                                     |
| OR2A25    | -3.08173 | 0.000264 | 0.005116 | -3.64842 | Down | olfactory receptor family 2 subfamily A member 25             |
| OR5E1P    | -3.0489  | 0.001755 | 0.019094 | -3.12882 | Down | olfactory receptor family 5 subfamily E member 1 pseudogene   |
| LY6G6E    | -3.04857 | 0.001493 | 0.017122 | -3.17595 | Down | lymphocyte antigen 6 family member G6E                        |
| SSTR5-AS1 | -3.0425  | 8.27E-07 | 7.44E-05 | -4.92887 | Down | SSTR5 antisense RNA 1                                         |
| CYP24A1   | -3.03607 | 0.002253 | 0.022897 | -3.0547  | Down | cytochrome P450 family 24 subfamily A member 1                |
| TAS2R7    | -3.02863 | 0.000145 | 0.003362 | -3.79889 | Down | taste 2 receptor member 7                                     |

|            |          |          |          |          |      |                                                                      |
|------------|----------|----------|----------|----------|------|----------------------------------------------------------------------|
| SLC8A1-AS1 | -3.02422 | 0.000815 | 0.011262 | -3.34768 | Down | SLC8A1 antisense RNA 1                                               |
| ZNF385D    | -3.02118 | 7.51E-07 | 6.88E-05 | -4.94777 | Down | zinc finger protein 385D                                             |
| LINC00460  | -3.01407 | 0.001244 | 0.015147 | -3.22856 | Down | long intergenic non-protein coding RNA 460                           |
| KIF20A     | -3.01006 | 0.000681 | 0.009971 | -3.39723 | Down | kinesin family member 20A                                            |
| HLA-DQA1   | -3.00395 | 1.85E-08 | 3.64E-06 | -5.6257  | Down | major histocompatibility complex, class II, DQ alpha 1               |
| ASB5       | -3.00067 | 0.000216 | 0.004436 | -3.69951 | Down | ankyrin repeat and SOCS box containing 5                             |
| OR1E2      | -2.99957 | 0.001083 | 0.013816 | -3.26804 | Down | olfactory receptor family 1 subfamily E member 2                     |
| TNFAIP8    | -2.99257 | 8.45E-15 | 1.70E-11 | -7.7607  | Down | TNF alpha induced protein 8                                          |
| OR2B3      | -2.98546 | 0.000293 | 0.005479 | -3.62108 | Down | olfactory receptor family 2 subfamily B member 3                     |
| SLC45A3    | -2.97833 | 4.34E-05 | 0.001375 | -4.08865 | Down | solute carrier family 45 member 3                                    |
| IFNA10     | -2.97627 | 0.000425 | 0.007112 | -3.52402 | Down | interferon alpha 10                                                  |
| VWA5B1     | -2.95932 | 0.001384 | 0.016227 | -3.19796 | Down | von Willebrand factor A domain containing 5B1                        |
| USP26      | -2.95706 | 0.002713 | 0.026028 | -2.99855 | Down | ubiquitin specific peptidase 26                                      |
| TM6SF2     | -2.95528 | 2.99E-08 | 5.40E-06 | -5.54201 | Down | transmembrane 6 superfamily member 2                                 |
| PPM1E      | -2.94698 | 8.01E-06 | 0.000417 | -4.46499 | Down | protein phosphatase, Mg <sup>2+</sup> /Mn <sup>2+</sup> dependent 1E |
| FOXM1      | -2.94119 | 0.003185 | 0.029075 | -2.94926 | Down | forkhead box M1                                                      |
| TPX2       | -2.93595 | 0.000949 | 0.012618 | -3.30526 | Down | TPX2 microtubule nucleation factor                                   |
| LRRRC10    | -2.93393 | 0.002164 | 0.022223 | -3.06669 | Down | leucine rich repeat containing 10                                    |
| GREM2      | -2.92963 | 0.002908 | 0.027299 | -2.97732 | Down | gremlin 2, DAN family BMP antagonist                                 |
| OR6N1      | -2.92321 | 0.00263  | 0.025499 | -3.00796 | Down | olfactory receptor family 6 subfamily N member 1                     |
| EIF3IP1    | -2.92189 | 0.003394 | 0.030322 | -2.92956 | Down | eukaryotic translation initiation factor 3 subunit I pseudogene 1    |
| CAPN8      | -2.91404 | 0.000476 | 0.007661 | -3.49417 | Down | calpain 8                                                            |
| GOLGA8CP   | -2.90644 | 0.006607 | 0.047649 | -2.71601 | Down | golgin A8 family member C, pseudogene                                |
| TFF3       | -2.89791 | 8.85E-06 | 0.000445 | -4.44363 | Down | trefoil factor 3                                                     |
| OR4K5      | -2.89759 | 0.000785 | 0.011002 | -3.35799 | Down | olfactory receptor family 4 subfamily K member 5                     |
| HOPX       | -2.89043 | 5.18E-06 | 0.000306 | -4.55731 | Down | HOP homeobox                                                         |
| MTRNR2L5   | -2.88837 | 0.000627 | 0.009365 | -3.41948 | Down | MT-RNR2 like 5                                                       |
| COMP       | -2.88387 | 9.00E-07 | 7.98E-05 | -4.9123  | Down | cartilage oligomeric matrix protein                                  |
| OR4A5      | -2.88266 | 0.000521 | 0.008166 | -3.46976 | Down | olfactory receptor family 4 subfamily A member 5                     |
| SULT1C2P1  | -2.87268 | 0.000168 | 0.003688 | -3.76253 | Down | sulfotransferase family 1C member 2 pseudogene 1                     |
| OR5AN1     | -2.86497 | 0.005374 | 0.041436 | -2.78374 | Down | olfactory receptor family 5 subfamily AN member 1                    |
| KRTAP1-3   | -2.86473 | 0.002933 | 0.027411 | -2.97471 | Down | keratin associated protein 1-3                                       |
| OR5AS1     | -2.8631  | 0.00075  | 0.010703 | -3.37055 | Down | olfactory receptor family 5 subfamily AS member 1                    |
| GABRR2     | -2.85852 | 0.001493 | 0.017122 | -3.17608 | Down | gamma-aminobutyric acid type A receptor subunit rho2                 |
| OR13G1     | -2.85436 | 0.005275 | 0.040973 | -2.78976 | Down | olfactory receptor family 13 subfamily G member 1                    |
| OR2M5      | -2.8505  | 0.001514 | 0.017284 | -3.17193 | Down | olfactory receptor family 2 subfamily M member 5                     |
| HTR3A      | -2.82474 | 0.000642 | 0.009519 | -3.41324 | Down | 5-hydroxytryptamine receptor 3A                                      |
| KRTAP13-3  | -2.82267 | 0.002954 | 0.027543 | -2.97253 | Down | keratin associated protein 13-3                                      |
| OR13C5     | -2.82057 | 7.98E-05 | 0.00213  | -3.9449  | Down | olfactory receptor family 13 subfamily C member 5                    |
| OR4C3      | -2.80788 | 0.005491 | 0.042035 | -2.77675 | Down | olfactory receptor family 4 subfamily C member 3                     |
| PPIEL      | -2.78532 | 4.64E-05 | 0.001444 | -4.07319 | Down | peptidylprolyl isomerase E like pseudogene                           |
| ASB11      | -2.78468 | 0.000245 | 0.004837 | -3.66753 | Down | ankyrin repeat and SOCS box containing 11                            |
| CHST8      | -2.78461 | 1.89E-05 | 0.00076  | -4.27789 | Down | carbohydrate sulfotransferase 8                                      |

|              |          |          |          |          |      |                                                             |
|--------------|----------|----------|----------|----------|------|-------------------------------------------------------------|
| GOLGA6L1     | -2.7816  | 0.000171 | 0.003726 | -3.75848 | Down | golgin A6 family like 1                                     |
| MAS1         | -2.77551 | 0.00044  | 0.007269 | -3.51512 | Down | MAS1 proto-oncogene, G protein-coupled receptor             |
| OR52L1       | -2.76744 | 8.16E-05 | 0.002168 | -3.93961 | Down | olfactory receptor family 52 subfamily L member 1           |
| PBK          | -2.76743 | 0.000196 | 0.004138 | -3.72403 | Down | PDZ binding kinase                                          |
| ANXA2P3      | -2.76623 | 0.001772 | 0.019268 | -3.12596 | Down | annexin A2 pseudogene 3                                     |
| KRTAP4-2     | -2.7586  | 0.001037 | 0.013422 | -3.28017 | Down | keratin associated protein 4-2                              |
| OR8K1        | -2.75811 | 0.002112 | 0.021778 | -3.07408 | Down | olfactory receptor family 8 subfamily K member 1            |
| TCN1         | -2.75785 | 0.002731 | 0.026128 | -2.99649 | Down | transcobalamin 1                                            |
| KIRREL3      | -2.75601 | 0.000505 | 0.007982 | -3.47799 | Down | kirre like nephrin family adhesion molecule 3               |
| OR6B2        | -2.7546  | 0.003595 | 0.031565 | -2.91164 | Down | olfactory receptor family 6 subfamily B member 2            |
| KRTAP19-1    | -2.738   | 0.000419 | 0.007044 | -3.52758 | Down | keratin associated protein 19-1                             |
| KRTAP3-1     | -2.73476 | 0.006721 | 0.048118 | -2.71035 | Down | keratin associated protein 3-1                              |
| SLCO5A1      | -2.7339  | 0.000151 | 0.003436 | -3.78966 | Down | solute carrier organic anion transporter family member 5A1  |
| IFNA1        | -2.71621 | 0.003812 | 0.032859 | -2.89328 | Down | interferon alpha 1                                          |
| KRTAP3-2     | -2.71406 | 0.003974 | 0.033866 | -2.8802  | Down | keratin associated protein 3-2                              |
| VENTXP7      | -2.70781 | 0.000793 | 0.011058 | -3.35508 | Down | VENT homeoboxpseudogene 7                                   |
| LOC341056    | -2.70401 | 0.004623 | 0.037645 | -2.83218 | Down | SUMO1 activating enzyme subunit 1 pseudogene                |
| KRTAP9-9     | -2.69101 | 0.005252 | 0.040848 | -2.79118 | Down | keratin associated protein 9-9                              |
| OR56A4       | -2.68936 | 0.002123 | 0.021887 | -3.07243 | Down | olfactory receptor family 56 subfamily A member 4           |
| FAM111B      | -2.68489 | 0.000288 | 0.005416 | -3.62612 | Down | family with sequence similarity 111 member B                |
| PSMA6        | -2.68174 | 3.99E-18 | 1.80E-14 | -8.67908 | Down | proteasome 20S subunit alpha 6                              |
| DLGAP5       | -2.68048 | 0.001477 | 0.017037 | -3.17907 | Down | DLG associated protein 5                                    |
| PFKFB2       | -2.67874 | 2.19E-10 | 9.91E-08 | -6.34724 | Down | 6-phosphofructo-2-kinase/fructose-2,6-biphosphatase 2       |
| OR5B17       | -2.67817 | 0.00413  | 0.034912 | -2.86807 | Down | olfactory receptor family 5 subfamily B member 17           |
| LOC100287036 | -2.66753 | 0.003578 | 0.031512 | -2.91317 | Down | uncharacterized LOC100287036                                |
| PCDH7        | -2.66116 | 6.16E-07 | 6.09E-05 | -4.98602 | Down | protocadherin 7                                             |
| MND1         | -2.65071 | 2.22E-08 | 4.27E-06 | -5.59402 | Down | meiotic nuclear divisions 1                                 |
| RCAN2        | -2.60302 | 0.001595 | 0.01787  | -3.15677 | Down | regulator of calcineurin 2                                  |
| TMEM108      | -2.59295 | 5.48E-05 | 0.001641 | -4.03417 | Down | transmembrane protein 108                                   |
| OR51A2       | -2.58736 | 0.004723 | 0.038181 | -2.82532 | Down | olfactory receptor family 51 subfamily A member 2           |
| P2RX5        | -2.58657 | 0.000125 | 0.003005 | -3.8356  | Down | purinergic receptor P2X 5                                   |
| SLC22A9      | -2.58464 | 0.00124  | 0.01511  | -3.22949 | Down | solute carrier family 22 member 9                           |
| OR5T1        | -2.57736 | 0.003632 | 0.031742 | -2.90848 | Down | olfactory receptor family 5 subfamily T member 1            |
| OR1A1        | -2.57723 | 0.002728 | 0.026111 | -2.99685 | Down | olfactory receptor family 1 subfamily A member 1            |
| OR13C8       | -2.57325 | 0.001945 | 0.020542 | -3.09849 | Down | olfactory receptor family 13 subfamily C member 8           |
| OR13C2       | -2.57298 | 0.005077 | 0.040061 | -2.80213 | Down | olfactory receptor family 13 subfamily C member 2           |
| GAP43        | -2.57224 | 0.001777 | 0.019296 | -3.12518 | Down | growth associated protein 43                                |
| MFAP5        | -2.56407 | 0.000759 | 0.010785 | -3.36736 | Down | microfibril associated protein 5                            |
| SGPP2        | -2.55582 | 2.11E-05 | 0.00082  | -4.25256 | Down | sphingosine-1-phosphate phosphatase 2                       |
| ADAMTSL1     | -2.55426 | 1.36E-07 | 1.87E-05 | -5.27081 | Down | ADAMTS like 1                                               |
| OR2L1P       | -2.55171 | 0.000488 | 0.007806 | -3.48701 | Down | olfactory receptor family 2 subfamily L member 1 pseudogene |
| TPD52L3      | -2.55159 | 0.001889 | 0.020166 | -3.10709 | Down | TPD52 like 3                                                |
| PABPC1L2A    | -2.55147 | 0.006252 | 0.045885 | -2.73428 | Down | poly(A) binding protein cytoplasmic 1 like 2A               |

|              |          |          |          |          |      |                                                               |
|--------------|----------|----------|----------|----------|------|---------------------------------------------------------------|
| OR51B4       | -2.54936 | 0.001501 | 0.017188 | -3.17446 | Down | olfactory receptor family 51 subfamily B member 4             |
| LCE1F        | -2.54374 | 0.002888 | 0.027195 | -2.97945 | Down | late cornified envelope 1F                                    |
| KCNQ2        | -2.52303 | 0.001454 | 0.016864 | -3.18366 | Down | potassium voltage-gated channel subfamily Q member 2          |
| SFRP4        | -2.52066 | 1.03E-08 | 2.36E-06 | -5.72526 | Down | secreted frizzled related protein 4                           |
| KCNF1        | -2.51814 | 0.000113 | 0.002775 | -3.86075 | Down | potassium voltage-gated channel modifier subfamily F member 1 |
| OR2AG2       | -2.51736 | 0.004873 | 0.038957 | -2.8153  | Down | olfactory receptor family 2 subfamily AG member 2             |
| CD1E         | -2.51051 | 0.002538 | 0.024876 | -3.01877 | Down | CD1e molecule                                                 |
| OR2M7        | -2.50383 | 0.004156 | 0.03502  | -2.86606 | Down | olfactory receptor family 2 subfamily M member 7              |
| OR51L1       | -2.49986 | 0.001702 | 0.018656 | -3.13791 | Down | olfactory receptor family 51 subfamily L member 1             |
| LINC00477    | -2.49804 | 0.004433 | 0.036513 | -2.8456  | Down | long intergenic non-protein coding RNA 477                    |
| OR5H1        | -2.49529 | 0.0037   | 0.032227 | -2.90267 | Down | olfactory receptor family 5 subfamily H member 1              |
| FAM83E       | -2.49154 | 0.000801 | 0.01113  | -3.35243 | Down | family with sequence similarity 83 member E                   |
| CRLF1        | -2.48748 | 1.68E-12 | 1.60E-09 | -7.05875 | Down | cytokine receptor like factor 1                               |
| STAG3        | -2.48528 | 0.002489 | 0.024577 | -3.0247  | Down | stromal antigen 3                                             |
| KRTAP21-2    | -2.47732 | 0.001534 | 0.017433 | -3.16815 | Down | keratin associated protein 21-2                               |
| OR8G1        | -2.4672  | 0.005221 | 0.04074  | -2.79305 | Down | olfactory receptor family 8 subfamily G member 1              |
| OR6K6        | -2.46634 | 0.006059 | 0.044944 | -2.74455 | Down | olfactory receptor family 6 subfamily K member 6              |
| KRTAP19-2    | -2.4657  | 0.003103 | 0.028539 | -2.95735 | Down | keratin associated protein 19-2                               |
| OR10Z1       | -2.45396 | 0.003252 | 0.029509 | -2.94285 | Down | olfactory receptor family 10 subfamily Z member 1             |
| KRTAP10-1    | -2.45298 | 0.006735 | 0.048175 | -2.70969 | Down | keratin associated protein 10-1                               |
| DNAH11       | -2.45203 | 0.000344 | 0.006141 | -3.57944 | Down | dynein axonemal heavy chain 11                                |
| NPTX2        | -2.44884 | 1.08E-10 | 5.76E-08 | -6.455   | Down | neuronal pentraxin 2                                          |
| KCNH1        | -2.44466 | 0.001977 | 0.020792 | -3.0937  | Down | potassium voltage-gated channel subfamily H member 1          |
| OR4K1        | -2.43709 | 0.004239 | 0.035455 | -2.85982 | Down | olfactory receptor family 4 subfamily K member 1              |
| OR5T2        | -2.43076 | 0.002914 | 0.027332 | -2.97665 | Down | olfactory receptor family 5 subfamily T member 2              |
| PSMD6-AS2    | -2.42892 | 0.000265 | 0.005132 | -3.64722 | Down | PSMD6 antisense RNA 2                                         |
| EDARADD      | -2.4128  | 9.72E-06 | 0.000474 | -4.42333 | Down | EDAR associated death domain                                  |
| SDR16C5      | -2.41156 | 0.00454  | 0.037128 | -2.838   | Down | short chain dehydrogenase/reductase family 16C member 5       |
| LOC100130673 | -2.41083 | 0.004883 | 0.03897  | -2.81463 | Down | phosphoribosyl pyrophosphate synthetase 2 pseudogene          |
| PII6         | -2.40562 | 0.000421 | 0.007072 | -3.52631 | Down | peptidase inhibitor 16                                        |
| JPH2         | -2.40312 | 0.00471  | 0.038127 | -2.82621 | Down | junctophilin 2                                                |
| INSC         | -2.40292 | 4.17E-06 | 0.000255 | -4.60267 | Down | INSC spindle orientation adaptor protein                      |
| FN1          | -2.4003  | 9.15E-07 | 8.07E-05 | -4.90913 | Down | fibronectin 1                                                 |
| ACTBL2       | -2.39082 | 0.003746 | 0.03246  | -2.89875 | Down | actin beta like 2                                             |
| KIF4A        | -2.37867 | 0.001252 | 0.015226 | -3.22668 | Down | kinesin family member 4A                                      |
| VSIG10L      | -2.37789 | 0.001623 | 0.018046 | -3.15176 | Down | V-set and immunoglobulin domain containing 10 like            |
| GPD1         | -2.37721 | 0.002655 | 0.025667 | -3.00509 | Down | glycerol-3-phosphate dehydrogenase 1                          |
| C1QL1        | -2.37667 | 0.000214 | 0.004411 | -3.7015  | Down | complement C1q like 1                                         |
| NPFF         | -2.36906 | 8.90E-05 | 0.002312 | -3.91888 | Down | neuropeptide FF-amide peptide precursor                       |
| OR4N3P       | -2.35827 | 0.005904 | 0.044102 | -2.75305 | Down | olfactory receptor family 4 subfamily N member 3 pseudogene   |
| OR2A12       | -2.34861 | 0.002721 | 0.026055 | -2.99766 | Down | olfactory receptor family 2 subfamily A member 12             |
| CAPNS2       | -2.34428 | 0.000221 | 0.004497 | -3.69321 | Down | calpain small subunit 2                                       |
| OR5AK4P      | -2.34022 | 0.006512 | 0.04726  | -2.72083 | Down | olfactory receptor family 5 subfamily AK member 4 pseudogene  |

|              |          |          |          |          |      |                                                                                                                                    |
|--------------|----------|----------|----------|----------|------|------------------------------------------------------------------------------------------------------------------------------------|
| BEND6        | -2.33639 | 0.000272 | 0.005194 | -3.64043 | Down | BEN domain containing 6                                                                                                            |
| YIPF4        | -2.33303 | 6.30E-05 | 0.00178  | -4.0014  | Down | Yip1 domain family member 4                                                                                                        |
| OR1L8        | -2.33257 | 0.005375 | 0.041436 | -2.78365 | Down | olfactory receptor family 1 subfamily L member 8                                                                                   |
| FAM95B1      | -2.31927 | 0.003903 | 0.033444 | -2.88593 | Down | family with sequence similarity 95 member B1                                                                                       |
| RDH16        | -2.3132  | 0.00098  | 0.012875 | -3.29622 | Down | retinol dehydrogenase 16                                                                                                           |
| HBD          | -2.30048 | 0.006912 | 0.049    | -2.70104 | Down | hemoglobin subunit delta                                                                                                           |
| OR1J2        | -2.29925 | 0.005289 | 0.041019 | -2.7889  | Down | olfactory receptor family 1 subfamily J member 2                                                                                   |
| TAS2R60      | -2.29771 | 0.000463 | 0.007527 | -3.50125 | Down | taste 2 receptor member 60                                                                                                         |
| VSIG4        | -2.29506 | 5.66E-07 | 5.69E-05 | -5.00245 | Down | V-set and immunoglobulin domain containing 4                                                                                       |
| IGF2BP3      | -2.29121 | 0.000493 | 0.007844 | -3.48429 | Down | insulin like growth factor 2 mRNA binding protein 3                                                                                |
| CHRNA10      | -2.28988 | 0.003958 | 0.033807 | -2.88147 | Down | cholinergic receptor nicotinic alpha 10 subunit                                                                                    |
| OR5AP2       | -2.25924 | 0.006852 | 0.048745 | -2.70396 | Down | olfactory receptor family 5 subfamily AP member 2                                                                                  |
| MEP1B        | -2.25724 | 0.004207 | 0.035254 | -2.86219 | Down | meprin A subunit beta                                                                                                              |
| UGT1A9       | -2.25439 | 0.00578  | 0.043574 | -2.76    | Down | UDP glucuronosyltransferase family 1 member A9                                                                                     |
| OR52K1       | -2.24884 | 0.004392 | 0.03629  | -2.84857 | Down | olfactory receptor family 52 subfamily K member 1                                                                                  |
| CYP26B1      | -2.24879 | 0.000361 | 0.006326 | -3.56691 | Down | cytochrome P450 family 26 subfamily B member 1                                                                                     |
| FAT3         | -2.24517 | 0.000527 | 0.008238 | -3.46655 | Down | FAT atypical cadherin 3                                                                                                            |
| IL10         | -2.24228 | 0.003217 | 0.029301 | -2.94624 | Down | interleukin 10                                                                                                                     |
| TNFRSF11A    | -2.24044 | 7.07E-10 | 2.66E-07 | -6.16461 | Down | TNF receptor superfamily member 11a                                                                                                |
| GCGR         | -2.23561 | 0.000942 | 0.012562 | -3.30743 | Down | glucagon receptor                                                                                                                  |
| RERGL        | -2.21524 | 6.67E-06 | 0.000361 | -4.50409 | Down | RERG like                                                                                                                          |
| ZMAT4        | -2.21188 | 0.004388 | 0.03629  | -2.84882 | Down | zinc finger matrin-type 4                                                                                                          |
| CCDC54       | -2.20591 | 0.004509 | 0.036964 | -2.84014 | Down | coiled-coil domain containing 54                                                                                                   |
| OR9A2        | -2.19677 | 0.006953 | 0.049212 | -2.69909 | Down | olfactory receptor family 9 subfamily A member 2                                                                                   |
| SPAG6        | -2.19033 | 0.006245 | 0.045876 | -2.73463 | Down | sperm associated antigen 6                                                                                                         |
| LOC401127    | -2.18482 | 0.000134 | 0.003165 | -3.81831 | Down | WD repeat domain 5 pseudogene                                                                                                      |
| ENTPD3       | -2.18044 | 2.71E-12 | 2.23E-09 | -6.99221 | Down | ectonucleoside triphosphate diphosphohydrolase 3                                                                                   |
| LCN2         | -2.16225 | 4.27E-05 | 0.001359 | -4.09226 | Down | lipocalin 2                                                                                                                        |
| TOP2A        | -2.14257 | 0.001988 | 0.020883 | -3.09206 | Down | DNA topoisomerase II alpha                                                                                                         |
| ACTL7A       | -2.13887 | 0.002923 | 0.027371 | -2.97574 | Down | actin like 7A                                                                                                                      |
| OXGR1        | -2.13657 | 0.003157 | 0.028911 | -2.95204 | Down | oxoglutarate receptor 1                                                                                                            |
| MESP2        | -2.13597 | 0.004817 | 0.038713 | -2.81903 | Down | mesoderm posterior bHLH transcription factor 2                                                                                     |
| CDH22        | -2.13575 | 3.22E-05 | 0.001126 | -4.15707 | Down | cadherin 22                                                                                                                        |
| OR10A5       | -2.13555 | 0.00036  | 0.006308 | -3.56815 | Down | olfactory receptor family 10 subfamily A member 5                                                                                  |
| SPC24        | -2.13072 | 0.002388 | 0.023883 | -3.03725 | Down | SPC24 component of NDC80 kinetochore complex<br>putative deoxyuridine 5'-triphosphate nucleotidohydrolase-like protein<br>FLJ16323 |
| LOC100506422 | -2.12894 | 0.001293 | 0.015506 | -3.21745 | Down | NSUN5 pseudogene 2                                                                                                                 |
| NSUN5P2      | -2.12488 | 0.004023 | 0.034205 | -2.87632 | Down | NSUN5 pseudogene 2                                                                                                                 |
| KLHDC8A      | -2.12063 | 0.001931 | 0.020472 | -3.10071 | Down | kelch domain containing 8A                                                                                                         |
| ANKRD34C     | -2.11947 | 0.005215 | 0.040726 | -2.79342 | Down | ankyrin repeat domain 34C                                                                                                          |
| OR4C46       | -2.11678 | 0.004308 | 0.035862 | -2.85472 | Down | olfactory receptor family 4 subfamily C member 46                                                                                  |
| LINC00671    | -2.11267 | 0.000874 | 0.01186  | -3.32835 | Down | long intergenic non-protein coding RNA 671                                                                                         |
| UCHL1        | -2.10092 | 0.000329 | 0.005946 | -3.59133 | Down | ubiquitin C-terminal hydrolase L1                                                                                                  |



|          |          |          |          |          |      |                                                                     |
|----------|----------|----------|----------|----------|------|---------------------------------------------------------------------|
| HLA-C    | -2.09812 | 0.001034 | 0.01341  | -3.28109 | Down | major histocompatibility complex, class I, C                        |
| CLEC4D   | -2.09688 | 0.006021 | 0.044768 | -2.74665 | Down | C-type lectin domain family 4 member D                              |
| FGL1     | -2.09534 | 2.36E-05 | 0.00089  | -4.22771 | Down | fibrinogen like 1                                                   |
| LRRC10B  | -2.09389 | 0.001064 | 0.013642 | -3.27304 | Down | leucine rich repeat containing 10B                                  |
| CDKN3    | -2.09092 | 0.0001   | 0.002543 | -3.88942 | Down | cyclin dependent kinase inhibitor 3                                 |
| TMEM200C | -2.08833 | 0.000653 | 0.009666 | -3.40863 | Down | transmembrane protein 200C                                          |
| KANK4    | -2.07825 | 0.000722 | 0.010375 | -3.38106 | Down | KN motif and ankyrin repeat domains 4                               |
| ACTC1    | -2.07805 | 0.001404 | 0.016404 | -3.1939  | Down | actin alpha cardiac muscle 1                                        |
| COL6A4P2 | -2.06787 | 0.003406 | 0.030366 | -2.92853 | Down | collagen type VI alpha 4 pseudogene 2                               |
| VASP     | -2.06614 | 9.06E-11 | 5.12E-08 | -6.48188 | Down | vasodilator stimulated phosphoprotein                               |
| LCN10    | -2.05205 | 0.000462 | 0.00752  | -3.50197 | Down | lipocalin 10                                                        |
| MEG3     | -2.04725 | 1.56E-08 | 3.21E-06 | -5.65483 | Down | maternally expressed 3                                              |
| CIT      | -2.04665 | 0.000351 | 0.00623  | -3.57439 | Down | citron rho-interacting serine/threonine kinase                      |
| CTNNA3   | -2.03117 | 0.004056 | 0.034415 | -2.87379 | Down | catenin alpha 3                                                     |
| OR52W1   | -2.02704 | 0.004903 | 0.039089 | -2.81336 | Down | olfactory receptor family 52 subfamily W member 1                   |
| IL5RA    | -2.02549 | 0.006579 | 0.047591 | -2.71742 | Down | interleukin 5 receptor subunit alpha                                |
| RPL31    | -2.02494 | 0.001538 | 0.017454 | -3.16745 | Down | ribosomal protein L31                                               |
| CTSE     | -2.00792 | 0.005802 | 0.043589 | -2.75877 | Down | cathepsin E                                                         |
| SOSTDC1  | -2.00044 | 0.005797 | 0.043583 | -2.75905 | Down | sclerostin domain containing 1                                      |
| TTC8     | -1.99853 | 2.42E-07 | 2.95E-05 | -5.16352 | Down | tetratricopeptide repeat domain 8                                   |
| RADIL    | -1.98793 | 0.001675 | 0.018469 | -3.14246 | Down | Rap associating with DIL domain                                     |
| TAS2R8   | -1.98705 | 0.004385 | 0.03629  | -2.84903 | Down | taste 2 receptor member 8                                           |
| OIP5     | -1.97891 | 0.000709 | 0.010265 | -3.38597 | Down | Opa interacting protein 5                                           |
| OLFM4    | -1.97222 | 0.00062  | 0.009266 | -3.42261 | Down | olfactomedin 4                                                      |
| NDUFA8   | -1.95217 | 1.65E-12 | 1.60E-09 | -7.06142 | Down | NADH:ubiquinoneoxidoreductase subunit A8                            |
| TSPAN1   | -1.94046 | 1.70E-05 | 0.000707 | -4.30155 | Down | tetraspanin 1                                                       |
| SDHAP2   | -1.93873 | 2.15E-07 | 2.68E-05 | -5.18585 | Down | succinate dehydrogenase complex flavoprotein subunit A pseudogene 2 |
| MYCN     | -1.92871 | 0.006923 | 0.049039 | -2.70052 | Down | MYCN proto-oncogene, bHLH transcription factor                      |
| GPR141   | -1.91909 | 0.000936 | 0.012505 | -3.30911 | Down | G protein-coupled receptor 141                                      |
| NTN1     | -1.91802 | 6.50E-07 | 6.32E-05 | -4.9757  | Down | netrin 1                                                            |
| MAGEE2   | -1.90962 | 0.000537 | 0.00834  | -3.46166 | Down | MAGE family member E2                                               |
| EEF1A2   | -1.90299 | 0.000516 | 0.008113 | -3.47224 | Down | eukaryotic translation elongation factor 1 alpha 2                  |
| MAP3K8   | -1.90261 | 0.002553 | 0.024928 | -3.01704 | Down | mitogen-activated protein kinase kinasekinase 8                     |
| OR52E6   | -1.89409 | 0.007    | 0.049484 | -2.69686 | Down | olfactory receptor family 52 subfamily E member 6                   |
| P2RX6    | -1.8888  | 0.002619 | 0.025432 | -3.00924 | Down | purinergic receptor P2X 6                                           |
| CTNNA2   | -1.88542 | 0.001368 | 0.016106 | -3.20124 | Down | catenin alpha 2                                                     |
| SNORD17  | -1.87942 | 0.000449 | 0.007397 | -3.50975 | Down | small nucleolar RNA, C/D box 17                                     |
| DIRC3    | -1.87831 | 0.00023  | 0.004625 | -3.68404 | Down | disrupted in renal carcinoma 3                                      |
| KIF6     | -1.87185 | 7.20E-06 | 0.000384 | -4.4878  | Down | kinesin family member 6                                             |
| TTN      | -1.86646 | 2.37E-05 | 0.00089  | -4.22669 | Down | titin                                                               |
| SAMD3    | -1.85982 | 0.003005 | 0.027939 | -2.96719 | Down | sterile alpha motif domain containing 3                             |
| OR6K3    | -1.85822 | 0.00637  | 0.046452 | -2.72811 | Down | olfactory receptor family 6 subfamily K member 3                    |
| QRICH2   | -1.85193 | 7.62E-05 | 0.002061 | -3.95612 | Down | glutamine rich 2                                                    |

|            |          |          |          |          |      |                                                   |
|------------|----------|----------|----------|----------|------|---------------------------------------------------|
| RRM2       | -1.85099 | 0.002235 | 0.022764 | -3.05702 | Down | ribonucleotidoreductase regulatory subunit M2     |
| BCO2       | -1.84966 | 5.49E-05 | 0.001643 | -4.03358 | Down | beta-carotene oxygenase 2                         |
| MUSTN1     | -1.84629 | 0.000187 | 0.003999 | -3.73656 | Down | musculoskeletal, embryonic nuclear protein 1      |
| OR11H2     | -1.84559 | 0.001589 | 0.017817 | -3.1579  | Down | olfactory receptor family 11 subfamily H member 2 |
| ZNF695     | -1.84353 | 0.000466 | 0.007558 | -3.49967 | Down | zinc finger protein 695                           |
| SULT1C2    | -1.84327 | 0.000838 | 0.011496 | -3.33987 | Down | sulfotransferase family 1C member 2               |
| GTF2H2C    | -1.84144 | 2.42E-08 | 4.62E-06 | -5.57866 | Down | GTF2H2 family member C                            |
| TK1        | -1.83218 | 0.000127 | 0.003035 | -3.83165 | Down | thymidine kinase 1                                |
| GINS2      | -1.83103 | 6.19E-07 | 6.09E-05 | -4.98512 | Down | GINS complex subunit 2                            |
| CCR2       | -1.82698 | 0.004504 | 0.036953 | -2.84055 | Down | C-C motif chemokine receptor 2                    |
| SHCBP1     | -1.82541 | 0.005054 | 0.039942 | -2.80359 | Down | SHC binding and spindle associated 1              |
| RAB11B-AS1 | -1.8231  | 1.61E-05 | 0.000683 | -4.31271 | Down | RAB11B antisense RNA 1                            |
| PRAM1      | -1.81806 | 0.005685 | 0.043083 | -2.76544 | Down | PML-RARA regulated adaptor molecule 1             |
| NCKAP5     | -1.81025 | 9.58E-07 | 8.38E-05 | -4.90001 | Down | NCK associated protein 5                          |
| P2RY12     | -1.80448 | 1.20E-05 | 0.000557 | -4.37801 | Down | purinergic receptor P2Y12                         |
| CNN1       | -1.80432 | 0.000511 | 0.008054 | -3.47488 | Down | calponin 1                                        |
| HRC        | -1.80167 | 5.89E-05 | 0.001709 | -4.01703 | Down | histidine rich calcium binding protein            |
| CYP4Z1     | -1.78642 | 0.005884 | 0.044023 | -2.75418 | Down | cytochrome P450 family 4 subfamily Z member 1     |
| IP6K3      | -1.78353 | 0.00152  | 0.017335 | -3.17089 | Down | inositol hexakisphosphate kinase 3                |
| PTGS2      | -1.7827  | 0.003252 | 0.029509 | -2.94289 | Down | prostaglandin-endoperoxide synthase 2             |
| DEF8       | -1.77864 | 0.000794 | 0.011065 | -3.35471 | Down | differentially expressed in FDCP 8 homolog        |
| FOXD2      | -1.77487 | 0.000539 | 0.008367 | -3.46036 | Down | forkhead box D2                                   |
| APOC1      | -1.77454 | 4.60E-05 | 0.001437 | -4.07517 | Down | apolipoprotein C1                                 |
| LYZ        | -1.77313 | 5.00E-05 | 0.001534 | -4.0555  | Down | lysozyme                                          |
| ITGBL1     | -1.76632 | 1.37E-07 | 1.87E-05 | -5.26957 | Down | integrin subunit beta like 1                      |
| GLP1R      | -1.7604  | 9.18E-08 | 1.36E-05 | -5.34227 | Down | glucagon like peptide 1 receptor                  |
| CYP3A5     | -1.75739 | 0.000151 | 0.003436 | -3.79001 | Down | cytochrome P450 family 3 subfamily A member 5     |
| SH3BP2     | -1.75378 | 0.00039  | 0.006665 | -3.54652 | Down | SH3 domain binding protein 2                      |
| SNORA47    | -1.75268 | 8.24E-07 | 7.44E-05 | -4.9295  | Down | small nucleolar RNA, H/ACA box 47                 |
| NDRG4      | -1.74784 | 0.002093 | 0.02164  | -3.07666 | Down | NDRG family member 4                              |
| KLRK1      | -1.74544 | 0.000776 | 0.010938 | -3.36131 | Down | killer cell lectin like receptor K1               |
| CNGA4      | -1.73089 | 0.00257  | 0.025014 | -3.01493 | Down | cyclic nucleotide gated channel subunit alpha 4   |
| APOC2      | -1.71885 | 0.000977 | 0.012856 | -3.29702 | Down | apolipoprotein C2                                 |
| SCD5       | -1.71546 | 1.24E-07 | 1.74E-05 | -5.28776 | Down | stearoyl-CoA desaturase 5                         |
| KRTAP5-1   | -1.71212 | 0.001104 | 0.014013 | -3.26265 | Down | keratin associated protein 5-1                    |
| FAM223A    | -1.71176 | 0.006595 | 0.047609 | -2.71663 | Down | family with sequence similarity 223 member A      |
| ANKRD23    | -1.70813 | 1.69E-06 | 0.000135 | -4.78678 | Down | ankyrin repeat domain 23                          |
| HADH       | -1.70627 | 3.96E-09 | 1.04E-06 | -5.88592 | Down | hydroxyacyl-CoA dehydrogenase                     |
| SERPINA3   | -1.70483 | 0.00017  | 0.003704 | -3.76058 | Down | serpin family A member 3                          |
| OR52D1     | -1.7042  | 0.004591 | 0.037466 | -2.83438 | Down | olfactory receptor family 52 subfamily D member 1 |
| TMEM178A   | -1.70223 | 0.002146 | 0.022047 | -3.06927 | Down | transmembrane protein 178A                        |
| BMS1P4     | -1.69662 | 4.36E-07 | 4.67E-05 | -5.05261 | Down | BMS1 pseudogene 4                                 |
| SMAD9      | -1.68648 | 0.006737 | 0.048175 | -2.70957 | Down | SMAD family member 9                              |

|              |          |          |          |          |      |                                                           |
|--------------|----------|----------|----------|----------|------|-----------------------------------------------------------|
| PIGP         | -1.68357 | 4.36E-08 | 7.24E-06 | -5.47564 | Down | phosphatidylinositol glycan anchor biosynthesis class P   |
| GALK2        | -1.68337 | 2.87E-13 | 4.33E-10 | -7.30016 | Down | galactokinase 2                                           |
| SNORA70E     | -1.68291 | 0.001609 | 0.017966 | -3.1543  | Down | small nucleolar RNA, H/ACA box 70E                        |
| NEFM         | -1.6821  | 4.63E-05 | 0.001444 | -4.07361 | Down | neurofilament medium                                      |
| ZNF622       | -1.67707 | 3.95E-08 | 6.81E-06 | -5.49285 | Down | zinc finger protein 622                                   |
| EFNA4        | -1.67629 | 0.001144 | 0.014391 | -3.25251 | Down | ephrin A4                                                 |
| LRP5L        | -1.67397 | 1.35E-05 | 0.000604 | -4.35245 | Down | LDL receptor related protein 5 like                       |
| MED10        | -1.67292 | 3.27E-06 | 0.000215 | -4.65306 | Down | mediator complex subunit 10                               |
| PIR          | -1.67257 | 1.57E-07 | 2.11E-05 | -5.24394 | Down | pirin                                                     |
| HSD17B3      | -1.67244 | 0.00193  | 0.020472 | -3.10075 | Down | hydroxysteroid 17-beta dehydrogenase 3                    |
| MRO          | -1.66683 | 2.46E-05 | 0.000915 | -4.21819 | Down | maestro                                                   |
| PTGFR        | -1.66615 | 4.11E-08 | 6.95E-06 | -5.48615 | Down | prostaglandin F receptor                                  |
| GUSBP11      | -1.66179 | 9.52E-08 | 1.40E-05 | -5.33562 | Down | GUSB pseudogene 11                                        |
| CDK15        | -1.66068 | 0.000948 | 0.012618 | -3.30537 | Down | cyclin dependent kinase 15                                |
| WDR3         | -1.65943 | 1.43E-08 | 3.05E-06 | -5.66959 | Down | WD repeat domain 3                                        |
| SCRG1        | -1.65505 | 0.001442 | 0.016755 | -3.1861  | Down | stimulator of chondrogenesis 1                            |
| NR6A1        | -1.65044 | 0.00046  | 0.007518 | -3.50276 | Down | nuclear receptor subfamily 6 group A member 1             |
| FAM72D       | -1.63864 | 0.00183  | 0.019741 | -3.11653 | Down | family with sequence similarity 72 member D               |
| ZNF391       | -1.63472 | 8.82E-06 | 0.000445 | -4.44436 | Down | zinc finger protein 391                                   |
| CFB          | -1.63155 | 0.000144 | 0.003338 | -3.80159 | Down | complement factor B                                       |
| LGI2         | -1.62508 | 2.48E-06 | 0.000175 | -4.70977 | Down | leucine rich repeat LGI family member 2                   |
| FCHO1        | -1.62484 | 0.005264 | 0.04091  | -2.79039 | Down | FCH and mu domain containing endocytic adaptor 1          |
| LRRC7        | -1.62384 | 0.002558 | 0.024957 | -3.01644 | Down | leucine rich repeat containing 7                          |
| NEK6         | -1.62009 | 0.00659  | 0.047609 | -2.71687 | Down | NIMA related kinase 6                                     |
| LOC648987    | -1.61592 | 0.003007 | 0.02794  | -2.96703 | Down | uncharacterized LOC648987                                 |
| MMP28        | -1.60978 | 0.000384 | 0.006598 | -3.55064 | Down | matrix metalloproteinase 28                               |
| LHFPL3-AS2   | -1.60714 | 0.000745 | 0.010639 | -3.37256 | Down | LHFPL3 antisense RNA 2                                    |
| AKR1C2       | -1.60408 | 2.37E-05 | 0.00089  | -4.22683 | Down | aldo-ketoreductase family 1 member C2                     |
| BUB1B        | -1.60351 | 0.005799 | 0.043583 | -2.75895 | Down | BUB1 mitotic checkpoint serine/threonine kinase B         |
| LOC100507547 | -1.60229 | 0.000828 | 0.011404 | -3.34317 | Down | uncharacterized LOC100507547                              |
| CDH23        | -1.59792 | 0.001165 | 0.01459  | -3.24742 | Down | cadherin related 23                                       |
| ANXA10       | -1.59619 | 7.10E-06 | 0.000381 | -4.49071 | Down | annexin A10                                               |
| ADAMTS2      | -1.59391 | 7.57E-07 | 6.88E-05 | -4.94615 | Down | ADAM metalloproteinase with thrombospondin type 1 motif 2 |
| PAPOLB       | -1.58767 | 0.005074 | 0.040061 | -2.80231 | Down | poly(A) polymerase beta                                   |
| CDKN1C       | -1.58201 | 2.08E-06 | 0.000154 | -4.74542 | Down | cyclin dependent kinase inhibitor 1C                      |
| ATP2C1       | -1.58082 | 0.001222 | 0.015003 | -3.23363 | Down | ATPase secretory pathway Ca <sup>2+</sup> transporting 1  |
| SPAG17       | -1.57901 | 0.003276 | 0.029678 | -2.94057 | Down | sperm associated antigen 17                               |
| P2RY1        | -1.57648 | 0.000798 | 0.011091 | -3.35364 | Down | purinergic receptor P2Y1                                  |
| IGSF11       | -1.57462 | 1.96E-05 | 0.000779 | -4.26992 | Down | immunoglobulin superfamily member 11                      |
| COMM7        | -1.57449 | 0.000354 | 0.006238 | -3.57221 | Down | COMM domain containing 7                                  |
| LOC440173    | -1.5733  | 0.000203 | 0.004248 | -3.71519 | Down | uncharacterized LOC440173                                 |
| UBXN10       | -1.56955 | 0.003965 | 0.033807 | -2.8809  | Down | UBX domain protein 10                                     |
| TSHZ3        | -1.56942 | 3.81E-05 | 0.001252 | -4.11863 | Down | teashirt zinc finger homeobox 3                           |

|            |          |          |          |          |      |                                                                          |
|------------|----------|----------|----------|----------|------|--------------------------------------------------------------------------|
| LRRC39     | -1.56781 | 0.00276  | 0.02628  | -2.99327 | Down | leucine rich repeat containing 39                                        |
| PDLIM3     | -1.56765 | 3.35E-05 | 0.001154 | -4.14833 | Down | PDZ and LIM domain 3                                                     |
| IFI27L2    | -1.56751 | 0.004728 | 0.038202 | -2.825   | Down | interferon alpha inducible protein 27 like 2                             |
| EFCAB12    | -1.56177 | 0.005243 | 0.040847 | -2.79172 | Down | EF-hand calcium binding domain 12                                        |
| SCGB2A1    | -1.56061 | 0.005011 | 0.039689 | -2.80634 | Down | secretoglobin family 2A member 1                                         |
| CRYGS      | -1.56043 | 0.003935 | 0.033661 | -2.88331 | Down | crystallin gamma S                                                       |
| ARHGAP20   | -1.55688 | 0.001308 | 0.015618 | -3.21424 | Down | Rho GTPase activating protein 20                                         |
| FRMPD1     | -1.54919 | 0.001419 | 0.016541 | -3.19075 | Down | FERM and PDZ domain containing 1                                         |
| KIF20B     | -1.54488 | 0.001915 | 0.020374 | -3.10318 | Down | kinesin family member 20B                                                |
| SELL       | -1.54158 | 0.003719 | 0.032311 | -2.90103 | Down | selectin L                                                               |
| NEDD8      | -1.54099 | 4.08E-09 | 1.04E-06 | -5.88096 | Down | NEDD8 ubiquitin like modifier                                            |
| RASSF1     | -1.54021 | 0.000352 | 0.006238 | -3.57352 | Down | Ras association domain family member 1                                   |
| ESR1       | -1.53465 | 0.003504 | 0.030999 | -2.91966 | Down | estrogen receptor 1                                                      |
| ERVK13-1   | -1.52459 | 0.000155 | 0.003502 | -3.78254 | Down | endogenous retrovirus group K13 member 1                                 |
| HEBP2      | -1.51608 | 1.06E-06 | 9.13E-05 | -4.88012 | Down | heme binding protein 2                                                   |
| ARHGAP22   | -1.51421 | 0.002497 | 0.024632 | -3.02369 | Down | Rho GTPase activating protein 22                                         |
| TYW1B      | -1.51088 | 2.73E-06 | 0.000187 | -4.69036 | Down | tRNA-yW synthesizing protein 1 homolog B                                 |
| AGAP2      | -1.51064 | 0.003808 | 0.03285  | -2.89366 | Down | ArfGAP with GTPase domain, ankyrin repeat and PH domain 2                |
| CYP4F12    | -1.5094  | 0.004865 | 0.038909 | -2.81584 | Down | cytochrome P450 family 4 subfamily F member 12                           |
| RASD2      | -1.50824 | 1.28E-06 | 0.000107 | -4.84244 | Down | RASD family member 2                                                     |
| SLC26A7    | -1.50389 | 0.002177 | 0.022312 | -3.06497 | Down | solute carrier family 26 member 7                                        |
| LY6G5B     | -1.49949 | 0.002268 | 0.023028 | -3.05265 | Down | lymphocyte antigen 6 family member G5B                                   |
| TFCP2L1    | -1.49843 | 5.31E-06 | 0.000312 | -4.55219 | Down | transcription factor CP2 like 1                                          |
| CSF2RA     | -1.49594 | 0.002137 | 0.02198  | -3.07048 | Down | colony stimulating factor 2 receptor subunit alpha                       |
| TDH        | -1.49341 | 0.001129 | 0.014269 | -3.25632 | Down | L-threonine dehydrogenase (pseudogene)                                   |
| RELT       | -1.49125 | 0.001848 | 0.019864 | -3.11363 | Down | RELT TNF receptor                                                        |
| MAP1A      | -1.48562 | 0.001649 | 0.018241 | -3.14714 | Down | microtubule associated protein 1A                                        |
| LOXL1      | -1.48506 | 0.000251 | 0.004917 | -3.66139 | Down | lysyl oxidase like 1                                                     |
| KIF18A     | -1.48239 | 0.001571 | 0.017708 | -3.16123 | Down | kinesin family member 18A                                                |
| B3GNT3     | -1.47982 | 0.002083 | 0.021574 | -3.07809 | Down | UDP-GlcNAc:betaGal beta-1,3-N-acetylglucosaminyltransferase 3            |
| LOC646214  | -1.47392 | 0.001568 | 0.017688 | -3.16181 | Down | p21 (RAC1) activated kinase 2 pseudogene                                 |
| PRICKLE4   | -1.47244 | 0.003718 | 0.032311 | -2.90114 | Down | prickle planar cell polarity protein 4                                   |
| MYO1F      | -1.47133 | 0.000544 | 0.008416 | -3.45796 | Down | myosin IF                                                                |
| JMJD6      | -1.47043 | 4.70E-07 | 4.99E-05 | -5.03799 | Down | jumonji domain containing 6, arginine demethylase and lysine hydroxylase |
| TXNDC9     | -1.46925 | 6.09E-13 | 7.86E-10 | -7.19855 | Down | thioredoxin domain containing 9                                          |
| STXBP5-AS1 | -1.4673  | 0.002667 | 0.025755 | -3.00372 | Down | STXBP5 antisense RNA 1                                                   |
| LUC7L      | -1.46492 | 1.72E-06 | 0.000136 | -4.78434 | Down | LUC7 like                                                                |
| ARG2       | -1.46353 | 0.002923 | 0.027371 | -2.97571 | Down | arginase 2                                                               |
| POU5F1     | -1.45988 | 0.006916 | 0.049011 | -2.70084 | Down | POU class 5 homeobox 1                                                   |
| ARHGAP9    | -1.45129 | 0.002566 | 0.025001 | -3.01541 | Down | Rho GTPase activating protein 9                                          |
| LINC00239  | -1.45125 | 0.001024 | 0.013326 | -3.28388 | Down | long intergenic non-protein coding RNA 239                               |
| MS4A7      | -1.44992 | 2.59E-05 | 0.000948 | -4.20697 | Down | membrane spanning 4-domains A7                                           |
| ROBO1      | -1.44661 | 0.000429 | 0.007144 | -3.52164 | Down | roundabout guidance receptor 1                                           |

|           |          |          |          |          |      |                                                            |
|-----------|----------|----------|----------|----------|------|------------------------------------------------------------|
| TRIM66    | -1.44341 | 5.54E-06 | 0.000322 | -4.5431  | Down | tripartite motif containing 66                             |
| ALOX5     | -1.43679 | 1.24E-07 | 1.74E-05 | -5.28802 | Down | arachidonate 5-lipoxygenase                                |
| GPX2      | -1.43654 | 0.000227 | 0.004581 | -3.68729 | Down | glutathione peroxidase 2                                   |
| EXOSC8    | -1.43535 | 3.46E-10 | 1.40E-07 | -6.27648 | Down | exosome component 8                                        |
| NUSAP1    | -1.43456 | 0.001488 | 0.017083 | -3.17698 | Down | nucleolar and spindle associated protein 1                 |
| ANLN      | -1.43239 | 0.004239 | 0.035455 | -2.8598  | Down | anillin actin binding protein                              |
| CDK1      | -1.43222 | 0.001258 | 0.015231 | -3.22537 | Down | cyclin dependent kinase 1                                  |
| SELPLG    | -1.43155 | 0.000579 | 0.008821 | -3.44138 | Down | selectin P ligand                                          |
| GREB1     | -1.42927 | 3.36E-07 | 3.75E-05 | -5.10196 | Down | growth regulating estrogen receptor binding 1              |
| MYH11     | -1.42608 | 0.004478 | 0.036813 | -2.84233 | Down | myosin heavy chain 11                                      |
| ABCB1     | -1.42508 | 0.001795 | 0.019432 | -3.12223 | Down | ATP binding cassette subfamily B member 1                  |
| CHCHD1    | -1.41714 | 0.001135 | 0.014326 | -3.25479 | Down | coiled-coil-helix-coiled-coil-helix domain containing 1    |
| PDE1C     | -1.41678 | 0.001008 | 0.013153 | -3.28817 | Down | phosphodiesterase 1C                                       |
| DLG2      | -1.41507 | 6.13E-05 | 0.001753 | -4.00758 | Down | discs large MAGUK scaffold protein 2                       |
| SNORA57   | -1.41264 | 0.000168 | 0.00368  | -3.76338 | Down | small nucleolar RNA, H/ACA box 57                          |
| COQ5      | -1.41257 | 1.02E-06 | 8.87E-05 | -4.88694 | Down | coenzyme Q5, methyltransferase                             |
| CYP2J2    | -1.40784 | 7.09E-05 | 0.001948 | -3.97338 | Down | cytochrome P450 family 2 subfamily J member 2              |
| TEKT2     | -1.40714 | 0.001087 | 0.013854 | -3.26686 | Down | tektin 2                                                   |
| CPA4      | -1.39844 | 0.002227 | 0.022694 | -3.05821 | Down | carboxypeptidase A4                                        |
| OR4F3     | -1.39842 | 0.006622 | 0.04769  | -2.71528 | Down | olfactory receptor family 4 subfamily F member 3           |
| ADAMTS10  | -1.39793 | 0.00084  | 0.011516 | -3.33917 | Down | ADAM metalloproteinase with thrombospondin type 1 motif 10 |
| VAV3      | -1.39763 | 3.65E-06 | 0.000231 | -4.63055 | Down | vav guanine nucleotide exchange factor 3                   |
| HSD17B7P2 | -1.39759 | 1.68E-05 | 0.000705 | -4.30357 | Down | hydroxysteroid 17-beta dehydrogenase 7 pseudogene 2        |
| TYMS      | -1.39182 | 8.67E-05 | 0.00227  | -3.92507 | Down | thymidylatesynthetase                                      |
| SCN1B     | -1.39167 | 3.70E-06 | 0.000233 | -4.62739 | Down | sodium voltage-gated channel beta subunit 1                |
| LAT       | -1.38953 | 0.001091 | 0.013873 | -3.26588 | Down | linker for activation of T cells                           |
| SNORA71B  | -1.3858  | 0.001448 | 0.016813 | -3.18491 | Down | small nucleolar RNA, H/ACA box 71B                         |
| SMIM5     | -1.38397 | 0.002396 | 0.023909 | -3.03617 | Down | small integral membrane protein 5                          |
| MATN3     | -1.38264 | 0.00087  | 0.011855 | -3.32948 | Down | matrilin 3                                                 |
| RNASE2    | -1.37954 | 0.004946 | 0.039334 | -2.81051 | Down | ribonuclease A family member 2                             |
| SWT1      | -1.36623 | 1.40E-05 | 0.000618 | -4.3442  | Down | SWT1 RNA endoribonuclease homolog                          |
| LAMB3     | -1.36487 | 0.002986 | 0.027804 | -2.96915 | Down | laminin subunit beta 3                                     |
| LINC00244 | -1.36128 | 0.005216 | 0.040726 | -2.79338 | Down | long intergenic non-protein coding RNA 244                 |
| PRODH     | -1.36073 | 0.001733 | 0.018929 | -3.1326  | Down | proline dehydrogenase 1                                    |
| SRD5A1    | -1.35922 | 4.03E-06 | 0.000249 | -4.60986 | Down | steroid 5 alpha-reductase 1                                |
| SRPX2     | -1.35844 | 5.74E-07 | 5.74E-05 | -4.99961 | Down | sushi repeat containing protein X-linked 2                 |
| APOBEC2   | -1.35451 | 1.34E-06 | 0.000111 | -4.8333  | Down | apolipoprotein B mRNA editing enzyme catalytic subunit 2   |
| PKDREJ    | -1.35249 | 0.002568 | 0.025007 | -3.01517 | Down | polycystin family receptor for egg jelly                   |
| SGIP1     | -1.35053 | 0.000715 | 0.010307 | -3.38374 | Down | SH3GL interacting endocytic adaptor 1                      |
| NAPSB     | -1.34741 | 0.001225 | 0.015005 | -3.23311 | Down | napsin B aspartic peptidase, pseudogene                    |
| MBL1P     | -1.34188 | 0.004945 | 0.039334 | -2.81059 | Down | mannose binding lectin 1, pseudogene                       |
| SLC7A7    | -1.33735 | 1.58E-05 | 0.000674 | -4.31659 | Down | solute carrier family 7 member 7                           |
| GLG1      | -1.33647 | 4.71E-07 | 4.99E-05 | -5.03762 | Down | golgi glycoprotein 1                                       |

|              |          |          |          |          |      |                                                                                 |
|--------------|----------|----------|----------|----------|------|---------------------------------------------------------------------------------|
| SNORA10      | -1.33039 | 0.001471 | 0.017006 | -3.18032 | Down | small nucleolar RNA, H/ACA box 10                                               |
| TPM2         | -1.32665 | 6.85E-08 | 1.04E-05 | -5.39512 | Down | tropomyosin 2                                                                   |
| MEG8         | -1.32203 | 1.68E-07 | 2.23E-05 | -5.23175 | Down | maternally expressed 8, small nucleolar RNA host gene                           |
| ASB16        | -1.32095 | 5.04E-05 | 0.001536 | -4.05368 | Down | ankyrin repeat and SOCS box containing 16                                       |
| RAD51AP1     | -1.31844 | 0.001646 | 0.018238 | -3.14755 | Down | RAD51 associated protein 1                                                      |
| TBC1D3       | -1.31758 | 0.000265 | 0.005132 | -3.6469  | Down | TBC1 domain family member 3                                                     |
| SIX2         | -1.31048 | 0.000344 | 0.006141 | -3.57942 | Down | SIX homeobox 2                                                                  |
| TBC1D3F      | -1.30768 | 0.000476 | 0.007661 | -3.49393 | Down | TBC1 domain family member 3F                                                    |
| SAMHD1       | -1.30624 | 3.02E-08 | 5.40E-06 | -5.54048 | Down | SAM and HD domain containing deoxynucleoside triphosphate triphosphohydrolase 1 |
| FAM227A      | -1.3019  | 0.001032 | 0.01339  | -3.28173 | Down | family with sequence similarity 227 member A                                    |
| LOC100506123 | -1.30135 | 0.001802 | 0.019495 | -3.12109 | Down | uncharacterized LOC100506123                                                    |
| SERTAD4-AS1  | -1.30081 | 0.003311 | 0.029845 | -2.93729 | Down | SERTAD4 antisense RNA 1                                                         |

**Table 3** The enriched GO terms of the up and down regulated differentially expressed genes

| GO ID                     | CATEGORY | GO Name                            | Adjusted p value | negative log10 of adjusted p value | Gene Count | Gene                                                                                                                                                                                                                                                                                                                                                                                                                                                                                                                                                                                                                                                                                                                                                                                                                                             |
|---------------------------|----------|------------------------------------|------------------|------------------------------------|------------|--------------------------------------------------------------------------------------------------------------------------------------------------------------------------------------------------------------------------------------------------------------------------------------------------------------------------------------------------------------------------------------------------------------------------------------------------------------------------------------------------------------------------------------------------------------------------------------------------------------------------------------------------------------------------------------------------------------------------------------------------------------------------------------------------------------------------------------------------|
| <b>Up regulated genes</b> |          |                                    |                  |                                    |            |                                                                                                                                                                                                                                                                                                                                                                                                                                                                                                                                                                                                                                                                                                                                                                                                                                                  |
| GO:0007275                | BP       | multicellular organism development | 1.03027E-05      | 4.987047489                        | 192        | IGF2,KRT6A,LCE3D,SPRR3,FLG,SPRR2D,SPRR1B,S LITRK6,FGF21,TBX22,CA LCR,SPRR1A,USH2A,OTX 2,DCC,KCP,NOG,STAR,K RT16,IL1RN,SHISA2,AQP 5,SYNDIG1,TFAP2C,ERRF I1,PLP1,ALOX12,KRT13,S PRR2E,TENM1,PEMT,LY6 H,FAP,EYA4,LCE3E,EGR1 ,CSGALNACT1,MAL,MM P16,PTGER4,COL6A3,OAS 2,ETV4,MAOB,GPC6,SOC S5,BCL9,POU6F2,BTG2,P RR15,VEGFC,FAM20C,MP Z,TMEM176A,KLK13,RPS 6,ID3,ALOXE3,DDIT4,IRF 2BP2,KLF15,EGR3,RNF16 5,LTBP4,CREB3L1,EMX1, KLF3,ZFP36,QDPR,ETV5, KL,GADD45B,NXN,TLE3, HEYL,HRAS,GLI3,SFTPD, MYC,IGSF8,DMD,FKBP8, DBP,MTCH1,KLF10,PODX L,BVES,MNT,LSR,CEL,FO SL2,WASF1,PAPSS2,NR1 D1,DUSP4,SNX19,FOXN3, IL6ST,IL6R,PCDHB6,KLF6 ,ZFP36L1,PBX1,SH3RF1,C NTN3,NHEJ1,BOC,STAT1, DUSP1,CLSTN2,DIP2B,M YADM,PCDHB11,APOD.N ROB2,NHS,SYVN1,TCF7L 2,DLL4,NNMT,SMAD1,TP 53,PCDH18,SUN2,SOS1,P RKACA,EGFR,ETS1,PIK3 CA,TSHZ1,GCNT2,PKN1, TNFRSF1A,ELOVL1,NCS |



|            |    |                                     |             |             |     |                                                                                                                                                                                                                                                                                                                                                                                                                                                                                                                                                                                                                                                                                                                                                                                                                                                                                                                                                                                                                                                                                                                                                                                                                                                                                                                                                                                                                                                                                       |
|------------|----|-------------------------------------|-------------|-------------|-----|---------------------------------------------------------------------------------------------------------------------------------------------------------------------------------------------------------------------------------------------------------------------------------------------------------------------------------------------------------------------------------------------------------------------------------------------------------------------------------------------------------------------------------------------------------------------------------------------------------------------------------------------------------------------------------------------------------------------------------------------------------------------------------------------------------------------------------------------------------------------------------------------------------------------------------------------------------------------------------------------------------------------------------------------------------------------------------------------------------------------------------------------------------------------------------------------------------------------------------------------------------------------------------------------------------------------------------------------------------------------------------------------------------------------------------------------------------------------------------------|
| GO:0006807 | BP | nitrogen compound metabolic process | 8.09009E-05 | 4.092046627 | 292 | TN,MFAP2,YBX1,PLCE1,NDST1,KCNJ8,GAMT,DGCR2,TPI1,JMJD8,NES,WDTC1,MAML1,PCDHB4,NFIB,MAPK3,SLC23A2,FOXK1,CAMSAP3,ACVR2B,PLOD3,ZFH3,SMURF1,PRMT6,PRKCSH,ETV6,GSK3A,WDR74,BCOR,NPAS2,USP1,RBM47,RNF43,TCOF1,NCL,METTL14,KCTD11,HP90AA1,BTG1,GAB1,SIPR1,THRB,EDNRB,SYBU,CDNF,MEX3C,SH2,FKBIA,GJA1,CD34,DEAF1,INSR,NR1D2,GADD45G,ZNRF3,MBOAT7,BSG,BTF3CRNN,PGA5,CGA,FGA,IGF2,FGB,APOA5,SPRR3,FLG,SPRR1B,FGF21,FGG,TBX22,CALCR,PGC,SPRR1A,ABCB11,OTX2,MUC21,NOG,HSFX2,ZSCAN10,TFA P2C,ERRFI1,RUNX1T1,ALOX12,SPRR2E,PDK4,TENM1,HAO1,PEMT,FAP,EYA4,ZNF554,EGR1,CSGALNACT1,GCG,MMP16,ADAMTS8,COL6A3,MAPK4,OAS2,ETV4,MAOB,GPC6,SOC5,GMNC,BCL9,PDK3,POU6F2,BTG2,A4GNT,CS T6,VEGFC,FAM20C,USP27X,STK32B,KLK13,RPS6,LD3,PGAP2,ALOXE3,LSM11,BCAP31,DDIT4,DPP4,TY SND1,IRF2BP2,KLF15,EGR3,RNF165,PHLDA1,LTBP4,IKZF4,CREB3L1,AICFE,MX1,NAT10,ACSL6,KLF3,ZFP36,QDPR,OAS1,ETV5,GADD45B,MAN1A1,NXN,TLE3,RPL8,HEYL,PER3,HRAS,GLI3,SFTPD,MYC,RP RD2,DMD,ZNF416,FKBP8,RPS28,DBP,MUC6,MTCH1,CHST10,KLF9,EIF4B,KLF10,GLTP,MNT,CEL,NUP205,FOSL2,ZNF362,PAPSS2,NR1D1,DUSP4,SMCR8,FECH,FOXN3,IL6ST,IL6R,ZNF581,KLF6,CPA1,ABCA1,ZFP36L1,PBX1,SH3RF1,URM1,ERN1,RPL18,RNF24,PRRC1,NHEJ1,PDK2,STAT1,HSPA2,DUSP1,DIP2B,FMOD,MYADM,APOD,GLS,FBXO32,SRM,DIRAS3,NROB2,SYVN1,ARL6IP1,TCF7L2,TMUB1,MRPL37,DLL4,HELZ2,NNMT,SMAD1,TP53,ELK1,PTBP1,PRKACA,BACH2,CTSF,EGFR,ETS1,PIK3CA,ZNRF1,CMPK2,GUK1,TSHZ1,ZNF326,MED13L,GCNT2,SAE1,PKN1,TNFRSF1A,ELOVL1,TUT1,NCSTN,YBX1,PPP1R3B,PLCE1,NDST1,ATF6B,GAMT,TPI1,JMJD8,SECISBP2L, |
|------------|----|-------------------------------------|-------------|-------------|-----|---------------------------------------------------------------------------------------------------------------------------------------------------------------------------------------------------------------------------------------------------------------------------------------------------------------------------------------------------------------------------------------------------------------------------------------------------------------------------------------------------------------------------------------------------------------------------------------------------------------------------------------------------------------------------------------------------------------------------------------------------------------------------------------------------------------------------------------------------------------------------------------------------------------------------------------------------------------------------------------------------------------------------------------------------------------------------------------------------------------------------------------------------------------------------------------------------------------------------------------------------------------------------------------------------------------------------------------------------------------------------------------------------------------------------------------------------------------------------------------|

|            |    |                            |             |             |     |                                                                                                                                                                                                                                                                                                                                                                                                                                                                                                                                                                                                                                                                                                                                                                                                                                                                                                                                                                                                                 |
|------------|----|----------------------------|-------------|-------------|-----|-----------------------------------------------------------------------------------------------------------------------------------------------------------------------------------------------------------------------------------------------------------------------------------------------------------------------------------------------------------------------------------------------------------------------------------------------------------------------------------------------------------------------------------------------------------------------------------------------------------------------------------------------------------------------------------------------------------------------------------------------------------------------------------------------------------------------------------------------------------------------------------------------------------------------------------------------------------------------------------------------------------------|
|            |    |                            |             |             |     | <p>PRPF8,EIF3B,WDTC1,MA<br/>ML1,CRNKL1,NFIB,MAP<br/>K3,RPL18A,CNDP2,SERT<br/>AD2,RCE1,FOXK1,ZNF64<br/>6,ACVR2B,PLOD3,ZFHX3,<br/>SMURF1,AOX1,RPS15,PR<br/>MT6,TRIM24,PRKCSH,ET<br/>V6,GSK3A,WDR74,LARP6<br/>,BCOR,URB1,ZNF341,SGT<br/>A,STUB1,NPAS2,MAOA,U<br/>SP1,RBM47,RNF43,SHISA<br/>5,TCOF1,NCL,FKBP5,RB<br/>M22,METT14,PIGM,ATF<br/>7IP,POLR1D,UBAP2,UBE2<br/>E2,SPPL3,KCTD11,HSP90<br/>AA1,BTG1,S1PR1,THRB,R<br/>PL39,UTP14A,EDNRB,CR<br/>TC3,AK1,MED25,ERP29,R<br/>BM23,RNASEK,LPCAT3,C<br/>ASC3,MTMR3,TKNS,SF3A<br/>1,ADPRHL1,MEX3C,SIAH<br/>2,ACD,NFKBIA,GJA1,RNP<br/>S1,ATP13A2,TXNDC5,MR<br/>PL49,SLC35C2,CD34,SQS<br/>TM1,DEAF1,INSR,RPL19,<br/>NR1D2,AGBL5,SP2,SLC2<br/>A4RG,MRPS18B,NEDD9,G<br/>ADD45G,ZNRF3,MAST3,S<br/>NX12,BAZ2A,MBOAT7,GI<br/>D8,DCPS,LIG3,SP4,KLF11,<br/>CIZ1,LNX1,RALB,BTF3,Z<br/>NF836</p>                                                                                                                                                                                 |
| GO:0031974 | CC | membrane-enclosed<br>lumen | 0.000311835 | 3.506075034 | 175 | <p>PGA5,CGA,FGA,IGF2,FGB<br/>,APOA5,FGG,MUC21,STA<br/>R,ZSCAN10,TFAP2C,RUN<br/>X1T1,SLC7A14,PKD4,TEN<br/>M1,HAO1,ZNF554,EGR1,G<br/>CG,MMP16,COL6A3,MAP<br/>K4,OAS2,ETV4,GPC6,BCL<br/>9,PKD3,VEGFC,FAM20C,<br/>RPS6,LSM11,TYSND1,IRF<br/>2BP2,KLF15,PHLDA1,IKZ<br/>F4,A1CF,EMX1,NAT10,KL<br/>F3,OAS1,ETV5,GRIK5,GP<br/>R63,TLE3,HEYL,HRAS,GL<br/>I3,MYC,RPRD2,IRS1,RPS2<br/>8,MUC6,KLF9,PODXL,MN<br/>T,NUP205,FOSL2,NR1D1,<br/>DUSP4,SMCR8,FECH,KLF<br/>6,PBX1,RPL18,ABCG2,NH<br/>EJ1,PKD2,SELENBP1,STA<br/>T1,HSPA2,FMOD,GLS,FB<br/>XO32,NR0B2,NHS,SYVN1<br/>,TCF7L2, TMUB1,MRPL37,<br/>HELZ2,SMAD1,TP53,ELK<br/>1,SUN2,PTBP1,PRKACA,B<br/>ACH2,TOR2A,CTSF,EGFR<br/>,ETS1,CMPK2,C17ORF49,<br/>ZNF326,SAE1,PKN1,TUT1<br/>,YBX1,ME2,JMJD8,PRPF8,<br/>WDTC1,MAML1,CRNKL1,<br/>NFIB,MAPK3,CNDP2,SER<br/>TAD2,FOXK1,CAMSAP3,P<br/>LOD3,FAM193B,ZFHX3,S<br/>MURF1,RPS15,PRMT6,TRI<br/>M24,PRKCSH,ETV6,WDR<br/>74,BCOR,URB1,STUB1,NP<br/>AS2,USP1,SHISA5,TCOF1,<br/>NCL,FKBP5,RBM22,METT<br/>L14,MZT2B,ATF7IP,POLR</p> |

|            |    |                 |             |             |     |                                                                                                                                                                                                                                                                                                                                                                                                                                                                                                                                                                                                                                                                                                                                                                                                                                                                                                                                                                                                                                                                                                                           |
|------------|----|-----------------|-------------|-------------|-----|---------------------------------------------------------------------------------------------------------------------------------------------------------------------------------------------------------------------------------------------------------------------------------------------------------------------------------------------------------------------------------------------------------------------------------------------------------------------------------------------------------------------------------------------------------------------------------------------------------------------------------------------------------------------------------------------------------------------------------------------------------------------------------------------------------------------------------------------------------------------------------------------------------------------------------------------------------------------------------------------------------------------------------------------------------------------------------------------------------------------------|
| GO:0031981 | CC | nuclear lumen   | 0.004404749 | 2.356078816 | 139 | <p>1D,FIGN,HSP90AA1,BTG1,S1PR1,THRB,UTP14A,CRTC3,MED25,ERP29,CASC3,TNKS,SF3A1,CHID1,SIAH2,ACD,NFKBIA,ARHGAP17,GJA1,RNPS1,ATP13A2,TXNDC5,MRPL49,SLC35C2,SQSTM1,DEAF1,INSR,RPL19,NR1D2,SP2,SLC2A4RG,MRPS18B,NEDD9,BAZ2A,CCDC86,GID8,DCPS,LIG3,SP4,KLF11,CIZ1,ZSCAN10,TFAP2C,RUNX1T1,SLC7A14,TENM1,ZNF554,EGR1,MAPK4,OAS2,ETV4,BCL9,PDK3,RPS6,LSM11,IRF2BP2,KLF15,PHLDA1,IKZF4,A1CF,EMX1,NAT10,KLF3,OAS1,ETV5,GRIK5,GPR63,TLE3,HEYL,HRAS,GLI3,MYC,RPRD2,IRS1,RPS28,KLF9,PODXL,MNT,NUP205,FOSL2,NR1D1,DUSP4,SMCR8,KLF6,PBX1,RPL18,ABCG2,NHEJ1,PDK2,SELENBP1,STAT1,HSPA2,FBXO32,NR0B2,NHS,SYVN1,TCF7L2,TMUB1,HELZ2,SMAD1,TP53,ELK1,SUN2,PTBP1,PRKACA,BACH2,ETS1,CMPK2,C17ORF49,ZNF326,SAE1,PKN1,TUT1,YBX1,PRPF8,WDC1,MAML1,CRNKL1,NFIB,MAPK3,CNDP2,SERTAD2,FOXK1,CAMSAP3,FAM193B,ZFX3,SMURF1,RPS15,PRMT6,TRIM24,ETV6,WDR74,BCOR,URB1,STUB1,NPAS2,USP1,TCOF1,NCL,FKBP5,RBM22,METTL14,MZT2B,ATF7IP,POLR1D,FIGN,HSP90AA1,BTG1,S1PR1,THRB,UTP14A,CRTC3,MED25,CASC3,TNKS,SF3A1,SIAH2,ACD,NFKBIA,ARHGAP17,GJA1,RNPS1,SLC35C2,SQSTM1,DEAF1,INSR,RPL19,NR1D2,SP2,SLC2A4RG,MRPS18B,NEDD9,BAZ2A,CCDC86,GID8,DCPS,LIG3,SP4,KLF11,CIZ1</p> |
| GO:0005515 | MF | protein binding | 0.010406822 | 1.982681882 | 384 | <p>CRNN,CGA,FGA,IGF2,KRT6A,FGB,LCE3D,SLC6A15,APOA5,SPRR3,FLG,SLITRK6,FGF21,FGG,TBX22,CALCR,SPRR1A,ABCB11,USH2A,OTX2,HBM,DCC,POTED,KCP,RGPD3,NOG,STAR,KRT16,HSFX2,IL1RN,ZSCAN10,SHISA2,TACR1,AQP5,SYNDIG1,TFAP2C,ERRF1,TMEM174,CNTNAP4,PLP1,RUNX1T1,ALOX12,KRT13,SLC7A14,SPRR2E,PDK4,TENM1,PRLHR,SLC22A11,PEMT,LY6H,TMEM236,FAP,EYA4,BTBD11,FBP2,LCE3E,ZNF554,EGRI,CSGALNACT1,MT2A</p>                                                                                                                                                                                                                                                                                                                                                                                                                                                                                                                                                                                                                                                                                                                                     |

,MAL,SLC38A4,GCG,ASIC  
1,ADAMTS8,PTGER4,TM  
EM201,COL6A3,MAPK4,O  
AS2,AQP7,SLC25A48,ETV  
4,MAOB,GPC6,KCNJ2,MT  
1E,SOCS5,GMNC,BCL9,P  
DK3,ABCC9,POU6F2,BTG  
2,CST6,PRR15,VEGFC,FA  
M20C,C16ORF89,TMEM17  
6A,KLK13,RPS6,ID3,PGAP  
2,ALOXE3,LSM11,BCAP3  
1,DDIT4,DPP4,TYSND1,K  
LF15,RNF165,AQP8,SLC22  
A17,PHLDA1,FAM86B2,L  
TBP4,IKZF4,CREB3L1,A1  
CF,EMX1,NAT10,NETO2,  
ACSL6,KLF3,ZFP36,QDPR  
,OAS1,ETV5,GRIK5,KL,Z  
NF385C,GADD45B,SLC29  
A3,CGREF1,TLE3,RPL8,H  
EYL,PER3,HRAS,GLI3,W  
DR89,KIAA0408,SFTPD,M  
YC,TTI1,IFIT3,IGSF8,RPR  
D2,DMD,AQP12B,FKBP8,I  
RS1,KIAA1958,RPS28,TM  
EM140,MUC6,MTCH1,AB  
HD15,EIF4B,KLF10,PODX  
L,BVES,GLTP,MNT,CEL,  
NUP205,FOSL2,SLC1A5,W  
ASF1,PAPSS2,TMCO4,NR  
1D1,DUSP4,SNX19,SMCR  
8,FECH,FOXN3,IL6ST,IL6  
R,PCDHB6,ZNF581,KLF6,  
CPA1,ABCA1,ZFP36L1,PB  
X1,DYSF,SH3RF1,PLEKH  
G6,URM1,ERN1,RPL18,C  
NTN3,CYGB,RNF24,ABC  
G2,PRRC1,NHEJ1,PKK2,B  
OC,SELENBP1,STAT1,HS  
PA2,DUSP1,DIP2B,FMOD,  
MYADM,ARPC1A,KCTD1  
2,APOD,GLS,FBXO32,SR  
M,DIRAS3,NR0B2,SYVN1,  
ARL6IP1,TCF7L2,TMUB1,  
DHRS11,DLL4,HELZ2,SM  
AD1,TP53,PCDH18,ELK1,  
SUN2,TMEM150A,PTBP1,  
SOS1,PRKACA,BACH2,T  
OR2A,EGFR,ETS1,PIK3CA  
,ZNR1,C17ORF49,GUK1,  
ZNF326,GCNT2,SAE1,GTP  
BP8,PKN1,TNFRSF1A,EL  
OVL1,TUT1,NCSTN,MFA  
P2,YBX1,PPP1R3B,PLCE1,  
NDST1,KCNJ8,ATF6B,GA  
MT,DGCR2,TPI1,JMJD8,N  
ES,CDC42EP3,SECISBP2L,  
PRPF8,DNAJC4,EIF3B,EP  
HX1,WDTIC1,MAML1,CR  
NKL1,MAPK3,RPL18A,FA  
M83B,SERTAD2,FOXK1,Z  
NF646,CAMSAP3,ACVR2  
B,ATXN7L1,LRR8B,PLO  
D3,FAM193B,ZFH3,SMU  
RF1,AOX1,RPS15,PRMT6,  
TRIM24,PRKCSH,ETV6,G  
SK3A,WDR74,KCNC4,LA  
RP6,BCOR,PSD4,RAB4A,Z  
NF341,SGTA,STUB1,SLC3  
5E1,NPAS2,MAOA,USP1,

|                             |    |                                  |             |             |     |                                                                                                                                                                                                                                                                                                                                                                                                                                                                                                                                                                                                                                                                                                                                                                                                                                                                                                                                                                                                       |
|-----------------------------|----|----------------------------------|-------------|-------------|-----|-------------------------------------------------------------------------------------------------------------------------------------------------------------------------------------------------------------------------------------------------------------------------------------------------------------------------------------------------------------------------------------------------------------------------------------------------------------------------------------------------------------------------------------------------------------------------------------------------------------------------------------------------------------------------------------------------------------------------------------------------------------------------------------------------------------------------------------------------------------------------------------------------------------------------------------------------------------------------------------------------------|
| GO:0140110                  | MF | transcription regulator activity | 0.019982707 | 1.699345683 | 71  | RBM47,RNF43,KIAA0930,SHISA5,TCOF1,NCL,FKBP5,RBM22,SLC48A1,TRAPPC3,METTL14,MZT2B,ATF7IP,RWDD2B,POLR1D,UBIAD1,SFXN2,FIGN,UBAP2,UBE2E2,MX1,SPPL3,KCTD11,HSP90AA1,BTG1,GAB1,PXMP2,S1PR1,THRB,UTP14A,EDNRB,CRTC3,SYBU,MED25,ERP29,RBM23,CDNF,RNASEK,CASC3,MTMR3,TNKS,SF3A1,CHID1,AGPAT3,MEX3C,SIAH2,ACD,NFKBIA,CDC42EP4,ARHGAP17,GJA1,RNPS1,ATP13A2,ZSWIM3,TXNDC5,PPFIBP2,MRPL49,SLC35C2,CD34,SQSTM1,DEAF1,CPNE8,INSR,RPL19,NR1D2,AGBL5,SP2,YIPF3,MRPS18B,NEDD9,GADD45G,ZNRF3,MAST3,SNX12,TMED5,BAZ2A,CCDC86,MOAT7,GID8,DCPS,LIG3,BSG,SP4,KLF11,CIZ1,LNX1,RALB,BTF3,NET1,TBX22,OTX2,HSFX2,ZSCAN10,TFAP2C,RUNX1T1,ZNF554,EGR1,ETV4,BCL9,POU6F2,BTG2,IRF2BP2,KLF15,EGR3,IKZF4,CREB3L1,EMX1,KLF3,ETV5,TLE3,HEYL,GLI3,MYC,ZNF416,DBP,KLF9,KLF10,MNT,FOSL2,ZNF362,NR1D1,FOXN3,ZNF581,KLF6,PBX1,STAT1,NROB2,TCF7L2,HELLZ,SMAD1,TP53,ELK1,BACH2,ETS1,TSHZ1,MED13L,PKN1,ATF6B,MAML1,NFIB,SERTAD2,FOKK1,ZNF646,ZFHX3,TRIM24,ETV6,BCOR,ZNF341,NPAS2,ATF7IP,BTG1,THRB,SIAH2,DEAF1,NR1D2,SP2,SLC2A4RG,SP4,KLF11,ZNF836 |
| <b>Down regulated genes</b> |    |                                  |             |             |     |                                                                                                                                                                                                                                                                                                                                                                                                                                                                                                                                                                                                                                                                                                                                                                                                                                                                                                                                                                                                       |
| GO:0051606                  | BP | detection of stimulus            | 9.55E-21    | 20.01997014 | 63  | DMBT1,OR10J3,OR4F5,OR6C74,OR5L1,OR4D2,OR2T33,OR2T6,GJA10,OR8H2,OR4N2,CASQ2,OR2A25,TAS2R7,OR1E2,OR2B3,OR6N1,OR4K5,OR4A5,OR5AN1,OR5AS1,OR13G1,OR2M5,OR13C5,OR4C3,OR52L1,OR8K1,OR6B2,OR56A4,OR5B17,OR51A2,OR5T1,OR1A1,OR13C8,OR13C2,OR51B4,OR2AG2,OR2M7,OR51L1,OR5H1,OR8G1,OR6K6,OR10Z1,OR4K1,OR5T2,OR2A12,OR1L8,OR1J2,TAS2R60,CHRNA10,OR5AP2,OR52K1,OR9A2,OR10A5,OR4C46,OR52W1,TAS2R8,OR52E6,TTN,OR6K3,OR11H2,OR52D1,PKDREJIAPP,HAPLN4,ADCYAP1,DMBT1,RGS16,PREX1,NR                                                                                                                                                                                                                                                                                                                                                                                                                                                                                                                                     |
| GO:0032501                  | BP | multicellular organismal process | 3.26E-07    | 6.486491268 | 224 |                                                                                                                                                                                                                                                                                                                                                                                                                                                                                                                                                                                                                                                                                                                                                                                                                                                                                                                                                                                                       |

G3,LRRTM3,GABRA2,GT  
SF1,NTNG2,GLRA1,DGK  
G,ISX,OR10J3,SLC6A17,D  
ACH2,IFNA16,OR4F5,SLC  
18A2,KLHL1,OR6C74,DK  
K4,UNC5A,OR5L1,OR4D2,  
OR2T33,OR2T6,CDHR1,GJ  
A10,BMP5,OR8H2,INSRR,  
POSTN,OR4N2,CASQ2,OR  
2A25,CYP24A1,TAS2R7,O  
R1E2,OR2B3,SLC45A3,IF  
NA10,LRRC10,GREM2,OR  
6N1,CAPN8,TFF3,OR4K5,  
HOPX,COMP,OR4A5,OR5  
AN1,KRTAP1-  
3,OR5A51,GABRR2,OR13  
G1,OR2M5,HTR3A,KRTA  
P13-  
3,OR13C5,OR4C3,CHST8,  
MAS1,OR52L1,KRTAP4-  
2,OR8K1,KIRREL3,OR6B2  
,KRTAP19-1,KRTAP3-  
1,KRTAP3-2,KRTAP9-  
9,OR56A4,PSMA6,OR5B17  
,TMEM108,OR51A2,P2RX  
5,OR5T1,OR1A1,OR13C8,  
OR13C2,GAP43,MFAP5,A  
DAMTSL1,OR51B4,LCE1F  
,KCNQ2,SFRP4,OR2AG2,  
OR2M7,OR51L1,OR5H1,C  
RLF1,KRTAP21-  
2,OR8G1,OR6K6,KRTAP1  
9-2,OR10Z1,KRTAP10-  
1,DNAH11,NPTX2,OR4K1,  
OR5T2,EDARADD,PI16,JP  
H2,INSC,FN1,ACTBL2,C1  
QL1,NPFF,OR2A12,BEND  
6,OR1L8,HBD,OR1J2,TAS  
2R60,VSIG4,IGF2BP3,CHR  
NA10,OR5AP2,OR52K1,C  
YP26B1,FAT3,IL10,TNFRS  
F11A,GCGR,OR9A2,LCN2,  
TOP2A,MESP2,CDH22,OR  
10A5,OR4C46,UCHL1,FGL  
1,ACTC1,VASP,CIT,CTNN  
A3,OR52W1,IL5RA,SOST  
DC1,TTC8,RADIL,TAS2R8  
,NTN1,OR52E6,P2RX6,CT  
NNA2,TTN,OR6K3,MUST  
N1,OR11H2,CCR2,P2RY12  
,CNN1,HRC,PTGS2,DEF8,  
APOC1,LYZ,GLP1R,NDR  
G4,CNGA4,APOC2,KRTA  
P5-  
1,HADH,SERPINA3,OR52  
D1,TMEM178A,EFNA4,PI  
R,HSD17B3,PTGFR,SCRG  
1,NR6A1,LGI2,AKR1C2,C  
DH23,ADAMTS2,P2RY1,I  
GSF11,TSHZ3,PDLIM3,CR  
YGS,KIF20B,ESR1,ARHG  
AP22,AGAP2,CYP4F12,SL  
C26A7,TFCP2L1,RELT,M  
AP1A,LOXL1,KIF18A,PRI  
CKLE4,JMJD6,ARG2,POU  
5F1,ROBO1,ALOX5,ANLN  
,CDK1,SELPLG,GREB1,M  
YH11,ABCB1,CYP2J2,VA  
V3,TYMS,SCN1B,MATN3,  
LAMB3,SRD5A1,SRPX2,S



|            |    |                 |          |             |     |                                                                                                                                                                                                                                                                                                                                                                                                                                                                                                                                                                                                                                                                                                                                                                                                                                                                                                                                                                                                                                                                                                                                                                                                                                                                                                                                                                                                                                                               |
|------------|----|-----------------|----------|-------------|-----|---------------------------------------------------------------------------------------------------------------------------------------------------------------------------------------------------------------------------------------------------------------------------------------------------------------------------------------------------------------------------------------------------------------------------------------------------------------------------------------------------------------------------------------------------------------------------------------------------------------------------------------------------------------------------------------------------------------------------------------------------------------------------------------------------------------------------------------------------------------------------------------------------------------------------------------------------------------------------------------------------------------------------------------------------------------------------------------------------------------------------------------------------------------------------------------------------------------------------------------------------------------------------------------------------------------------------------------------------------------------------------------------------------------------------------------------------------------|
| GO:0071944 | CC | cell periphery  | 1.40E-07 | 6.853891822 | 186 | GIP1, GLG1, TPM2, SIX2, SAMHD1<br>HAPLN4, CSNK1G1, IGLL5, PLCH2, SLC01A2, DMBT1, RGS16, PREX1, LRFN2, NRG3, LRRTM3, GABRA2, NTNG2, GLRA1, DGKG, OR10J3, SLC6A17, OR4F5, SLC18A2, SLC26A9, OR6C74, UNC5A, OR5L1, OR4D2, KCNG3, SLC27A6, OR2T33, CLDN25, OR2T6, ADAM30, CDHR1, GJA10, RASD1, TAAR9, OR8H2, INSRR, POSTN, OR4N2, OR2A25, LY6G6E, TAS2R7, KIF20A, OR1E2, OR2B3, SLC45A3, OR6N1, OR4K5, COMP, OR4A5, OR5AN1, OR5AS1, GABRR2, OR13G1, OR2M5, HTR3A, OR13C5, OR4C3, MAS1, OR52L1, OR8K1, KIRREL3, OR6B2, SLC05A1, OR56A4, OR5B17, PCDH7, OR51A2, P2RX5, SLC22A9, OR5T1, OR1A1, OR13C8, OR13C2, GAP43, MFAP5, ADAMTSL1, OR51B4, KCNQ2, KCNF1, OR2AG2, CD1E, OR2M7, OR51L1, OR5H1, CRLF1, OR8G1, OR6K6, OR10Z1, KCNH1, OR4K1, OR5T2, SDR16C5, JPH2, INSC, FN1, OR2A12, CAPNS2, YIPF4, OR1L8, OR1J2, TAS2R60, CHRNA10, OR5AP2, MEP1B, OR52K1, FAT3, TNFRSF11A, GCGR, OR9A2, ENTPD3, OXGR1, CDH22, OR10A5, OR4C46, UCHL1, HLA-C, CLEC4D, FGL1, VASP, OR52W1, IL5RA, TTC8, TAS2R8, OLFM4, TSPAN1, GPR141, NTN1, OR52E6, P2RX6, CTNNA2, TTN, OR6K3, OR11H2, CCR2, PRAM1, P2RY12, PTGS2, ITGBL1, GLP1R, NDRG4, KLRK1, CNGA4, SERPINA3, OR52D1, EFNA4, PTGFR, CFB, FCHO1, LRRC7, MMP28, CDH23, ADAMTS2, ATP2C1, P2RY1, IGSF11, TSHZ3, FRMPD1, SELL, ESR1, CYP4F12, RASD2, SLC26A7, LY6G5B, CSF2RA, RELT, LOXL1, KIF18A, B3GNT3, MYO1F, JMJD6, ROBO1, ANLN, SELPLG, ABCB1, DLG2, ADAMTS10, VAV3, SCN1B, LAT, MATN3, LAMB3, SRPX2, SGIP1, SLC7A7, GLG1, SAMHD1 |
| GO:0005886 | CC | plasma membrane | 9.39E-07 | 6.027126436 | 171 | CSNK1G1, IGLL5, PLCH2, SLC01A2, RGS16, PREX1, LRFN2, NRG3, LRRTM3, GABRA2, NTNG2, GLRA1, DGKG, OR10J3, SLC6A17, OR4F5, SLC18A2, SLC26A9, OR6C74, UNC5A, OR5L1, OR4D2, KCNG3, SLC27A6, OR2T33, CLDN25, OR2T6, ADA                                                                                                                                                                                                                                                                                                                                                                                                                                                                                                                                                                                                                                                                                                                                                                                                                                                                                                                                                                                                                                                                                                                                                                                                                                              |

|            |    |                                           |          |            |    |                                                                                                                                                                                                                                                                                                                                                                                                                                                                                                                                                                                                                                                                                                                                                                                                                                                                                                                                                                                                                                                                                                                                                                                                                                                                                                                                                                                                                                                                                          |
|------------|----|-------------------------------------------|----------|------------|----|------------------------------------------------------------------------------------------------------------------------------------------------------------------------------------------------------------------------------------------------------------------------------------------------------------------------------------------------------------------------------------------------------------------------------------------------------------------------------------------------------------------------------------------------------------------------------------------------------------------------------------------------------------------------------------------------------------------------------------------------------------------------------------------------------------------------------------------------------------------------------------------------------------------------------------------------------------------------------------------------------------------------------------------------------------------------------------------------------------------------------------------------------------------------------------------------------------------------------------------------------------------------------------------------------------------------------------------------------------------------------------------------------------------------------------------------------------------------------------------|
| GO:0004888 | MF | transmembrane signaling receptor activity | 4.64E-19 | 18.3338049 | 83 | <p>M30,CDHR1,GJA10,RASD1,TAAR9,OR8H2,INSRR,OR4N2,OR2A25,LY6G6E,TAS2R7,KIF20A,OR1E2,OR2B3,SLC45A3,OR6N1,OR4K5,OR4A5,OR5AN1,OR5AS1,GABRR2,OR13G1,OR2M5,HTR3A,OR13C5,OR4C3,MAS1,OR52L1,OR8K1,KIRREL3,OR6B2,SLCO5A1,OR56A4,OR5B17,PCDH7,OR51A2,P2RX5,SLC22A9,OR5T1,OR1A1,OR13C8,OR13C2,GAP43,ADAMTSL1,OR51B4,KCNQ2,KCNF1,OR2AG2,CD1E,OR2M7,OR51L1,OR5H1,CRLF1,OR8G1,OR6K6,OR10Z1,KCNH1,OR4K1,OR5T2,SDR16C5,JPH2,INSC,FN1,OR2A12,CAPNS2,YIPF4,OR1L8,OR1J2,TAS2R60,CHRNA10,OR5AP2,MEP1B,OR52K1,FAT3,TNFRSF11A,GCGR,OR9A2,ENTPD3,OXGR1,CDH2,OR10A5,OR4C46,UCHL1,HLA-C,CLEC4D,VASP,OR52W1,IL5RA,TTC8,TAS2R8,OLFM4,TSPAN1,GPR141,OR52E6,P2RX6,CTNNA2,TTN,OR6K3,OR11H2,CCR2,PRA M1,P2RY12,PTGS2,ITGBL1,GLP1R,NDRG4,KLRK1,CNGA4,OR52D1,EFNA4,PTGFR,CFB,FCHO1,LRRC7,CDH23,ATP2C1,P2RY1,IGSF11,TSHZ3,FRMPD1,SEL L,ESR1,CYP4F12,RASD2,SLC26A7,LY6G5B,CSF2RA,RELT,KIF18A,B3GNT3,MYO1F,JMJD6,ROBO1,SELPLG,ABCB1,DLG2,VAV3,SCN1B,LAT,SRPX2,SGIP1,SLC7A7,GLG1,SAMHD1,GABRA2,GLRA1,OR10J3,OR4F5,OR6C74,UNC5A,OR5L1,OR4D2,OR2T33,OR2T6,TAAR9,OR8H2,INSRR,OR4N2,OR2A25,TAS2R7,OR1E2,OR2B3,OR6N1,OR4K5,OR4A5,OR5AN1,OR5AS1,GABRR2,OR13G1,OR2M5,HTR3A,OR13C5,OR4C3,MAS1,OR52L1,OR8K1,OR6B2,OR56A4,OR5B17,OR51A2,P2RX5,OR5T1,OR1A1,OR13C8,OR13C2,OR51B4,OR2AG2,OR2M7,OR51L1,OR5H1,CRLF1,OR8G1,OR6K6,OR10Z1,OR4K1,OR5T2,OR2A12,OR1L8,OR1J2,TAS2R60,CHRNA10,OR5AP2,OR52K1,TNFRSF11A,GCGR,OR9A2,OXGR1,OR10A5,OR4C46,OR52W1,IL5RA,SOSTDC1,TAS2R8,GPR141,OR52E6,P2RX6,OR6K3,OR11H2,CCR2,P2RY12,GLP1R,OR52D1,EFNA4</p> |
|------------|----|-------------------------------------------|----------|------------|----|------------------------------------------------------------------------------------------------------------------------------------------------------------------------------------------------------------------------------------------------------------------------------------------------------------------------------------------------------------------------------------------------------------------------------------------------------------------------------------------------------------------------------------------------------------------------------------------------------------------------------------------------------------------------------------------------------------------------------------------------------------------------------------------------------------------------------------------------------------------------------------------------------------------------------------------------------------------------------------------------------------------------------------------------------------------------------------------------------------------------------------------------------------------------------------------------------------------------------------------------------------------------------------------------------------------------------------------------------------------------------------------------------------------------------------------------------------------------------------------|

|            |    |                               |          |             |    |                                                                                                                                                                                                                                                                                                                                                                                                                                                                                                                                                                                                                                                                                                                                     |
|------------|----|-------------------------------|----------|-------------|----|-------------------------------------------------------------------------------------------------------------------------------------------------------------------------------------------------------------------------------------------------------------------------------------------------------------------------------------------------------------------------------------------------------------------------------------------------------------------------------------------------------------------------------------------------------------------------------------------------------------------------------------------------------------------------------------------------------------------------------------|
| GO:0060089 | MF | molecular transducer activity | 2.72E-18 | 17.56616903 | 88 | ,PTGFR,P2RY1,CSF2RA,R<br>OBO1<br>DMBT1,GABRA2,GLRA1,<br>OR10J3,RXRG,OR4F5,OR6<br>C74,UNC5A,OR5L1,OR4D<br>2,OR2T33,OR2T6,TAAR9,<br>OR8H2,INSRR,OR4N2,OR<br>2A25,TAS2R7,OR1E2,OR2<br>B3,OR6N1,OR4K5,OR4A5,<br>OR5AN1,OR5AS1,GABRR<br>2,OR13G1,OR2M5,HTR3A,<br>OR13C5,OR4C3,MAS1,OR<br>52L1,OR8K1,OR6B2,OR56<br>A4,OR5B17,OR51A2,P2RX<br>5,OR5T1,OR1A1,OR13C8,<br>OR13C2,OR51B4,OR2AG2,<br>OR2M7,OR51L1,OR5H1,C<br>RLF1,OR8G1,OR6K6,OR10<br>Z1,OR4K1,OR5T2,OR2A12<br>,OR1L8,OR1J2,TAS2R60,C<br>HRNA10,OR5AP2,OR52K1<br>,TNFRSF11A,GCGR,OR9A<br>2,OXGR1,OR10A5,OR4C4<br>6,OR52W1,IL5RA,SOSTD<br>C1,TAS2R8,GPR141,OR52<br>E6,P2RX6,OR6K3,OR11H2<br>,CCR2,P2RY12,GLP1R,KL<br>RK1,OR52D1,EFNA4,PTG<br>FR,P2RY1,ESR1,CSF2RA,J<br>MJD6,ROBO1 |
|------------|----|-------------------------------|----------|-------------|----|-------------------------------------------------------------------------------------------------------------------------------------------------------------------------------------------------------------------------------------------------------------------------------------------------------------------------------------------------------------------------------------------------------------------------------------------------------------------------------------------------------------------------------------------------------------------------------------------------------------------------------------------------------------------------------------------------------------------------------------|

**Table 4** The enriched pathway terms of the up and down regulated differentially expressed genes

| Pathway ID                | Pathway Name                                                                     | Adjusted p value | Negative log <sub>10</sub> of adjusted p value | Gene Count | Gene                                                                                                                                                                                                                                                                                                                                                                                                                        |
|---------------------------|----------------------------------------------------------------------------------|------------------|------------------------------------------------|------------|-----------------------------------------------------------------------------------------------------------------------------------------------------------------------------------------------------------------------------------------------------------------------------------------------------------------------------------------------------------------------------------------------------------------------------|
| <b>Up regulated genes</b> |                                                                                  |                  |                                                |            |                                                                                                                                                                                                                                                                                                                                                                                                                             |
| REAC:R-HSA-5663202        | Diseases of signal transduction by growth factor receptors and second messengers | 0.002918856      | 2.534787284                                    | 25         | FGA, FGB, FGG, HEYL, HRAS, MYC, IRS1, KIAA1549, STAT1, SYVN1, TCF7L2, DLL4, SOS1, EGFR, PIK3CA, NCSTN, MAML1, MAPK3, TRIM24, ETV6, GSK3A, RNF43, HSP90AA1, GAB1, TNKS                                                                                                                                                                                                                                                       |
| REAC:R-HSA-6809371        | Formation of the cornified envelope                                              | 0.009712336      | 2.012676308                                    | 12         | KRT6A, LCE3D, SPRR3, FLG, SPRR2D, SPRR1B, SPRR1A, KRT16, KRT13, SPRR2E, LCE3E, KLK13                                                                                                                                                                                                                                                                                                                                        |
| REAC:R-HSA-156827         | l13a-mediated translational silencing of Ceruloplasmin expression                | 0.027095018      | 1.567110554                                    | 10         | RPS6, RPL8, RPS28, EIF4B, RPL18, EIF3B, RPL18A, RPS15, RPL39, RPL19                                                                                                                                                                                                                                                                                                                                                         |
| REAC:R-HSA-1643685        | Disease                                                                          | 0.027095018      | 1.567110554                                    | 60         | CGA, FGA, FGB, FGG, CALCR, ABCB11, MUC21, GCG, ADAMTS8, PTGER4, GPC6, ABCC9, RPS6, SLC29A3, RPL8, HEYL, HRAS, SFTPD, MYC, IRS1, RPS28, MUC6, NUP205, WASF1, PAPSS2, KIAA1549, IL6R, ABCA1, RPL18, STAT1, FMOD, ARPC1A, SYVN1, TCF7L2, DLL4, ELK1, SOS1, PRKACA, EGFR, PIK3CA, NCSTN, MAML1, MAPK3, RPL18A, RPS15, TRIM24, PRKCSH, ETV6, GSK3A, MAOA, RNF43, HSP90AA1, GAB1, S1PR1, RPL39, TNKS, NFKBIA, RPL19, SLC39A4, BSG |
| REAC:R-HSA-9006934        | Signaling by Receptor Tyrosine Kinases                                           | 0.03209698       | 1.493535827                                    | 25         | IGF2, EGR1, COL6A3, VEGFC, ID3, EGR3, HRAS, IRS1, WASF1, DUSP4, STAT1, ELK1, PTBP1, SOS1, PRKACA, EGFR, PIK3CA, NCSTN, MAPK3, RAB4A, STUB1, HSP90AA1, GAB1,                                                                                                                                                                                                                                                                 |

|                             |                               |             |             |    |                                                                                                                                                                                                                                                                                                                                                                                                                                                                                                        |
|-----------------------------|-------------------------------|-------------|-------------|----|--------------------------------------------------------------------------------------------------------------------------------------------------------------------------------------------------------------------------------------------------------------------------------------------------------------------------------------------------------------------------------------------------------------------------------------------------------------------------------------------------------|
| REAC:R-HSA-1266738          | Developmental Biology         | 0.032172975 | 1.492508778 | 45 | INSR,RALB<br>KRT6A,LCE3D,SPRR3,FLG,SPRR2D,SPRR1B,SPRR1A,DCC,KRT16,ZSCAN10,KRT13,SPRR2E,LCE3E,COL6A3,MPZ,KLK13,RPS6,RPL8,HRAS,MYC,RPS28,IL6R,PBX1,RPL18,ARPC1A,HELZ2,SOS1,PRKACA,EGFR,PIK3CA,MED13L,NCSTN,MAML1,MAPK3,RPL18A,ACVR2B,RPS15,HSP90AA1,GA B1,RPL39,MED25,CASC3,SIAH2,RNPS1,RPL19                                                                                                                                                                                                            |
| <b>Down regulated genes</b> |                               |             |             |    |                                                                                                                                                                                                                                                                                                                                                                                                                                                                                                        |
| REAC:R-HSA-381753           | Olfactory Signaling Pathway   | 4.32E-23    | 22.36427935 | 54 | OR10J3,OR4F5,OR6C74,OR5L1,OR4D2,OR2T33,OR2T6,OR8H2,OR4N2,OR2A25,OR1E2,OR2B3,OR6N1,OR4K5,OR4A5,OR5AN1,OR5AS1,OR13G1,OR2M5,OR13C5,OR4C3,OR52L1,OR8K1,OR6B2,OR56A4,OR5B17,OR51A2,OR5T1,OR1A1,OR13C8,OR13C2,OR51B4,OR2AG2,OR2M7,OR51L1,OR5H1,OR8G1,OR6K6,OR10Z1,OR4K1,OR5T2,OR2A12,OR1L8,OR1J2,OR5AP2,OR52K1,OR9A2,OR10A5,OR4C46,OR52W1,OR52E6,OR6K3,OR11H2,OR52D1                                                                                                                                         |
| REAC:R-HSA-9709957          | Sensory Perception            | 4.85E-21    | 20.31389969 | 57 | OR10J3,OR4F5,OR6C74,OR5L1,OR4D2,OR2T33,OR2T6,OR8H2,OR4N2,OR2A25,OR1E2,OR2B3,OR6N1,OR4K5,OR4A5,OR5AN1,OR5AS1,OR13G1,OR2M5,OR13C5,OR4C3,OR52L1,OR8K1,OR6B2,OR56A4,OR5B17,OR51A2,OR5T1,OR1A1,OR13C8,OR13C2,OR51B4,OR2AG2,OR2M7,OR51L1,OR5H1,OR8G1,OR6K6,OR10Z1,OR4K1,OR5T2,OR2A12,OR1L8,RDH16,OR1J2,OR5AP2,OR52K1,OR9A2,OR10A5,OR4C46,OR52W1,OR52E6,OR6K3,BCO2,OR11H2,APOC2,OR52D1                                                                                                                        |
| REAC:R-HSA-418555           | G alpha (s) signalling events | 6.29E-20    | 19.20156126 | 58 | IAPP,ADCYAP1,OR10J3,OR4F5,OR6C74,OR5L1,OR4D2,OR2T33,OR2T6,TAAR9,OR8H2,OR4N2,OR2A25,OR1E2,OR2B3,OR6N1,OR4K5,OR4A5,OR5AN1,OR5AS1,OR13G1,OR2M5,OR13C5,OR4C3,OR52L1,OR8K1,OR6B2,OR56A4,OR5B17,OR51A2,OR5T1,OR1A1,OR13C8,OR13C2,OR51B4,OR2AG2,OR2M7,OR51L1,OR5H1,OR8G1,OR6K6,OR10Z1,OR4K1,OR5T2,OR2A12,OR1L8,OR1J2,OR5AP2,OR52K1,OR9A2,OR10A5,OR4C46,OR52W1,OR52E6,OR6K3,OR11H2,GLP1R,OR52D1                                                                                                                |
| REAC:R-HSA-388396           | GPCR downstream signalling    | 9.32E-15    | 14.0308131  | 76 | IAPP,ADCYAP1,RGS16,PREX1,DGKG,OR10J3,OR4F5,OR6C74,OR5L1,OR4D2,ARHGFEF35,OR2T33,OR2T6,TAAR9,OR8H2,OR4N2,OR2A25,TAS2R7,OR1E2,OR2B3,OR6N1,OR4K5,OR4A5,OR5AN1,OR5AS1,OR13G1,OR2M5,OR13C5,OR4C3,OR52L1,OR8K1,OR6B2,OR56A4,OR5B17,OR51A2,OR5T1,OR1A1,OR13C8,OR13C2,OR51B4,OR2AG2,OR2M7,OR51L1,OR5H1,OR8G1,OR6K6,OR10Z1,OR4K1,OR5T2,NPFF,OR2A12,OR1L8,RDH16,OR1J2,TAS2R60,OR5AP2,OR52K1,OR9A2,OXGR1,OR10A5,OR4C46,OR52W1,TAS2R8,OR52E6,OR6K3,BCO2,OR11H2,CCR2,P2RY12,GLP1R,APOC2,OR52D1,PTGFR,P2RY1,PD1C,VAV3 |
| REAC:R-HSA-372790           | Signaling by GPCR             | 2.45E-13    | 12.61114695 | 76 | IAPP,ADCYAP1,RGS16,PREX1,DGKG,OR10J3,OR4F5,OR6C74,OR5L1,OR4D2,ARHGFEF35,OR2T33,OR2T6,TAAR9,OR8H2,                                                                                                                                                                                                                                                                                                                                                                                                      |

|                   |                     |             |             |     |                                                                                                                                                                                                                                                                                                                                                                                                                                                                                                                                                                                                                                                                                                                                                                                                                                                                                                                                                                                                                                                                                                                                                                                                                                                                     |
|-------------------|---------------------|-------------|-------------|-----|---------------------------------------------------------------------------------------------------------------------------------------------------------------------------------------------------------------------------------------------------------------------------------------------------------------------------------------------------------------------------------------------------------------------------------------------------------------------------------------------------------------------------------------------------------------------------------------------------------------------------------------------------------------------------------------------------------------------------------------------------------------------------------------------------------------------------------------------------------------------------------------------------------------------------------------------------------------------------------------------------------------------------------------------------------------------------------------------------------------------------------------------------------------------------------------------------------------------------------------------------------------------|
| REAC:R-HSA-162582 | Signal Transduction | 7.38146E-05 | 4.131857963 | 105 | OR4N2, OR2A25, TAS2R7, OR1E2, OR2B3, OR6N1, OR4K5, OR4A5, OR5AN1, OR5AS1, OR13G1, OR2M5, OR13C5, OR4C3, OR5L1, OR8K1, OR6B2, OR56A4, OR5B17, OR51A2, OR5T1, OR1A1, OR13C8, OR13C2, OR51B4, OR2AG2, OR2M7, OR51L1, OR5H1, OR8G1, OR6K6, OR10Z1, OR4K1, OR5T2, NPFF, OR2A12, OR1L8, RDH16, OR1J2, TAS2R60, OR5AP2, OR52K1, OR9A2, OXGR1, OR10A5, OR4C46, OR52W1, TAS2R8, OR52E6, OR6K3, BCO2, OR11H2, CCR2, P2RY12, GLP1R, APOC2, OR52D1, PTGFR, P2RY1, PDE1C, VAV3<br>IAPP, ADCYAP1, RGS16, PREX1, NRG3, DLK1, DGKG, OR10J3, RXRG, OR4F5, OR6C74, DKK4, OR5L1, OR4D2, ARHGEP35, OR2T33, OR2T6, TAAR9, OR8H2, OR4N2, OR2A25, TAS2R7, OR1E2, OR2B3, GREM2, OR6N1, TFF3, OR4K5, OR4A5, OR5AN1, OR5AS1, OR13G1, OR2M5, OR13C5, OR4C3, OR52L1, OR8K1, OR6B2, OR56A4, PSM6, DLGAP5, OR5B17, OR51A2, OR5T1, OR1A1, OR13C8, OR13C2, OR51B4, OR2AG2, OR2M7, OR51L1, OR5H1, OR8G1, OR6K6, OR10Z1, OR4K1, OR5T2, SDR16C5, FN1, NPFF, OR2A12, OR1L8, RDH16, OR1J2, TAS2R60, OR5AP2, OR52K1, CYP26B1, OR9A2, OXGR1, OR10A5, SPC24, OR4C46, CIT, OR52W1, IL5RA, TAS2R8, OR52E6, OR6K3, BCO2, OR11H2, CCR2, P2RY12, APOC1, GLP1R, APOC2, OR52D1, SMAD9, PTGFR, BUB1B, P2RY1, ARHGAP20, NEDD8, ESR1, ARHGAP22, CSF2RA, KIF18A, ARHGAP9, CDK1, GREB1, MYH11, PDE1C, DLG2, VAV3, LAMB3 |
|-------------------|---------------------|-------------|-------------|-----|---------------------------------------------------------------------------------------------------------------------------------------------------------------------------------------------------------------------------------------------------------------------------------------------------------------------------------------------------------------------------------------------------------------------------------------------------------------------------------------------------------------------------------------------------------------------------------------------------------------------------------------------------------------------------------------------------------------------------------------------------------------------------------------------------------------------------------------------------------------------------------------------------------------------------------------------------------------------------------------------------------------------------------------------------------------------------------------------------------------------------------------------------------------------------------------------------------------------------------------------------------------------|

**Table 5** Topology table for up and down regulated genes.

| Regulation | Node     | Degree | Betweenness | Stress   | Closeness |
|------------|----------|--------|-------------|----------|-----------|
| Up         | MYC      | 769    | 0.24506     | 1.04E+08 | 0.402932  |
| Up         | EGFR     | 469    | 0.138032    | 61812344 | 0.381322  |
| Up         | LNX1     | 301    | 0.098028    | 35639540 | 0.344753  |
| Up         | YBX1     | 242    | 0.052423    | 15440248 | 0.370488  |
| Up         | HSP90AA1 | 198    | 0.042012    | 18645766 | 0.349323  |
| Up         | RNPS1    | 148    | 0.029398    | 16186898 | 0.324119  |
| Up         | SGTA     | 139    | 0.039126    | 11319544 | 0.315439  |
| Up         | TNFRSF1A | 116    | 0.016842    | 8191032  | 0.328598  |
| Up         | SQSTM1   | 112    | 0.025913    | 6213766  | 0.344335  |
| Up         | MAST3    | 105    | 0.022       | 12287012 | 0.305669  |
| Up         | POU6F2   | 99     | 0.028224    | 4939174  | 0.317338  |
| Up         | STUB1    | 95     | 0.01869     | 5557470  | 0.333856  |
| Up         | FKBP5    | 94     | 0.015263    | 3991284  | 0.329764  |
| Up         | PRMT6    | 82     | 0.023047    | 4016020  | 0.301486  |
| Up         | MAPK3    | 78     | 0.01798     | 4710364  | 0.312259  |
| Up         | SMAD1    | 77     | 0.014129    | 5216492  | 0.309237  |
| Up         | TFAP2C   | 77     | 0.020062    | 3309460  | 0.333573  |
| Up         | NCL      | 73     | 0.015947    | 5344646  | 0.374917  |
| Up         | ETS1     | 69     | 0.014065    | 3895426  | 0.310987  |
| Up         | MEX3C    | 68     | 0.003769    | 2594352  | 0.310439  |
| Up         | ACD      | 66     | 0.014094    | 3525238  | 0.307138  |
| Up         | NFKBIA   | 66     | 0.008138    | 4939524  | 0.310854  |
| Up         | GAB1     | 61     | 0.005759    | 2357788  | 0.296365  |
| Up         | ZNF581   | 58     | 0.008074    | 2392056  | 0.303509  |
| Up         | PRKACA   | 58     | 0.012141    | 2683394  | 0.312833  |
| Up         | KRT13    | 56     | 0.009539    | 2356276  | 0.31577   |
| Up         | SF3A1    | 54     | 0.005297    | 3631052  | 0.304231  |
| Up         | STAT1    | 54     | 0.010129    | 1749810  | 0.330531  |

|    |          |    |          |         |          |
|----|----------|----|----------|---------|----------|
| Up | ATF7IP   | 54 | 0.011319 | 2610676 | 0.297746 |
| Up | FOKK1    | 52 | 0.010322 | 2431366 | 0.309968 |
| Up | KRT16    | 52 | 0.009137 | 2768286 | 0.302646 |
| Up | RPS6     | 50 | 0.005709 | 1809230 | 0.323503 |
| Up | IFIT3    | 48 | 0.004333 | 1419676 | 0.307396 |
| Up | UBE2E2   | 48 | 0.009384 | 2778786 | 0.289714 |
| Up | PKN1     | 47 | 0.007325 | 2119206 | 0.29714  |
| Up | ARL6IP1  | 46 | 0.011853 | 5167578 | 0.284047 |
| Up | UTP14A   | 45 | 0.00788  | 1716012 | 0.322239 |
| Up | PRPF8    | 44 | 0.006824 | 1731078 | 0.329977 |
| Up | GADD45G  | 44 | 0.007648 | 1727574 | 0.29879  |
| Up | ATP13A2  | 43 | 0.011364 | 3235048 | 0.28605  |
| Up | HRAS     | 42 | 0.006113 | 1934688 | 0.306916 |
| Up | DCC      | 42 | 0.005613 | 2081812 | 0.292265 |
| Up | SUN2     | 42 | 0.004561 | 2137880 | 0.299806 |
| Up | DYSF     | 41 | 0.007116 | 2286238 | 0.293962 |
| Up | NCSTN    | 40 | 0.007729 | 5776106 | 0.274308 |
| Up | RPL8     | 37 | 0.004561 | 1421422 | 0.324922 |
| Up | BACH2    | 37 | 0.008838 | 2796552 | 0.273369 |
| Up | PIK3CA   | 37 | 0.005768 | 1280756 | 0.304576 |
| Up | PTBP1    | 36 | 0.003339 | 1190818 | 0.333507 |
| Up | FKBP8    | 35 | 0.00586  | 1371274 | 0.3223   |
| Up | NES      | 35 | 0.007013 | 1126640 | 0.295338 |
| Up | KRT6A    | 34 | 0.005784 | 1381296 | 0.320281 |
| Up | NUP205   | 33 | 0.005495 | 1090580 | 0.323442 |
| Up | FOXP1    | 33 | 0.006278 | 1144548 | 0.31992  |
| Up | INSR     | 33 | 0.003132 | 1562024 | 0.279757 |
| Up | BCAP31   | 32 | 0.00482  | 1838970 | 0.292131 |
| Up | BTF3     | 31 | 0.00454  | 1476600 | 0.290636 |
| Up | RPL18A   | 31 | 0.002498 | 754566  | 0.318306 |
| Up | KIAA0408 | 30 | 0.00425  | 1221042 | 0.302575 |
| Up | USP1     | 30 | 0.004591 | 2441058 | 0.280879 |
| Up | EIF3B    | 29 | 0.003846 | 916674  | 0.315848 |
| Up | HSPA2    | 28 | 0.002862 | 684442  | 0.313947 |
| Up | RPS28    | 28 | 0.002873 | 1278818 | 0.301718 |
| Up | SOS1     | 28 | 0.002513 | 879664  | 0.284205 |
| Up | ERRFI1   | 26 | 0.002199 | 611152  | 0.311214 |
| Up | LCE3E    | 26 | 0.001327 | 524110  | 0.25448  |
| Up | GSK3A    | 26 | 0.004252 | 1655588 | 0.292867 |
| Up | NAT10    | 26 | 0.001696 | 666842  | 0.325191 |
| Up | LIG3     | 26 | 0.00228  | 725644  | 0.294691 |
| Up | RPL18    | 25 | 9.73E-04 | 477540  | 0.322646 |
| Up | SLC1A5   | 25 | 0.004674 | 807018  | 0.306677 |
| Up | EIF4B    | 25 | 0.00188  | 620280  | 0.295594 |
| Up | NEDD9    | 24 | 0.003127 | 549922  | 0.289271 |
| Up | CASC3    | 23 | 0.002491 | 601190  | 0.302503 |
| Up | FOSL2    | 23 | 0.003682 | 831006  | 0.310911 |
| Up | SMURF1   | 22 | 0.002704 | 664080  | 0.284142 |
| Up | PLOD3    | 22 | 0.003554 | 1082282 | 0.335808 |
| Up | TCOF1    | 22 | 0.00218  | 501286  | 0.314295 |
| Up | ZNF326   | 22 | 0.001349 | 640724  | 0.29001  |
| Up | SP4      | 22 | 0.003993 | 853624  | 0.26749  |
| Up | EGR1     | 21 | 0.002422 | 466912  | 0.302056 |
| Up | MAGEA2   | 21 | 0.004402 | 1011862 | 0.293759 |
| Up | CREB3L1  | 21 | 0.006704 | 4786040 | 0.227129 |
| Up | WASF1    | 20 | 0.003044 | 1067564 | 0.274868 |
| Up | IRS1     | 20 | 0.001568 | 411892  | 0.309837 |
| Up | CRTC3    | 20 | 0.002135 | 967284  | 0.279558 |
| Up | FBP2     | 20 | 9.48E-04 | 423694  | 0.288846 |
| Up | MED25    | 20 | 0.001218 | 294794  | 0.275609 |
| Up | LCE3D    | 20 | 4.82E-04 | 304904  | 0.263329 |
| Up | DEAF1    | 19 | 0.002531 | 618844  | 0.3017   |
| Up | PDK3     | 19 | 0.003011 | 604606  | 0.307526 |
| Up | RPL19    | 19 | 6.37E-04 | 392064  | 0.319241 |
| Up | ABCA1    | 19 | 0.004473 | 1062228 | 0.298441 |
| Up | SAE1     | 19 | 0.003167 | 702666  | 0.299157 |
| Up | MAL      | 19 | 0.004533 | 1470896 | 0.264227 |
| Up | RAB4A    | 19 | 0.003857 | 747204  | 0.292398 |
| Up | RALB     | 19 | 0.001738 | 1634506 | 0.255536 |
| Up | TRAPPC3  | 19 | 0.005096 | 1890182 | 0.252046 |



|    |            |    |          |         |          |
|----|------------|----|----------|---------|----------|
| Up | DPP4       | 19 | 0.00527  | 1619646 | 0.234023 |
| Up | PRKCSH     | 18 | 0.002123 | 375070  | 0.316043 |
| Up | RBM22      | 18 | 0.002051 | 950490  | 0.283386 |
| Up | CAMSAP3    | 18 | 0.002085 | 1031300 | 0.274014 |
| Up | AK1        | 18 | 0.002632 | 1174620 | 0.257986 |
| Up | TTI1       | 17 | 0.001947 | 994560  | 0.275505 |
| Up | RUNX1T1    | 17 | 0.002454 | 1455104 | 0.275046 |
| Up | RPS15      | 16 | 0.00225  | 468552  | 0.316395 |
| Up | NR0B2      | 16 | 0.002709 | 597146  | 0.313581 |
| Up | POLR1D     | 16 | 0.001752 | 656232  | 0.282369 |
| Up | FAM83B     | 16 | 8.49E-04 | 301500  | 0.277314 |
| Up | PBX1       | 16 | 0.001944 | 703560  | 0.258718 |
| Up | TCF7L2     | 15 | 0.001345 | 373312  | 0.28326  |
| Up | BCOR       | 15 | 0.002336 | 806128  | 0.273164 |
| Up | ID3        | 15 | 0.002818 | 819716  | 0.269962 |
| Up | SLC35E1    | 15 | 0.003323 | 1409720 | 0.24654  |
| Up | TPI1       | 14 | 0.002071 | 457522  | 0.314391 |
| Up | SIAH2      | 14 | 0.001994 | 845214  | 0.269677 |
| Up | TNKS       | 14 | 0.002475 | 650184  | 0.251959 |
| Up | RBM23      | 14 | 2.87E-04 | 166572  | 0.276758 |
| Up | HEYL       | 14 | 0.002211 | 402860  | 0.280864 |
| Up | MRPL37     | 2  | 1.61E-04 | 51382   | 0.28108  |
| Up | GID8       | 2  | 4.01E-05 | 6218    | 0.246921 |
| Up | DIP2B      | 2  | 0        | 0       | 0.291299 |
| Up | SH3RF1     | 2  | 2.53E-04 | 99400   | 0.287919 |
| Up | ZFP36L1    | 2  | 9.45E-05 | 13940   | 0.255792 |
| Up | GCG        | 2  | 1.27E-04 | 41870   | 0.209131 |
| Up | YIPF3      | 2  | 7.28E-05 | 18416   | 0.211048 |
| Up | FGF        | 1  | 0        | 0       | 0.254404 |
| Up | FAM20C     | 1  | 0        | 0       | 0.254404 |
| Up | GLI3       | 1  | 0        | 0       | 0.236207 |
| Up | NXN        | 1  | 0        | 0       | 0.215614 |
| Up | PHLDA1     | 1  | 0        | 0       | 0.276071 |
| Up | SPRR1A     | 1  | 0        | 0       | 0.276071 |
| Up | DNAJC4     | 1  | 0        | 0       | 0.276071 |
| Up | MRPL49     | 1  | 0        | 0       | 0.270347 |
| Up | COL6A3     | 1  | 0        | 0       | 0.22719  |
| Up | MZT2B      | 1  | 0        | 0       | 0.287223 |
| Up | ZFHX3      | 1  | 0        | 0       | 0.287223 |
| Up | SNX19      | 1  | 0        | 0       | 0.287223 |
| Up | KLF10      | 1  | 0        | 0       | 0.287223 |
| Up | ST6GALNAC6 | 1  | 0        | 0       | 0.287223 |
| Up | RPRD2      | 1  | 0        | 0       | 0.287223 |
| Up | ETV6       | 1  | 0        | 0       | 0.287223 |
| Up | SYVN1      | 1  | 0        | 0       | 0.273764 |
| Up | SPRR2D     | 1  | 0        | 0       | 0.229084 |
| Up | FGF21      | 1  | 0        | 0       | 0.239809 |
| Up | TMEM174    | 1  | 0        | 0       | 0.239809 |
| Up | CYGB       | 1  | 0        | 0       | 0.222435 |
| Up | CRNN       | 1  | 0        | 0       | 0.256151 |
| Up | PLCE1      | 1  | 0        | 0       | 0.258901 |
| Up | SFTPD      | 1  | 0        | 0       | 0.201125 |
| Up | TRIM24     | 1  | 0        | 0       | 0.273179 |
| Up | APOD       | 1  | 0        | 0       | 0.273179 |
| Up | THRB       | 1  | 0        | 0       | 0.21607  |
| Up | IKZF4      | 1  | 0        | 0       | 0.23715  |
| Up | SPRR3      | 1  | 0        | 0       | 0.23715  |
| Up | CNTNAP4    | 1  | 0        | 0       | 0.23412  |
| Up | ZNRF1      | 1  | 0        | 0       | 0.224644 |
| Up | ATXN7L1    | 1  | 0        | 0       | 0.211048 |
| Up | FLG        | 1  | 0        | 0       | 0.219296 |
| Up | MT2A       | 1  | 0        | 0       | 0.250147 |
| Up | SHISA5     | 1  | 0        | 0       | 0.250147 |
| Up | RWDD2B     | 1  | 0        | 0       | 0.230063 |
| Up | OAS1       | 1  | 0        | 0       | 0.231658 |
| Up | TMED5      | 1  | 0        | 0       | 0.231658 |
| Up | NR1D2      | 1  | 0        | 0       | 0.231658 |
| Up | GPATCH4    | 1  | 0        | 0       | 0.228011 |
| Up | KLF11      | 1  | 0        | 0       | 0.217829 |
| Up | ZFP36      | 1  | 0        | 0       | 0.239696 |

|      |          |     |          |          |          |
|------|----------|-----|----------|----------|----------|
| Up   | MTMR3    | 1   | 0        | 0        | 0.239696 |
| Up   | FOXN3    | 1   | 0        | 0        | 0.239696 |
| Up   | PGAP2    | 1   | 0        | 0        | 0.221817 |
| Up   | ELK1     | 1   | 0        | 0        | 0.237967 |
| Up   | DUSP1    | 1   | 0        | 0        | 0.237967 |
| Up   | IL6ST    | 1   | 0        | 0        | 0.248433 |
| Up   | SNX12    | 1   | 0        | 0        | 0.221222 |
| Up   | LSM11    | 1   | 0        | 0        | 0.237183 |
| Up   | MED13L   | 1   | 0        | 0        | 0.232501 |
| Down | ESR1     | 448 | 0.115717 | 68567806 | 0.375827 |
| Down | FN1      | 445 | 0.130416 | 47618446 | 0.393806 |
| Down | TK1      | 155 | 0.044276 | 10622930 | 0.341187 |
| Down | ANLN     | 102 | 0.019831 | 5950428  | 0.327945 |
| Down | SMAD9    | 99  | 0.023512 | 10495428 | 0.31337  |
| Down | NEDD8    | 94  | 0.013216 | 4708022  | 0.323626 |
| Down | TTN      | 88  | 0.021791 | 4877390  | 0.354606 |
| Down | CDK1     | 76  | 0.019122 | 4123802  | 0.343387 |
| Down | KRTAP4-2 | 73  | 0.019925 | 3654538  | 0.300106 |
| Down | MED10    | 65  | 0.012717 | 3973710  | 0.302915 |
| Down | EXOSC8   | 61  | 0.015702 | 2371472  | 0.315244 |
| Down | NEK6     | 61  | 0.009473 | 2973110  | 0.31289  |
| Down | OIP5     | 60  | 0.013758 | 3810166  | 0.30688  |
| Down | PSMA6    | 57  | 0.012284 | 2937164  | 0.324778 |
| Down | BUB1B    | 54  | 0.010813 | 5323030  | 0.298111 |
| Down | FOXMI    | 43  | 0.007242 | 2131654  | 0.300317 |
| Down | RPL31    | 35  | 0.003717 | 1156016  | 0.323013 |
| Down | EEF1A2   | 33  | 0.002074 | 927396   | 0.307212 |
| Down | JMJD6    | 31  | 0.006976 | 4154054  | 0.261751 |
| Down | VASP     | 30  | 0.005691 | 1017020  | 0.316768 |
| Down | MAP3K8   | 30  | 0.001715 | 773154   | 0.310458 |
| Down | UCHL1    | 28  | 0.003224 | 905164   | 0.308808 |
| Down | TOP2A    | 28  | 0.0032   | 1042178  | 0.328788 |
| Down | MYH11    | 28  | 0.003406 | 1173838  | 0.305103 |
| Down | RASSF1   | 27  | 0.004112 | 1253252  | 0.299175 |
| Down | KRTAP3-2 | 27  | 0.004532 | 1398432  | 0.265421 |
| Down | TXNDC9   | 26  | 0.004126 | 1143166  | 0.278477 |
| Down | ACTC1    | 24  | 0.004063 | 1053202  | 0.329594 |
| Down | SPC24    | 23  | 0.002762 | 801496   | 0.268982 |
| Down | SH3BP2   | 21  | 0.001863 | 813564   | 0.277887 |
| Down | IGF2BP3  | 20  | 0.001318 | 388432   | 0.332401 |
| Down | KIF20A   | 20  | 0.004794 | 850452   | 0.262706 |
| Down | SFRP4    | 20  | 0.001565 | 724830   | 0.277404 |
| Down | KIF20B   | 18  | 0.003465 | 529620   | 0.306935 |
| Down | RASD1    | 18  | 0.001969 | 611526   | 0.282869 |
| Down | NEFM     | 18  | 0.002405 | 500776   | 0.29515  |
| Down | RADIL    | 18  | 0.001925 | 718708   | 0.28187  |
| Down | LCE1F    | 18  | 5.31E-04 | 1078996  | 0.215551 |
| Down | LUC7L    | 17  | 0.001779 | 331232   | 0.297175 |
| Down | LYZ      | 17  | 0.002823 | 462382   | 0.311441 |
| Down | PFKFB2   | 17  | 0.002624 | 984686   | 0.285029 |
| Down | ACTBL2   | 17  | 5.95E-04 | 248094   | 0.310647 |
| Down | FCHO1    | 17  | 0.002083 | 725112   | 0.267588 |
| Down | KIF18A   | 17  | 0.002914 | 1632588  | 0.264802 |
| Down | SAMHD1   | 16  | 0.002408 | 964652   | 0.269962 |
| Down | LAT      | 15  | 0.002067 | 607316   | 0.301593 |
| Down | PBK      | 15  | 0.002668 | 669380   | 0.294912 |
| Down | TPX2     | 15  | 9.04E-04 | 407858   | 0.293506 |
| Down | RRM2     | 15  | 0.002347 | 419566   | 0.272147 |
| Down | LAMB3    | 15  | 0.002279 | 1460718  | 0.265531 |
| Down | ALOX5    | 15  | 0.003126 | 496364   | 0.267099 |
| Down | TPM2     | 15  | 4.76E-04 | 162954   | 0.290092 |
| Down | IP6K3    | 14  | 0.001497 | 346042   | 0.275387 |
| Down | VAV3     | 14  | 0.001429 | 470180   | 0.297573 |
| Down | NDUFA8   | 13  | 0.00167  | 479156   | 0.290455 |
| Down | BIRC8    | 13  | 0.002152 | 927372   | 0.24679  |
| Down | DLG2     | 13  | 0.002105 | 767688   | 0.273896 |
| Down | MYCN     | 12  | 1.11E-04 | 41976    | 0.304939 |
| Down | PRAM1    | 12  | 0.001039 | 343780   | 0.260883 |
| Down | PCDH7    | 12  | 0.001704 | 788890   | 0.266375 |
| Down | EDARADD  | 11  | 0.001215 | 325252   | 0.268544 |

|      |           |    |          |        |          |
|------|-----------|----|----------|--------|----------|
| Down | GREB1     | 11 | 9.15E-04 | 206196 | 0.268968 |
| Down | ZNF622    | 11 | 8.30E-04 | 730808 | 0.269663 |
| Down | RXRG      | 11 | 0.002054 | 800986 | 0.250012 |
| Down | GLP1R     | 11 | 3.87E-04 | 306068 | 0.257778 |
| Down | TTC8      | 11 | 0.003532 | 958578 | 0.227362 |
| Down | SERPINA3  | 10 | 0.002011 | 543412 | 0.243151 |
| Down | CDK15     | 10 | 2.37E-04 | 85694  | 0.294623 |
| Down | HLA-DQA1  | 10 | 0.001488 | 682934 | 0.249878 |
| Down | HSD17B3   | 10 | 1.13E-04 | 75794  | 0.26087  |
| Down | TSHZ3     | 10 | 0.001111 | 304690 | 0.256253 |
| Down | MAP1A     | 9  | 8.61E-04 | 207068 | 0.312393 |
| Down | CSNK1G1   | 9  | 0.001614 | 637430 | 0.248529 |
| Down | GTF2H2C   | 9  | 0.001734 | 341202 | 0.245876 |
| Down | PDLIM3    | 9  | 0.001957 | 559870 | 0.239831 |
| Down | WDR3      | 9  | 6.45E-04 | 234640 | 0.274455 |
| Down | TNFAIP8   | 9  | 9.44E-04 | 850962 | 0.230957 |
| Down | ADAMTS10  | 8  | 9.45E-04 | 260474 | 0.258443 |
| Down | ABCB1     | 8  | 9.74E-04 | 146904 | 0.3      |
| Down | QRICH2    | 8  | 0.001291 | 295070 | 0.261336 |
| Down | INS       | 8  | 4.75E-04 | 194074 | 0.248216 |
| Down | COMP      | 8  | 0.001207 | 326670 | 0.231995 |
| Down | SHCBP1    | 7  | 4.46E-04 | 233846 | 0.256678 |
| Down | DLGAP5    | 7  | 1.46E-04 | 74806  | 0.290108 |
| Down | ARHGAP9   | 7  | 3.62E-04 | 66924  | 0.28522  |
| Down | KCNH1     | 7  | 3.41E-04 | 213892 | 0.253094 |
| Down | KLHL1     | 6  | 1.15E-04 | 30788  | 0.283638 |
| Down | LCN2      | 6  | 4.47E-04 | 83350  | 0.256575 |
| Down | TYMS      | 6  | 4.58E-04 | 134624 | 0.25317  |
| Down | CDKN1C    | 6  | 4.20E-04 | 155814 | 0.26589  |
| Down | DMBT1     | 6  | 0.001176 | 361022 | 0.251748 |
| Down | SULT1C2   | 6  | 4.34E-04 | 98520  | 0.244289 |
| Down | IL10      | 6  | 8.05E-04 | 231670 | 0.245675 |
| Down | SAMD3     | 6  | 6.69E-04 | 135970 | 0.268713 |
| Down | NCKAP5    | 6  | 4.03E-05 | 22814  | 0.2639   |
| Down | CNN1      | 6  | 2.65E-04 | 64314  | 0.23624  |
| Down | PREX1     | 6  | 8.35E-04 | 387030 | 0.254975 |
| Down | CTNNA2    | 5  | 5.71E-04 | 182504 | 0.281204 |
| Down | POU5F1    | 5  | 7.40E-04 | 107680 | 0.274839 |
| Down | POSTN     | 5  | 5.96E-04 | 207158 | 0.228766 |
| Down | CSF2RA    | 5  | 8.10E-04 | 258390 | 0.252907 |
| Down | MATN3     | 5  | 1.69E-04 | 28890  | 0.235848 |
| Down | ASB9      | 5  | 5.76E-04 | 238362 | 0.238055 |
| Down | KRTAP5-1  | 5  | 0.001174 | 179682 | 0.190051 |
| Down | IL5RA     | 5  | 0.001176 | 281872 | 0.257441 |
| Down | KANK4     | 5  | 7.94E-04 | 141232 | 0.240633 |
| Down | ASB16     | 5  | 2.41E-05 | 16592  | 0.266028 |
| Down | KIF4A     | 5  | 4.60E-05 | 13994  | 0.259374 |
| Down | ROBO1     | 5  | 4.93E-04 | 116624 | 0.246421 |
| Down | TNFRSF11A | 4  | 4.04E-04 | 116804 | 0.251934 |
| Down | KRTAP3-1  | 4  | 2.89E-05 | 20452  | 0.252494 |
| Down | UBXN10    | 4  | 5.63E-04 | 69202  | 0.248047 |
| Down | GLG1      | 4  | 4.17E-04 | 62018  | 0.265572 |
| Down | LOXL1     | 4  | 4.78E-04 | 74588  | 0.250404 |
| Down | COMMD7    | 4  | 4.03E-04 | 180366 | 0.233127 |
| Down | SELPLG    | 4  | 8.09E-04 | 244340 | 0.221136 |
| Down | YIPF4     | 4  | 4.79E-05 | 15522  | 0.197986 |
| Down | TMEM108   | 4  | 2.77E-05 | 10972  | 0.243081 |
| Down | KRTAP13-3 | 3  | 3.50E-07 | 422    | 0.210396 |
| Down | LRRC7     | 3  | 7.82E-04 | 166682 | 0.180159 |
| Down | GPX2      | 2  | 0        | 0      | 0.299578 |
| Down | CDH23     | 1  | 0        | 0      | 0.215614 |
| Down | ISX       | 1  | 0        | 0      | 0.240905 |
| Down | NPTX2     | 1  | 0        | 0      | 0.287223 |
| Down | KCNG3     | 1  | 0        | 0      | 0.287223 |
| Down | SMIM5     | 1  | 0        | 0      | 0.239809 |
| Down | TFF3      | 1  | 0        | 0      | 0.239809 |
| Down | FAM111B   | 1  | 0        | 0      | 0.222435 |
| Down | CDKN3     | 1  | 0        | 0      | 0.255626 |
| Down | IFI27L2   | 1  | 0        | 0      | 0.250147 |
| Down | NTN1      | 1  | 0        | 0      | 0.226175 |

|      |         |   |   |   |          |
|------|---------|---|---|---|----------|
| Down | AGAP2   | 1 | 0 | 0 | 0.218611 |
| Down | PIR     | 1 | 0 | 0 | 0.238611 |
| Down | RNASE2  | 1 | 0 | 0 | 0.215016 |
| Down | ADCYAP1 | 1 | 0 | 0 | 0.189649 |
| Down | HADH    | 1 | 0 | 0 | 0.248433 |
| Down | NDRG4   | 1 | 0 | 0 | 0.221222 |

**Table 6** miRNA - target gene and TF - target gene interaction

| Regulation | Target Genes | Degree | MicroRNA         | Regulation | Target Genes | Degree | TF      |
|------------|--------------|--------|------------------|------------|--------------|--------|---------|
| Up         | MYC          | 194    | hsa-mir-4677-3p  | Up         | MAPK3        | 48     | JUND    |
| Up         | HSP90AA1     | 188    | hsa-mir-3125     | Up         | HSP90AA1     | 35     | HSF2    |
| Up         | FKBP5        | 116    | hsa-mir-4779     | Up         | SQSTM1       | 34     | SMAD4   |
| Up         | RNPS1        | 109    | hsa-mir-548az-3p | Up         | STUB1        | 31     | ATF6    |
| Up         | SQSTM1       | 108    | hsa-mir-106a-5p  | Up         | EGFR         | 27     | ELF3    |
| Up         | EGFR         | 83     | hsa-mir-219a-5p  | Up         | YBX1         | 24     | TFAP2A  |
| Up         | MAST3        | 76     | hsa-mir-129-2-3p | Up         | LNX1         | 21     | MAX     |
| Up         | YBX1         | 48     | hsa-mir-1537-3p  | Up         | FKBP5        | 20     | PGR     |
| Up         | PRMT6        | 43     | hsa-mir-4330     | Up         | PRMT6        | 9      | YY1     |
| Up         | MAPK3        | 33     | hsa-mir-3158-3p  | Up         | SGTA         | 7      | MXI1    |
| Up         | SGTA         | 24     | hsa-mir-421      | Up         | POU6F2       | 7      | ALX1    |
| Up         | TNFRSF1A     | 22     | hsa-mir-548an    | Up         | RNPS1        | 7      | STAT3   |
| Up         | STUB1        | 16     | hsa-mir-942-5p   | Up         | TNFRSF1A     | 6      | EP300   |
| Up         | POU6F2       | 15     | hsa-mir-7850-5p  | Up         | MAST3        | 1      | NFYA    |
| Down       | ANLN         | 127    | hsa-mir-664a-3p  | Down       | ESR1         | 126    | FOXF2   |
| Down       | CDK1         | 109    | hsa-mir-5688     | Down       | SMAD9        | 38     | XAB2    |
| Down       | FN1          | 105    | hsa-mir-199b-3p  | Down       | CDK1         | 36     | KHDRBS1 |
| Down       | ESR1         | 98     | hsa-mir-206      | Down       | FN1          | 25     | RELA    |
| Down       | TK1          | 80     | hsa-mir-6512-3p  | Down       | NEK6         | 16     | SRY     |
| Down       | OIP5         | 62     | hsa-mir-767-5p   | Down       | TK1          | 11     | DRAP1   |
| Down       | SMAD9        | 58     | hsa-mir-3689a-3p | Down       | NEDD8        | 10     | PARP1   |
| Down       | MED10        | 41     | hsa-mir-647      | Down       | TTN          | 10     | FOXD3   |
| Down       | NEK6         | 34     | hsa-mir-4485-3p  | Down       | ANLN         | 9      | JUN     |
| Down       | BUB1B        | 32     | hsa-mir-449b-5p  | Down       | BUB1B        | 9      | MYB     |
| Down       | TTN          | 31     | hsa-mir-181c-5p  | Down       | MED10        | 6      | KDM4B   |
| Down       | NEDD8        | 26     | hsa-mir-583      | Down       | PSMA6        | 6      | EBF1    |
| Down       | PSMA6        | 17     | hsa-mir-539-5p   | Down       | OIP5         | 5      | GATA2   |
| Down       | EXOSC8       | 17     | hsa-mir-191-5p   | Down       | KRTAP4-2     | 1      | TBP     |

## Figures

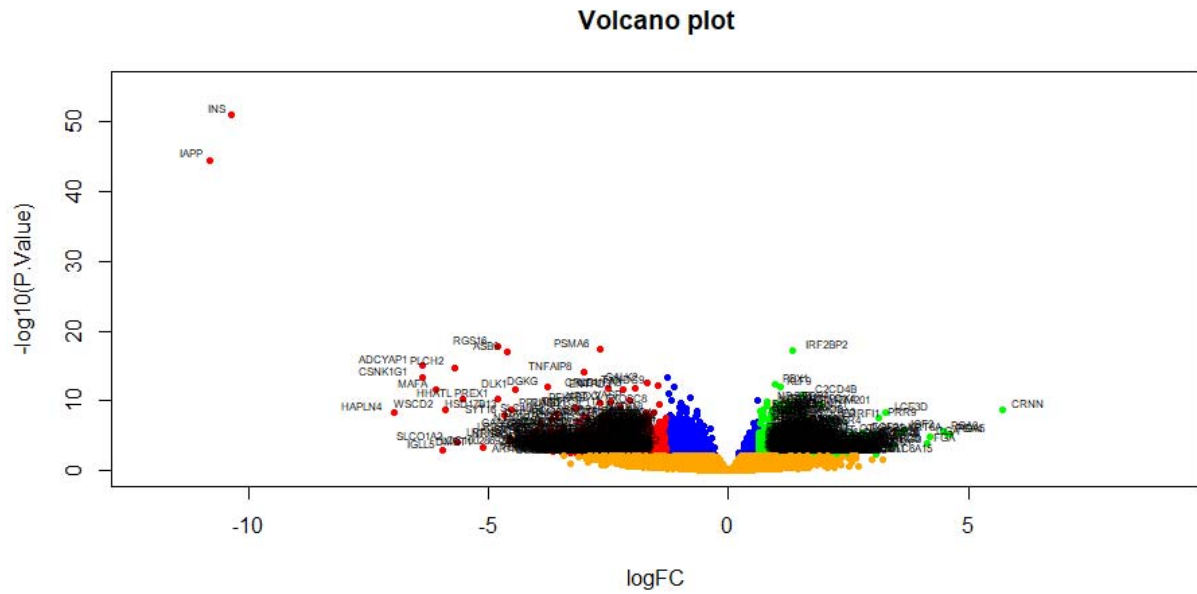

**Fig. 1.** Volcano plot of differentially expressed genes. Genes with a significant change of more than two-fold were selected. Green dot represented up regulated significant genes and red dot represented down regulated significant genes.

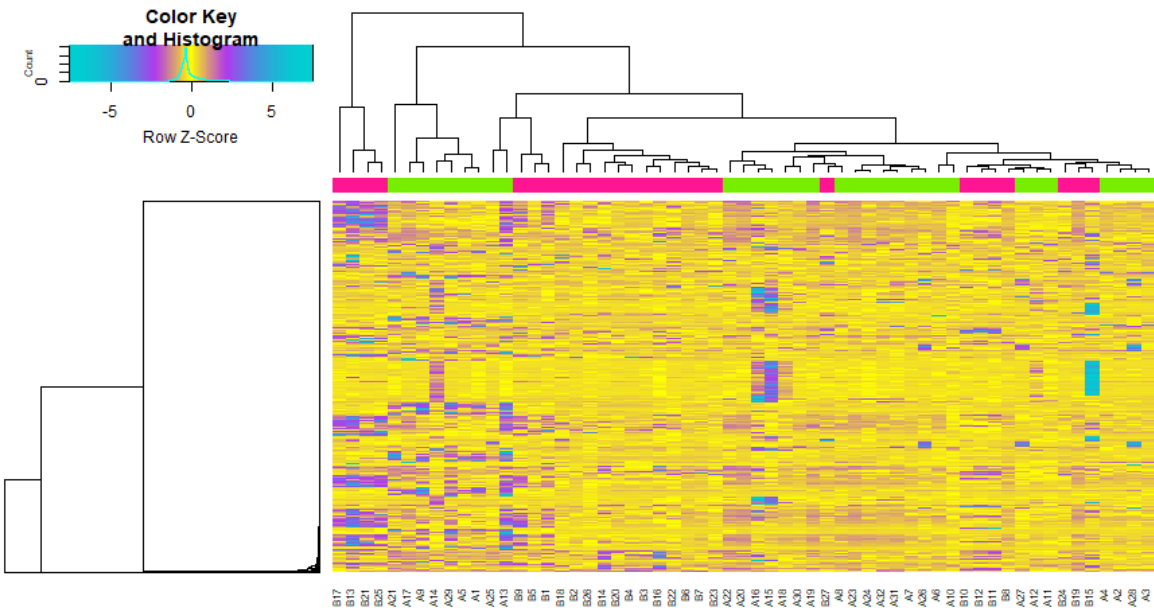

**Fig. 2.** Heat map of differentially expressed genes. Legend on the top left indicate log fold change of genes. (A1 – A32= normal control samples; B1 – B27 = T1DM samples)



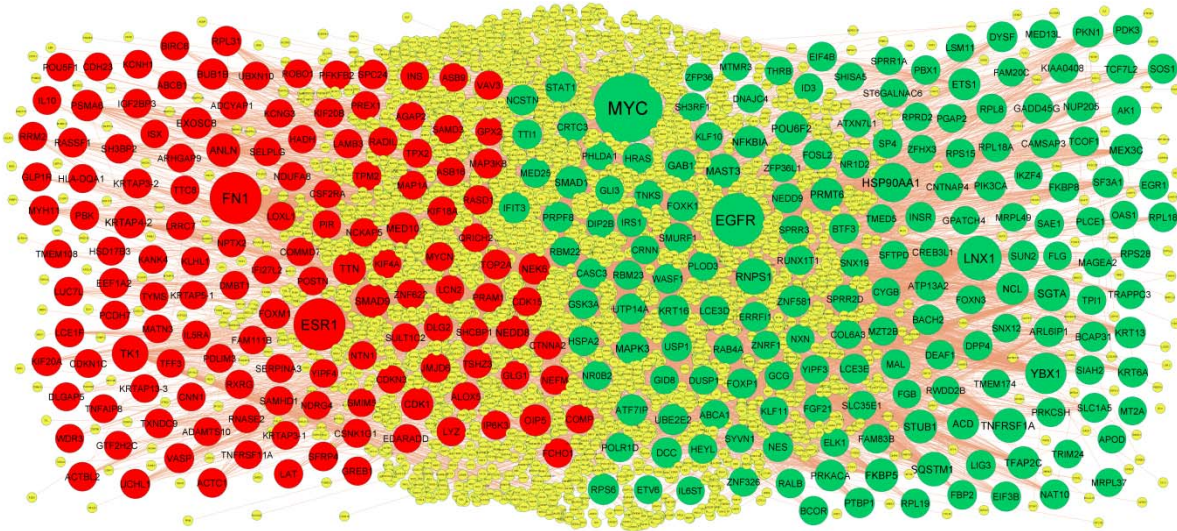

**Fig. 3.** PPI network of DEGs. The PPI network of DEGs was constructed using Cytoscap. Up regulated genes are marked in green; down regulated genes are marked in red

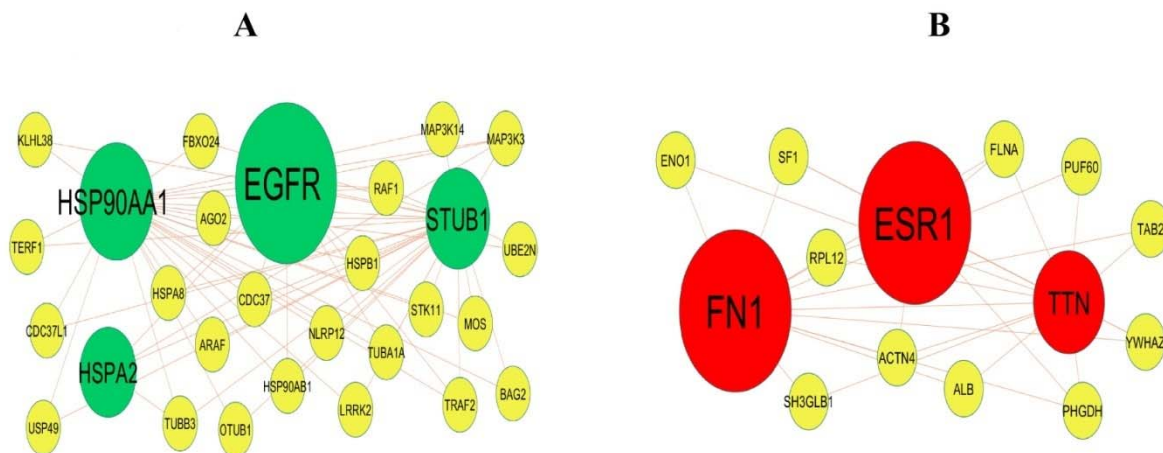

**Fig. 4.** Modules of isolated form PPI of DEGs. (A) The most significant module was obtained from PPI network with 28 nodes and 63 edges for up regulated genes (B) The most significant module was obtained from PPI network with 14 nodes and 30 edges for down regulated genes. Up regulated genes are marked in green; down regulated genes are marked in red.



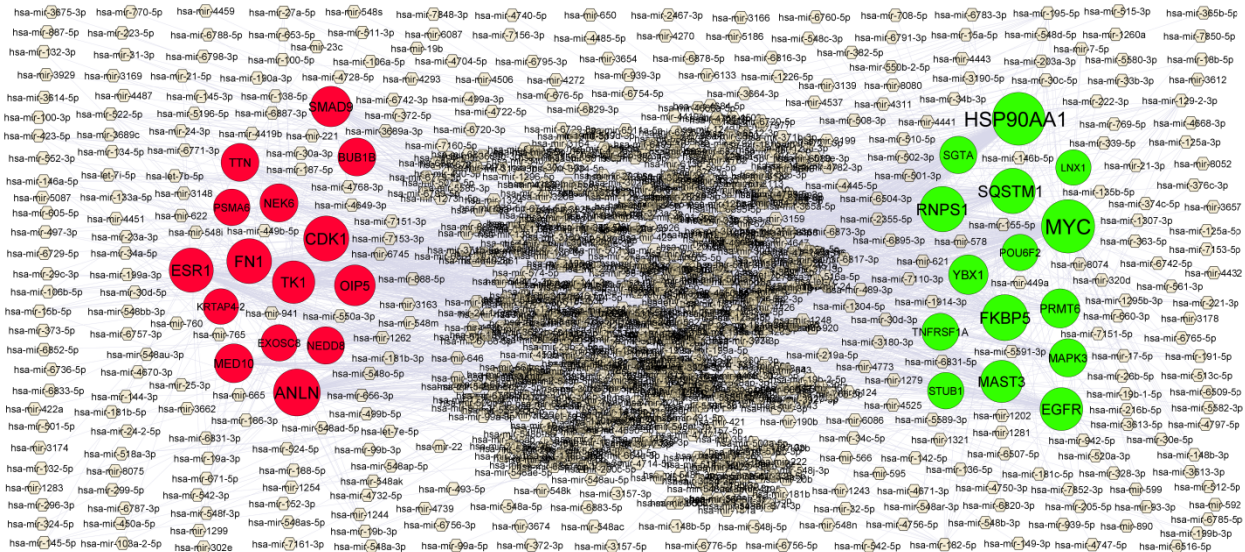

**Fig. 5.** MiRNA - hub gene regulatory network. The chocolate color diamond nodes represent the key miRNAs; up regulated genes are marked in green; down regulated genes are marked in red.

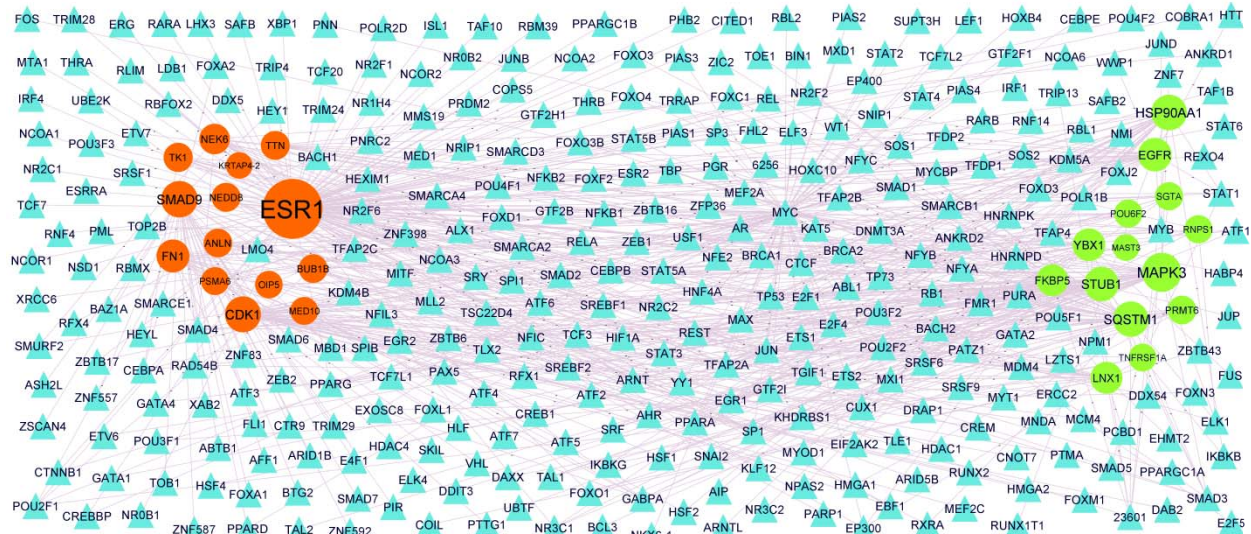

**Fig. 6.** TF - hub gene regulatory network. The blue color triangle nodes represent the key TFs; up regulated genes are marked in green; down regulated genes are marked in red.

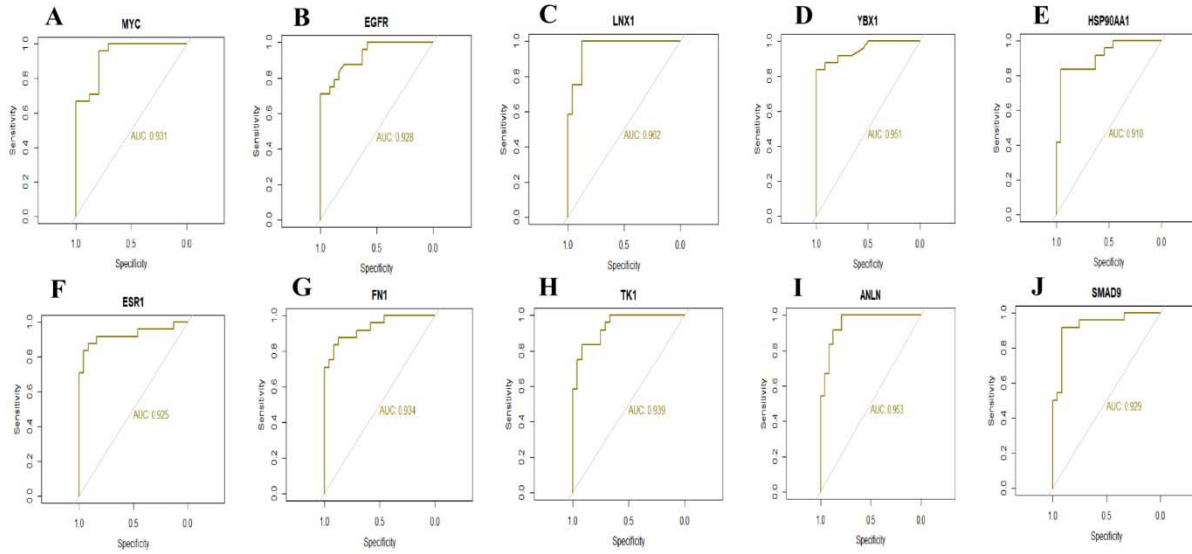

**Fig. 7** ROC curve validated the sensitivity, specificity of hub genes as a predictive biomarker for dementia prognosis. A) MYC B) EGFR C) LNX1 D) YBX1 E) HSP90AA1 F) ESR1 G) FN1 H) TK1 I) ANLN J) SMAD9

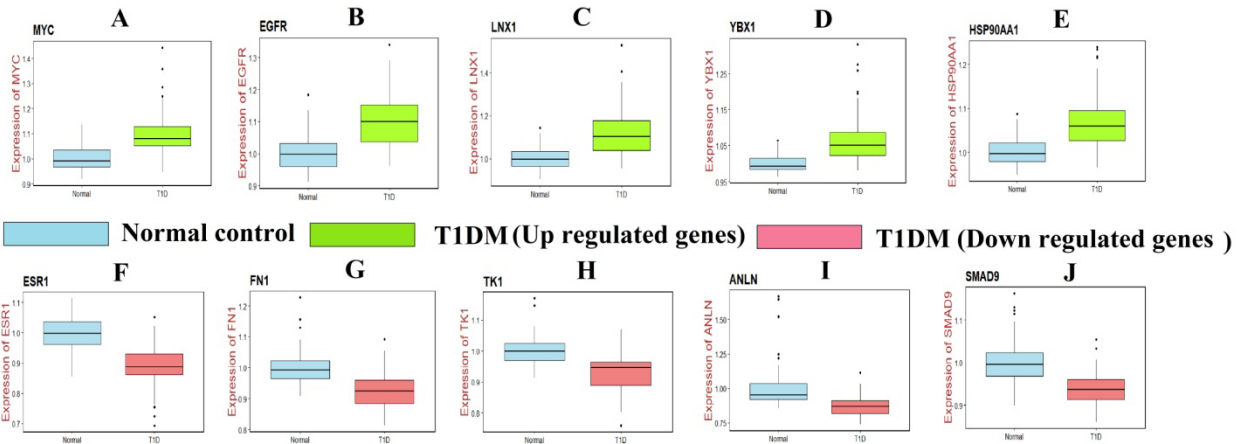

**Fig. 8** Validation of hub genes by RT- PCR. A) MYC B) EGFR C) LNX1 D) YBX1 E) HSP90AA1 F) ESR1 G) FN1 H) TK1 I) ANLN J) SMAD9
